# Supplementary material for: Design, synthesis, molecular docking and molecular dynamic studies of novel benzimidazole–thiazole derivatives as potent and selective COX-2 inhibitors
Source: Royal Society of Chemistry journal article supplement (doi:10.1039/d3nj04438f), 2023-01-01
Supplement: d3nj04438f1.pdf [file d3nj04438f1.pdf]

In order to support quantitative analyses of RMSD, hydrogen bond formation, and 100 ns binding pose assessments, the videos (S1-S5) were prepared and uploaded as electronic supplementary files. It is important for readers to be able to access these videos.
