# Supplementary material for: Design, synthesis, molecular docking and molecular dynamic studies of novel benzimidazole–thiazole derivatives as potent and selective COX-2 inhibitors
Source: Royal Society of Chemistry journal article supplement (doi:10.1039/d3nj04438f), 2023-01-01
Supplement: d3nj04438f2.pdf [file d3nj04438f2.pdf]

# Supporting Information

## Design, synthesis, molecular docking and molecular dynamic studies of novel benzimidazole-thiazole derivatives as potent and selective COX-2 inhibitors

Nurdan Ebru Irmak,<sup>a,b</sup> Begüm Nurpelin Sağlık,<sup>c</sup> Ismail Celik,<sup>d</sup> Hasan Tahsin Sen,<sup>e</sup> Yusuf Ozkay<sup>c</sup> and Gülgün Ayhan-Kılıçgil<sup>\*a</sup>

<sup>a</sup> Department of Pharmaceutical Chemistry, Faculty of Pharmacy, Ankara University, 06560, Ankara, Turkey

<sup>b</sup> Institute of Health Sciences, Department of Pharmaceutical Chemistry, Ankara University, 06110, Ankara, Turkey

<sup>c</sup> Department of Pharmaceutical Chemistry, Faculty of Pharmacy, Anadolu University, 26210, Eskisehir, Turkey

<sup>d</sup> Department of Pharmaceutical Chemistry, Faculty of Pharmacy, Erciyes University, 38039, Kayseri, Turkey

<sup>e</sup> Department of Pharmaceutical Chemistry, Faculty of Pharmacy, Lokman Hekim University, 06510, Ankara, Turkey

---

\*Corresponding Author:

Prof. Dr Gülgün Ayhan-Kılıçgil

Address: Ankara University

Department of Pharmaceutical Chemistry

Faculty of Pharmacy

06560

Ankara, TURKEY

E-mail: kilcigil@pharmacy.ankara.edu.tr

|                                                                          |    |
|--------------------------------------------------------------------------|----|
| <b>Figure S1-1.</b> $^1\text{H}$ -NMR spectrum of compound <b>4</b>      | 5  |
| <b>Figure S1-2.</b> $^{13}\text{C}$ -NMR spectrum of compound <b>4</b>   | 5  |
| <b>Figure S1-3.</b> Mass spectrum of compound <b>4</b>                   | 6  |
| <b>Figure S1-4.</b> $^1\text{H}$ -NMR spectrum of compound <b>5</b>      | 6  |
| <b>Figure S1-5.</b> $^{13}\text{C}$ -NMR spectrum of compound <b>5</b>   | 7  |
| <b>Figure S1-6.</b> Mass spectrum of compound <b>5</b>                   | 7  |
| <b>Figure S1-7.</b> $^1\text{H}$ -NMR spectrum of compound <b>6-1</b>    | 8  |
| <b>Figure S1-8.</b> $^1\text{H}$ -NMR spectrum of compound <b>6-2</b>    | 8  |
| <b>Figure S1-9.</b> $^1\text{H}$ -NMR spectrum of compound <b>6-3</b>    | 9  |
| <b>Figure S1-10.</b> $^1\text{H}$ -NMR spectrum of compound <b>6-4</b>   | 9  |
| <b>Figure S1-11.</b> Mass spectrum of compound <b>6</b>                  | 10 |
| <b>Figure S1-12.</b> $^1\text{H}$ -NMR spectrum of compound <b>6a</b>    | 10 |
| <b>Figure S1-13.</b> $^1\text{H}$ -NMR spectrum of compound <b>6a-1</b>  | 11 |
| <b>Figure S1-14.</b> $^{13}\text{C}$ -NMR spectrum of compound <b>6a</b> | 11 |
| <b>Figure S1-15.</b> Mass spectrum of compound <b>6a</b>                 | 12 |
| <b>Figure S1-16.</b> $^1\text{H}$ -NMR spectrum of compound <b>6b-1</b>  | 12 |
| <b>Figure S1-17.</b> $^1\text{H}$ -NMR spectrum of compound <b>6b-2</b>  | 13 |
| <b>Figure S1-18.</b> $^{13}\text{C}$ -NMR spectrum of compound <b>6b</b> | 13 |
| <b>Figure S1-19.</b> Mass spectrum of compound <b>6b</b>                 | 14 |
| <b>Figure S1-20.</b> $^1\text{H}$ -NMR spectrum of compound <b>6c-1</b>  | 14 |
| <b>Figure S1-21.</b> $^1\text{H}$ -NMR spectrum of compound <b>6c-2</b>  | 15 |
| <b>Figure S1-22.</b> $^{13}\text{C}$ -NMR spectrum of compound <b>6c</b> | 15 |
| <b>Figure S1-23.</b> Mass spectrum of compound <b>6c</b>                 | 16 |
| <b>Figure S1-24.</b> $^1\text{H}$ -NMR spectrum of compound <b>6d-1</b>  | 16 |
| <b>Figure S1-25.</b> $^1\text{H}$ -NMR spectrum of compound <b>6d-2</b>  | 17 |
| <b>Figure S1-26.</b> Mass spectrum of compound <b>6d</b>                 | 17 |
| <b>Figure S1-27.</b> $^1\text{H}$ -NMR spectrum of compound <b>6e</b>    | 18 |
| <b>Figure S1-28.</b> $^{13}\text{C}$ -NMR spectrum of compound <b>6e</b> | 18 |
| <b>Figure S1-29.</b> Mass spectrum of compound <b>6e</b>                 | 19 |
| <b>Figure S1-30.</b> $^1\text{H}$ -NMR spectrum of compound <b>7-1</b>   | 19 |
| <b>Figure S1-31.</b> $^1\text{H}$ -NMR spectrum of compound <b>7-2</b>   | 20 |
| <b>Figure S1-32.</b> $^{13}\text{C}$ -NMR spectrum of compound <b>7</b>  | 20 |

|                                                                          |    |
|--------------------------------------------------------------------------|----|
| <b>Figure S1-33.</b> Mass spectrum of compound <b>7</b>                  | 21 |
| <b>Figure S1-34.</b> <sup>1</sup> H-NMR spectrum of compound <b>7a-1</b> | 21 |
| <b>Figure S1-35.</b> <sup>1</sup> H-NMR spectrum of compound <b>7a-2</b> | 22 |
| <b>Figure S1-36.</b> <sup>13</sup> C-NMR spectrum of compound <b>7a</b>  | 22 |
| <b>Figure S1-37.</b> Mass spectrum of compound <b>7a</b>                 | 23 |
| <b>Figure S1-38.</b> <sup>1</sup> H-NMR spectrum of compound <b>7b-1</b> | 23 |
| <b>Figure S1-39.</b> <sup>1</sup> H-NMR spectrum of compound <b>7b-2</b> | 24 |
| <b>Figure S1-40.</b> <sup>13</sup> C-NMR spectrum of compound <b>7b</b>  | 24 |
| <b>Figure S1-41.</b> Mass spectrum of compound <b>7b</b>                 | 25 |
| <b>Figure S1-42.</b> <sup>1</sup> H-NMR spectrum of compound <b>7c-1</b> | 25 |
| <b>Figure S1-43.</b> <sup>1</sup> H-NMR spectrum of compound <b>7c-2</b> | 26 |
| <b>Figure S1-44.</b> <sup>13</sup> C-NMR spectrum of compound <b>7c</b>  | 26 |
| <b>Figure S1-45.</b> Mass spectrum of compound <b>7c</b>                 | 27 |
| <b>Figure S1-46.</b> <sup>1</sup> H-NMR spectrum of compound <b>7d-1</b> | 27 |
| <b>Figure S1-47.</b> <sup>1</sup> H-NMR spectrum of compound <b>7d-2</b> | 28 |
| <b>Figure S1-48.</b> <sup>13</sup> C-NMR spectrum of compound <b>7d</b>  | 28 |
| <b>Figure S1-49.</b> Mass spectrum of compound <b>7d</b>                 | 29 |
| <b>Figure S1-50.</b> <sup>1</sup> H-NMR spectrum of compound <b>7e-1</b> | 29 |
| <b>Figure S1-51.</b> <sup>1</sup> H-NMR spectrum of compound <b>7e-2</b> | 30 |
| <b>Figure S1-52.</b> <sup>1</sup> H-NMR spectrum of compound <b>7e-3</b> | 30 |
| <b>Figure S1-53.</b> <sup>13</sup> C-NMR spectrum of compound <b>7e</b>  | 31 |
| <b>Figure S1-54.</b> Mass spectrum of compound <b>7e</b>                 | 31 |
| <b>Figure S1-55.</b> <sup>1</sup> H-NMR spectrum of compound <b>8-1</b>  | 32 |
| <b>Figure S1-56.</b> <sup>1</sup> H-NMR spectrum of compound <b>8-2</b>  | 32 |
| <b>Figure S1-57.</b> <sup>13</sup> C-NMR spectrum of compound <b>8</b>   | 33 |
| <b>Figure S1-58.</b> Mass spectrum of compound <b>8</b>                  | 33 |
| <b>Figure S1-59.</b> <sup>1</sup> H-NMR spectrum of compound <b>8a-1</b> | 34 |
| <b>Figure S1-60.</b> <sup>1</sup> H-NMR spectrum of compound <b>8a-2</b> | 34 |
| <b>Figure S1-61.</b> <sup>13</sup> C-NMR spectrum of compound <b>8a</b>  | 35 |
| <b>Figure S1-62.</b> Mass spectrum of compound <b>8a</b>                 | 35 |
| <b>Figure S1-63.</b> <sup>1</sup> H-NMR spectrum of compound <b>8b-1</b> | 36 |
| <b>Figure S1-64.</b> <sup>1</sup> H-NMR spectrum of compound <b>8b-2</b> | 36 |

|                                                                          |    |
|--------------------------------------------------------------------------|----|
| <b>Figure S1-65.</b> $^{13}\text{C}$ -NMR spectrum of compound <b>8b</b> | 37 |
| <b>Figure S1-66.</b> Mass spectrum of compound <b>8b</b>                 | 37 |
| <b>Figure S1-67.</b> $^1\text{H}$ -NMR spectrum of compound <b>8c-1</b>  | 38 |
| <b>Figure S1-68.</b> $^1\text{H}$ -NMR spectrum of compound <b>8c-2</b>  | 38 |
| <b>Figure S1-69.</b> $^1\text{H}$ -NMR spectrum of compound <b>8c-3</b>  | 39 |
| <b>Figure S1-70.</b> $^{13}\text{C}$ -NMR spectrum of compound <b>8c</b> | 39 |
| <b>Figure S1-71.</b> Mass spectrum of compound <b>8c</b>                 | 40 |
| <b>Figure S1-72.</b> $^1\text{H}$ -NMR spectrum of compound <b>8d-1</b>  | 40 |
| <b>Figure S1-73.</b> $^1\text{H}$ -NMR spectrum of compound <b>8d-2</b>  | 41 |
| <b>Figure S1-74.</b> $^{13}\text{C}$ -NMR spectrum of compound <b>8d</b> | 41 |
| <b>Figure S1-75.</b> Mass spectrum of compound <b>8d</b>                 | 42 |
| <b>Figure S1-76.</b> $^1\text{H}$ -NMR spectrum of compound <b>8e-1</b>  | 42 |
| <b>Figure S1-77.</b> $^1\text{H}$ -NMR spectrum of compound <b>8e-2</b>  | 43 |
| <b>Figure S1-78.</b> $^{13}\text{C}$ -NMR spectrum of compound <b>8e</b> | 43 |
| <b>Figure S1-79.</b> Mass spectrum of compound <b>8e</b>                 | 44 |

# Copies of <sup>1</sup>H, <sup>13</sup>C NMR and MS spectra of compounds (S1)

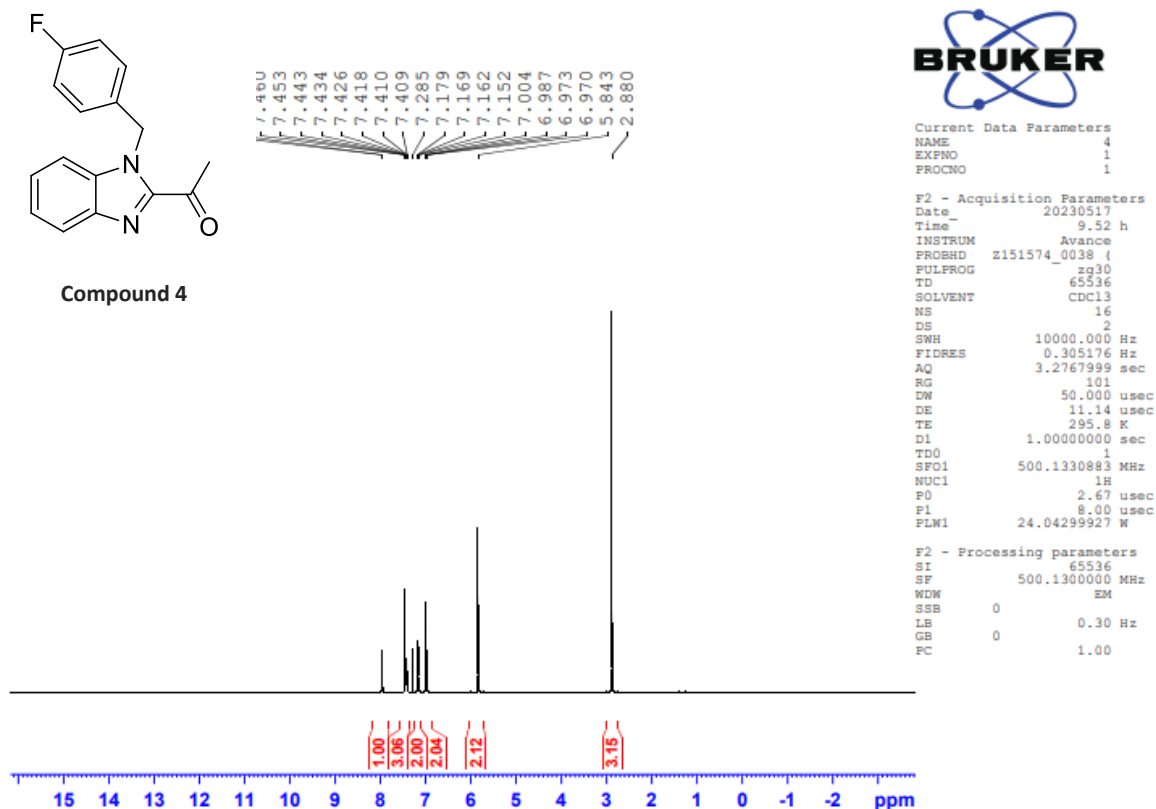

Figure S1-1. <sup>1</sup>H-NMR spectrum of compound 4

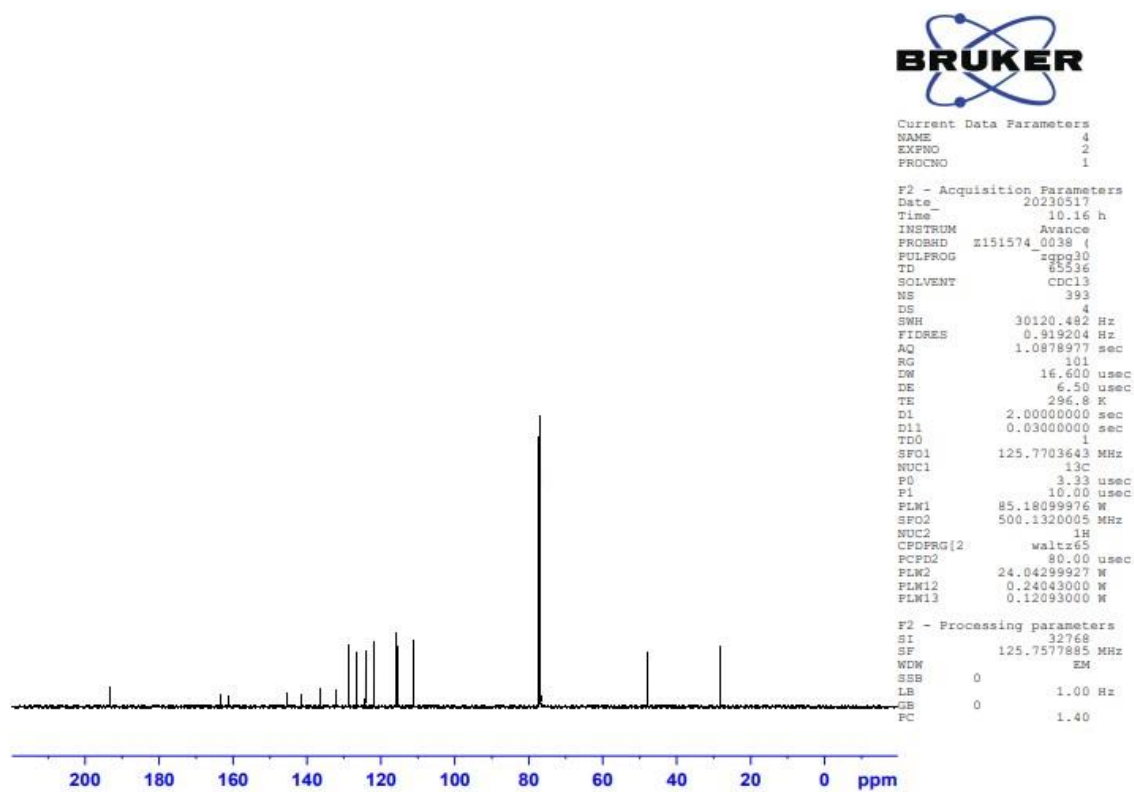

Figure S1-2. <sup>13</sup>C-NMR spectrum of compound 4

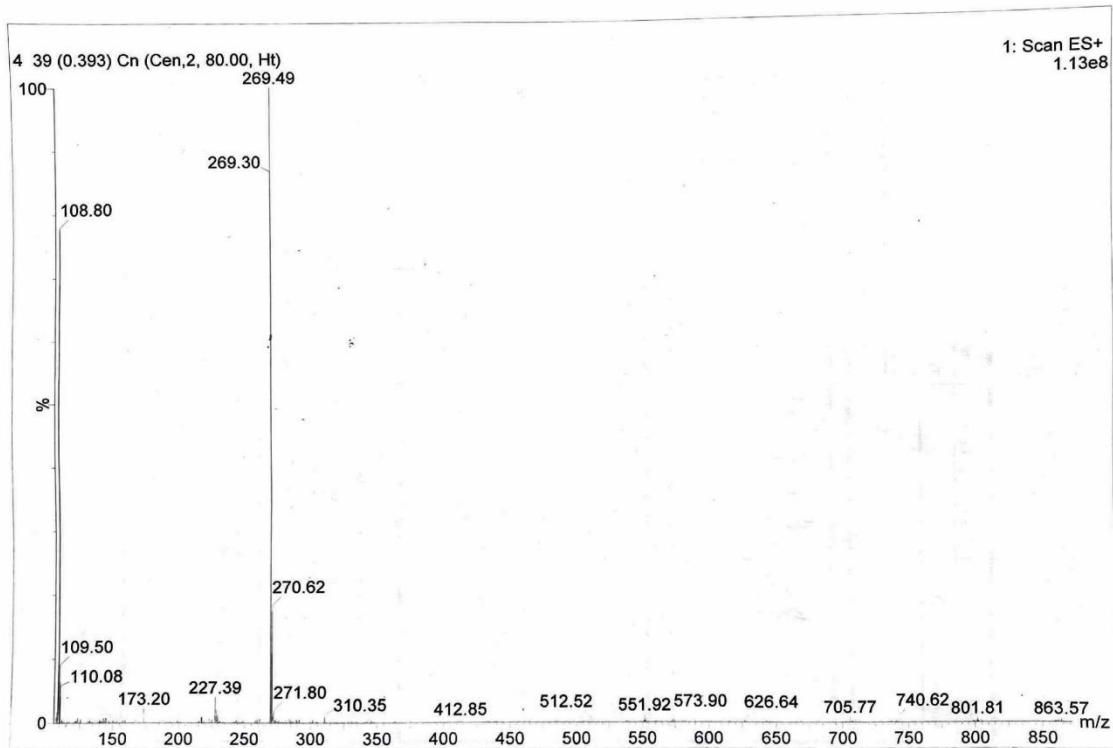

Figure S1-3. Mass spectrum of compound 4

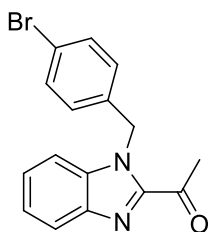

Compound 5

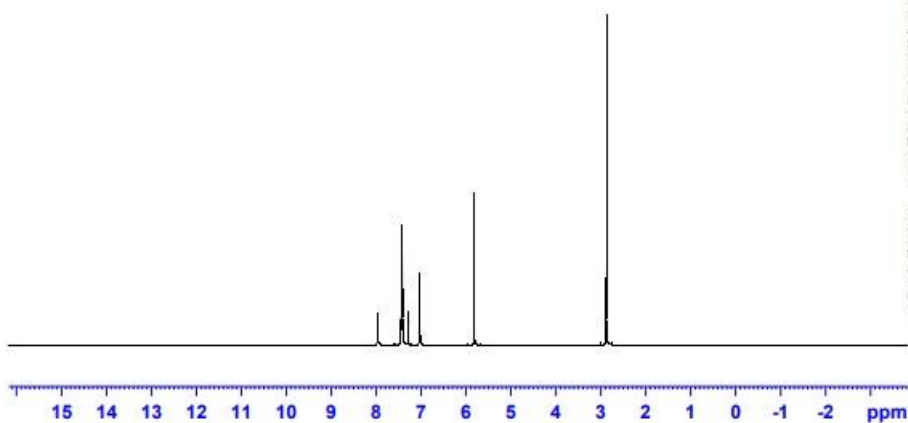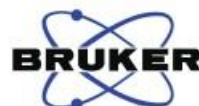

Current Data Parameters  
NAME 5  
EXPNO 1  
PROCNO 1

F2 - Acquisition Parameters  
Date\_ 20230517  
Time 10.37 h  
INSTRUM Avance  
PROBHD z151574\_0038 (4  
PULPROG zg30  
TD 65536  
SOLVENT CDCl3  
NS 16  
DS 2  
SWH 10000.000 Hz  
FIDRES 0.305176 Hz  
AQ 3.2767999 sec  
RG 101  
DE 50.000 usec  
TE 11.14 usec  
TD0 295.8 K  
D1 1.00000000 sec  
SFO1 500.1330883 MHz  
NUC1 1H  
P0 2.67 usec  
F1 8.00 usec  
PLW1 24.04299927 W

F2 - Processing parameters  
SI 65536  
SF 500.1300000 MHz  
WDW EM  
SSB 0  
LB 0.30 Hz  
GB 0  
PC 1.00

Figure S1-4. <sup>1</sup>H-NMR spectrum of compound 5

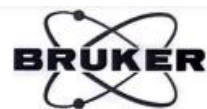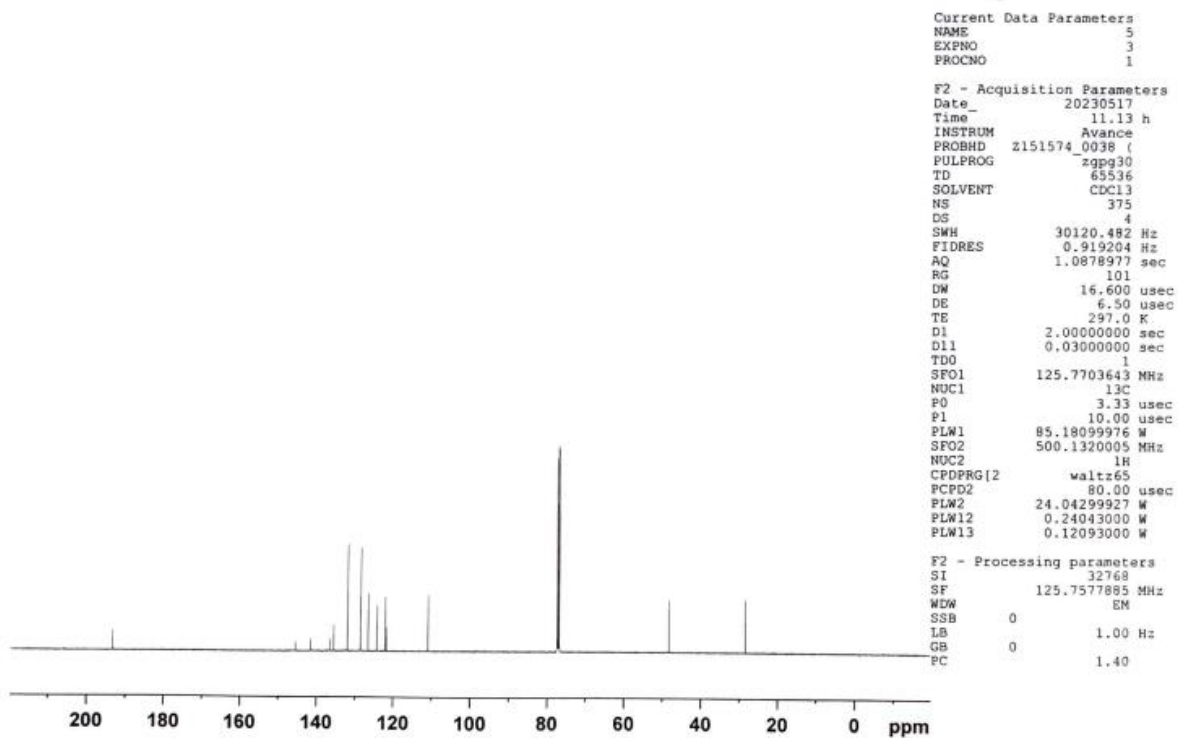

Figure S1-5. <sup>13</sup>C-NMR spectrum of compound 5

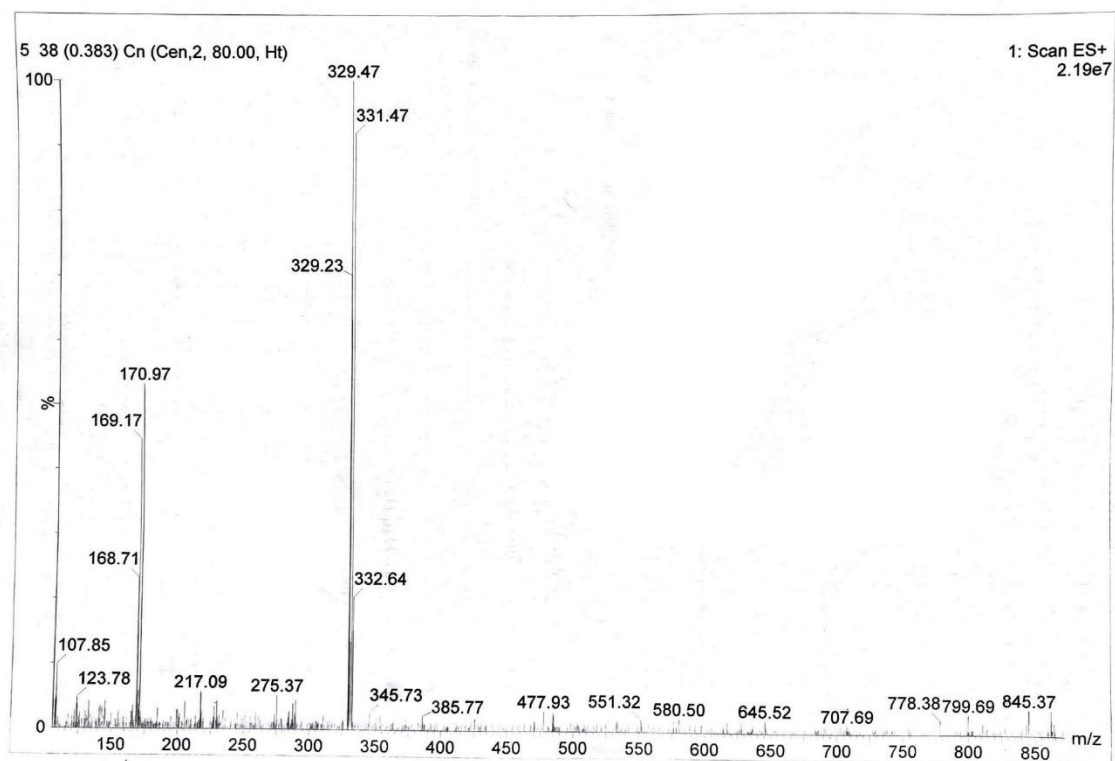

Figure S1-6. Mass spectrum of compound 5

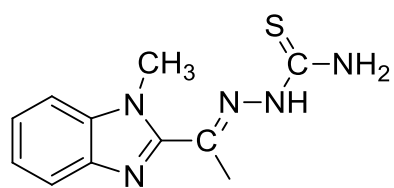

Compound 6

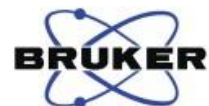

```

Current Data Parameters
NAME          6
EXPNO        4
PROCNO       1

F2 - Acquisition Parameters
Date_         20230509
Time_         10.18 h
INSTRUM      Avance
PROBHD       Z151574_0038 (
PULPROG      zg30
TD           65536
SOLVENT      DMSO
NS           16
DS           2
SWH          10000.000 Hz
FIDRES       0.305176 Hz
AQ           3.2767999 sec
RG           101
DW           50.000 usec
DE           11.14 usec
TE           302.7 K
D1           1.0000000 sec
TD0          1
SFO1         500.1330883 MHz
NUC1         1H
P0           2.67 usec
PL           8.00 usec
PLW1        24.04299927 W

F2 - Processing parameters
SI           65536
SF           500.1300000 MHz
WDW          EM
SSB          0
LB           0.30 Hz
GB           0
PC           1.00
  
```

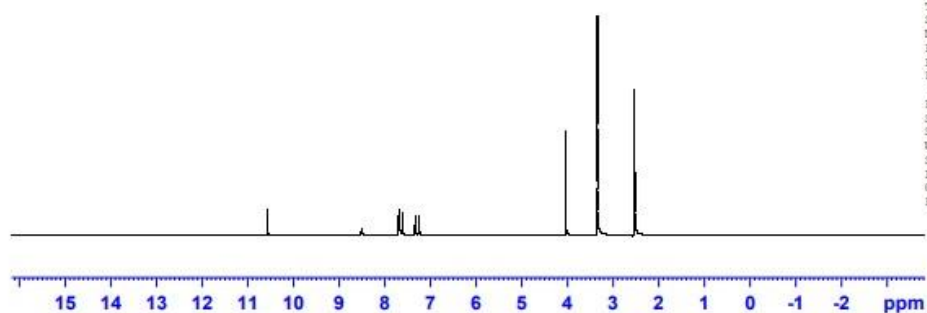

Figure S1-7. <sup>1</sup>H-NMR spectrum of compound 6-1

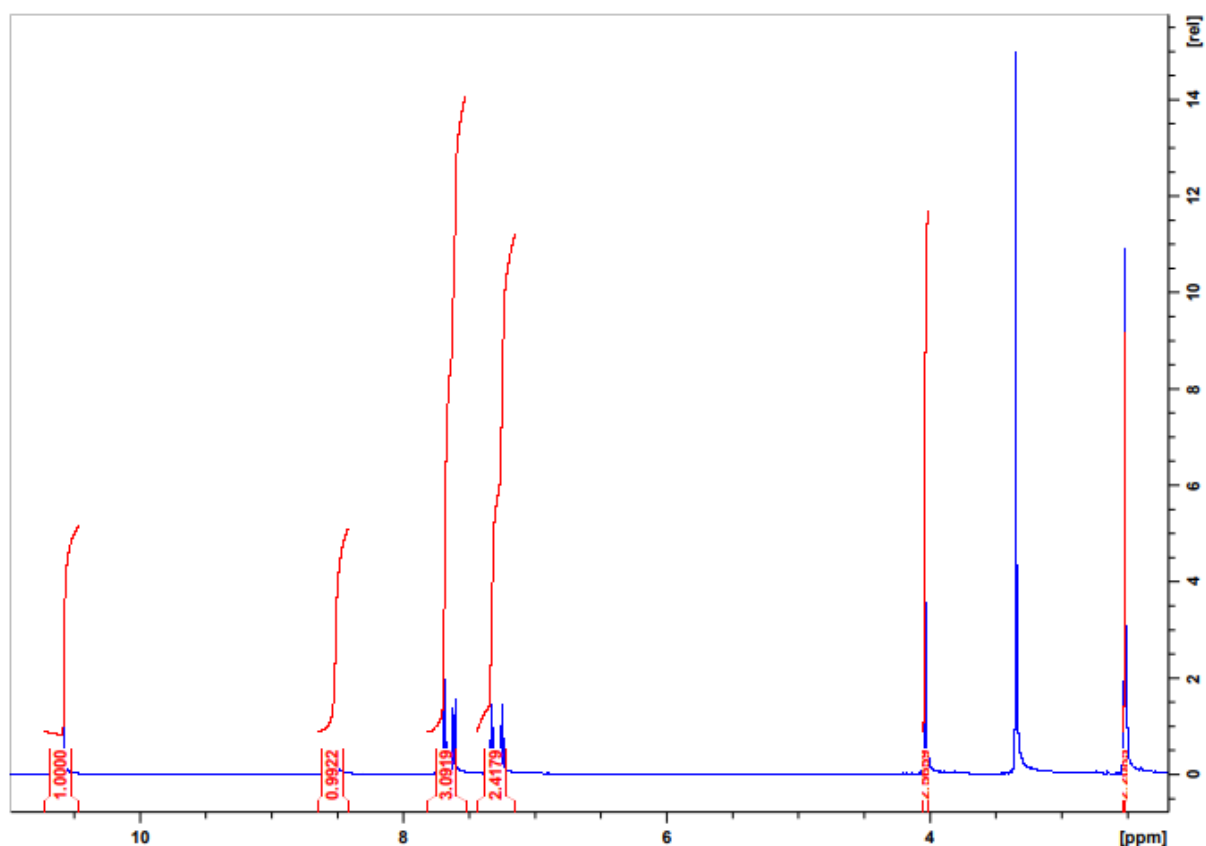

Figure S1-8. <sup>1</sup>H-NMR spectrum of compound 6-2



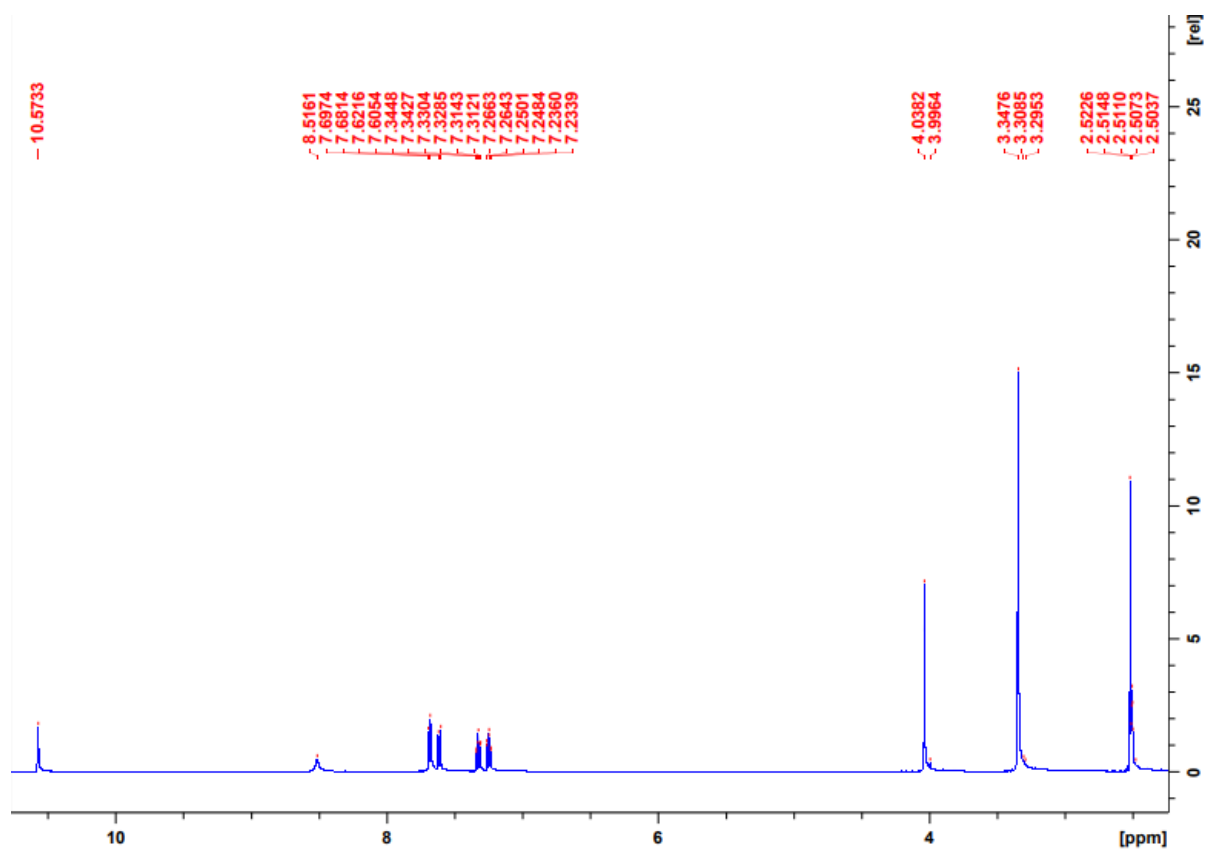

Figure S1-9.  $^1\text{H}$ -NMR spectrum of compound 6-3

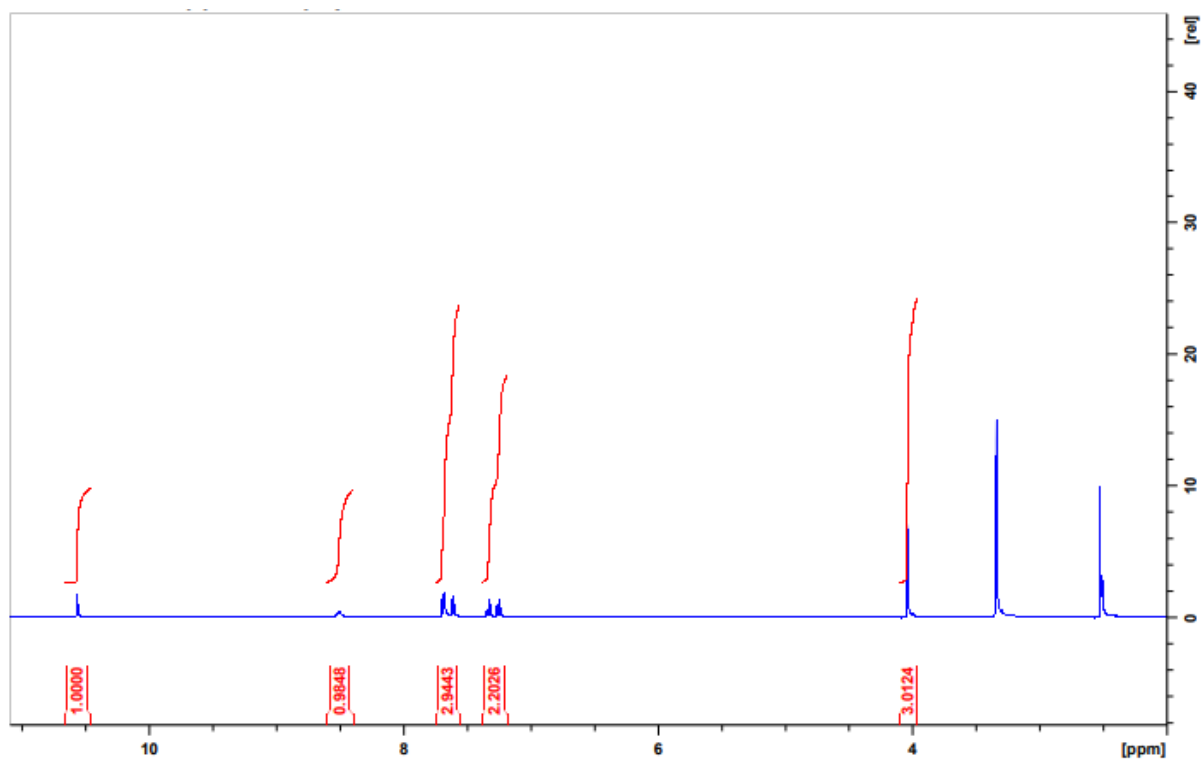

Figure S1-10.  $^1\text{H}$ -NMR spectrum of compound 6-4

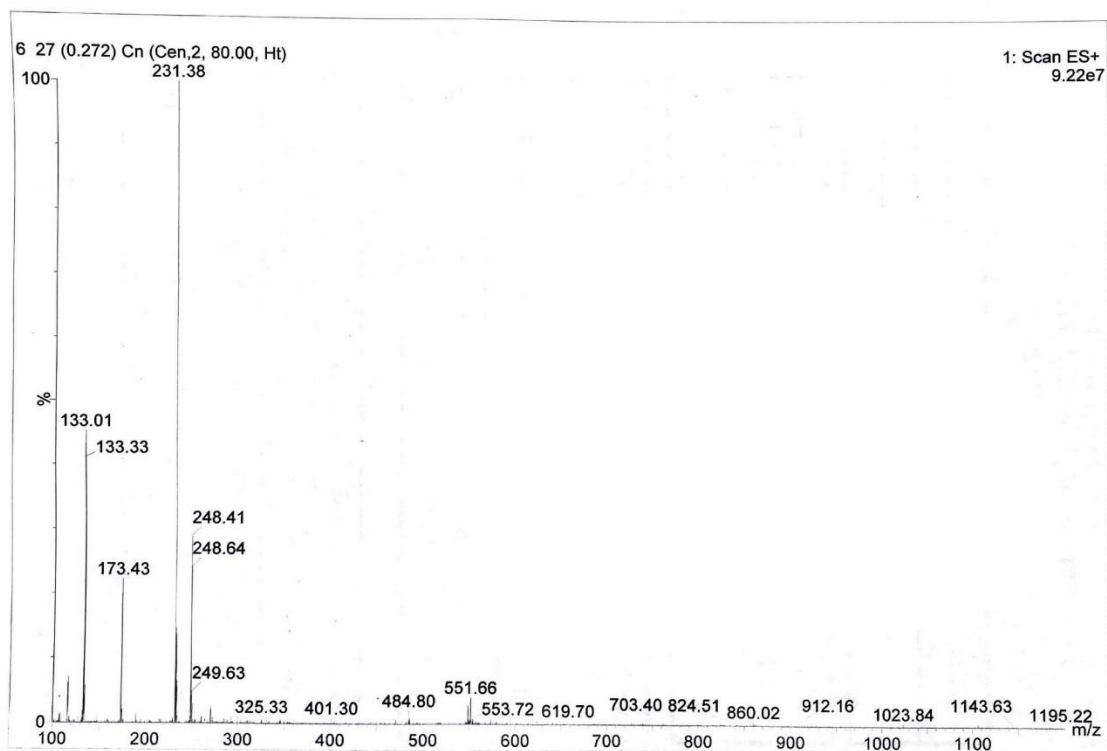

Figure S1-11. Mass spectrum of compound 6

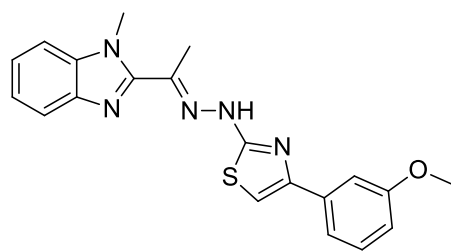

Compound 6a

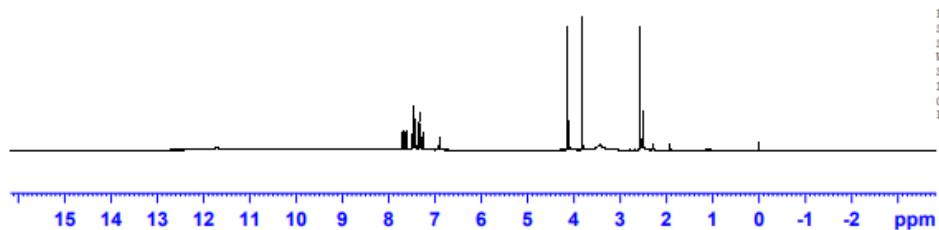

Figure S1-12. <sup>1</sup>H-NMR spectrum of compound 6a

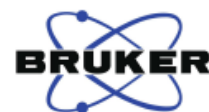

Current Data Parameters  
NAME 6a  
EXPNO 9  
PROCNO 1

F2 - Acquisition Parameters  
Date\_ 20230522  
Time\_ 10.58 h  
INSTRUM Avance  
PROBHD z151574\_0038 f  
PULPROG zg30  
TD 65536  
SOLVENT DMSO  
NS 16  
DS 2  
SNH 10000.000 Hz  
FIDRES 0.305176 Hz  
AQ 3.2767999 sec  
RG 101  
DW 50.000 usec  
DE 11.14 usec  
TE 310.2 K  
D1 1.00000000 sec  
TDO 1  
SFO1 500.1330883 MHz  
NUC1 1H  
P0 2.67 usec  
P1 8.00 usec  
PLW1 24.04299927 W

F2 - Processing parameters  
SI 65536  
SF 500.1300000 MHz  
WDW EM  
SSB 0  
LB 0.30 Hz  
GB 0  
PC 1.00

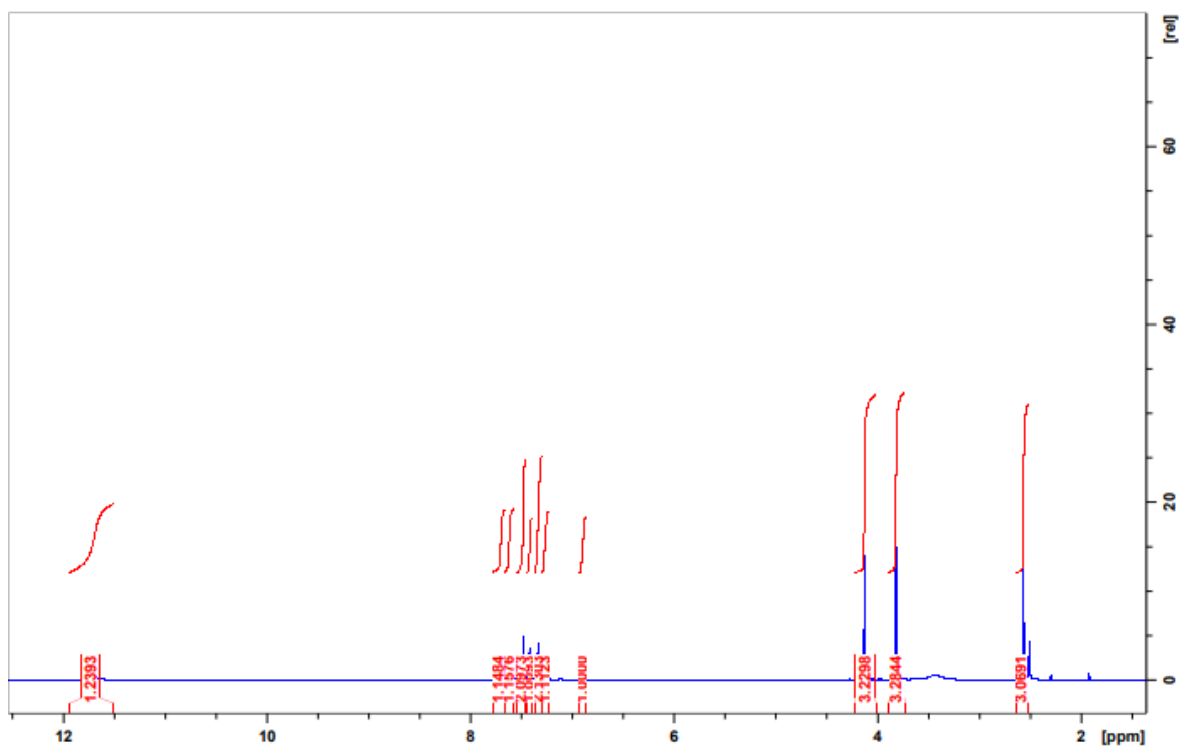

Figure S1-13.  $^1\text{H}$ -NMR spectrum of compound **6a-1**

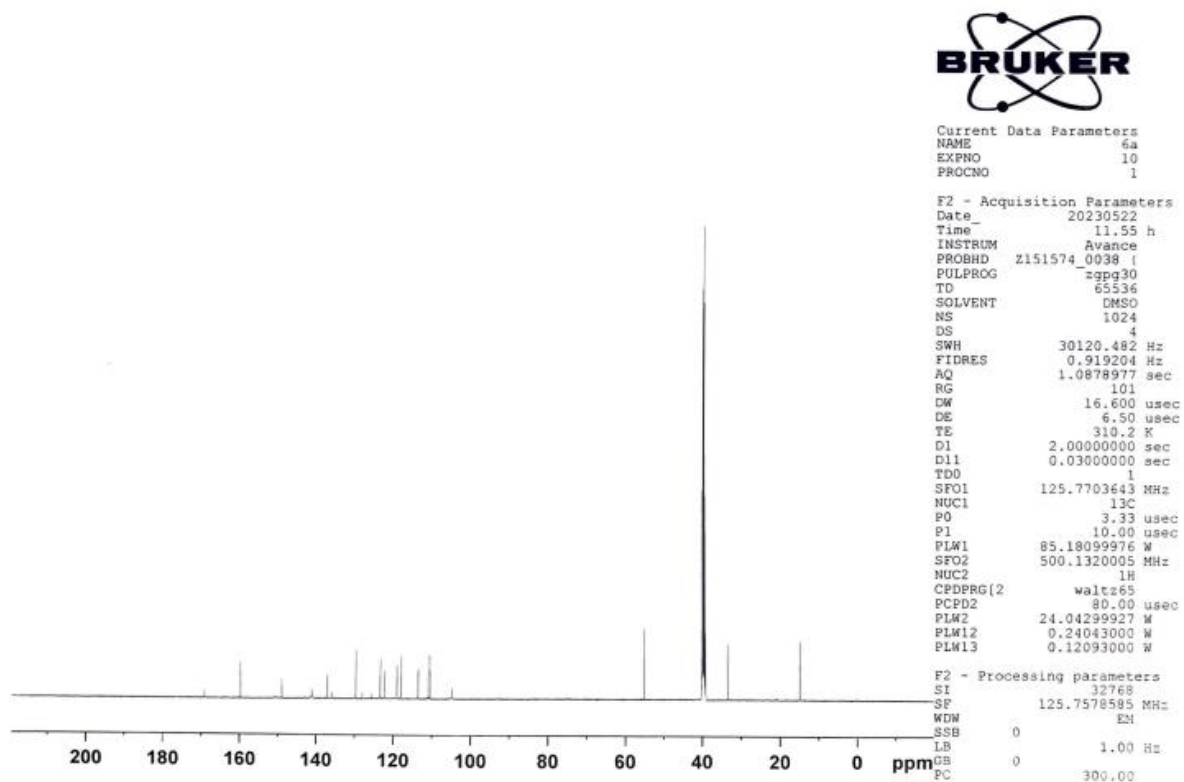

Figure S1-14.  $^{13}\text{C}$ -NMR spectrum of compound **6a**

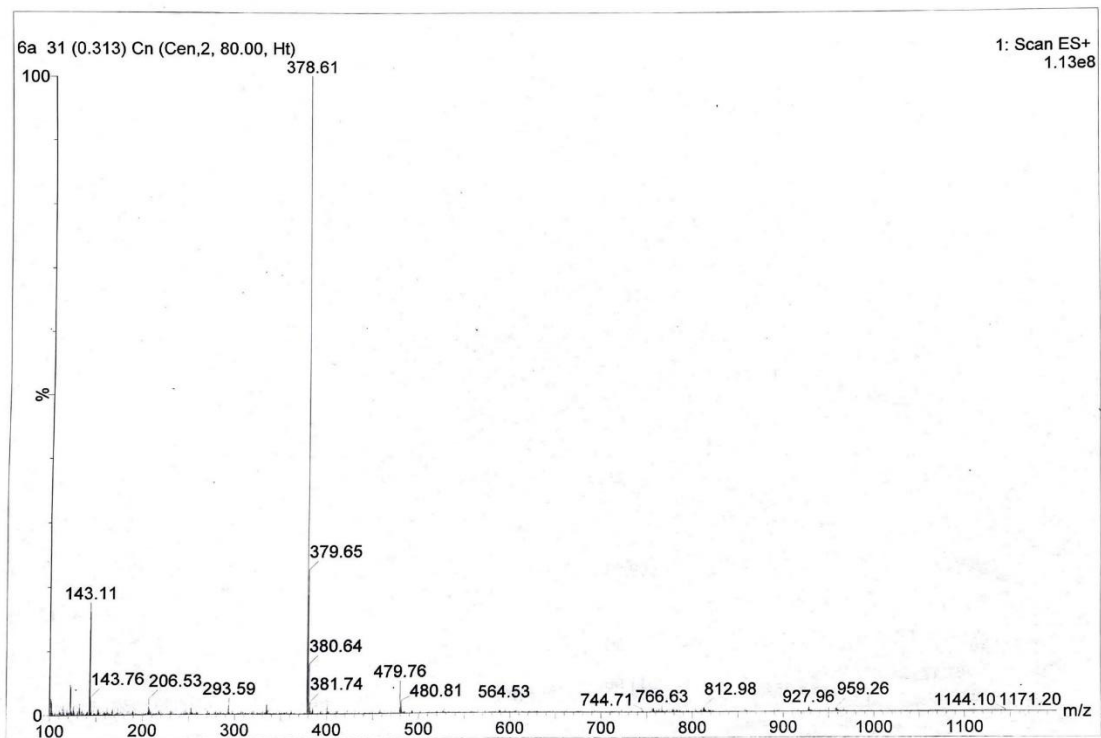

Figure S1-15. Mass spectrum of compound 6a

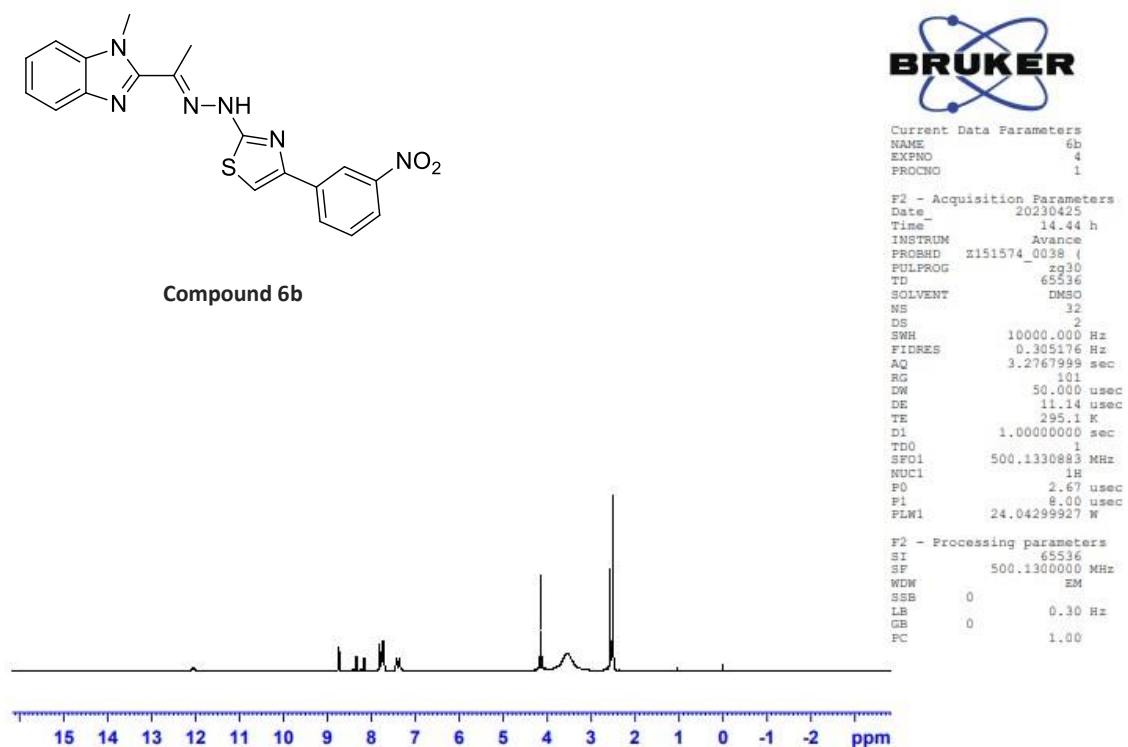

Figure S1-16.  $^1\text{H-NMR}$  spectrum of compound 6b-1

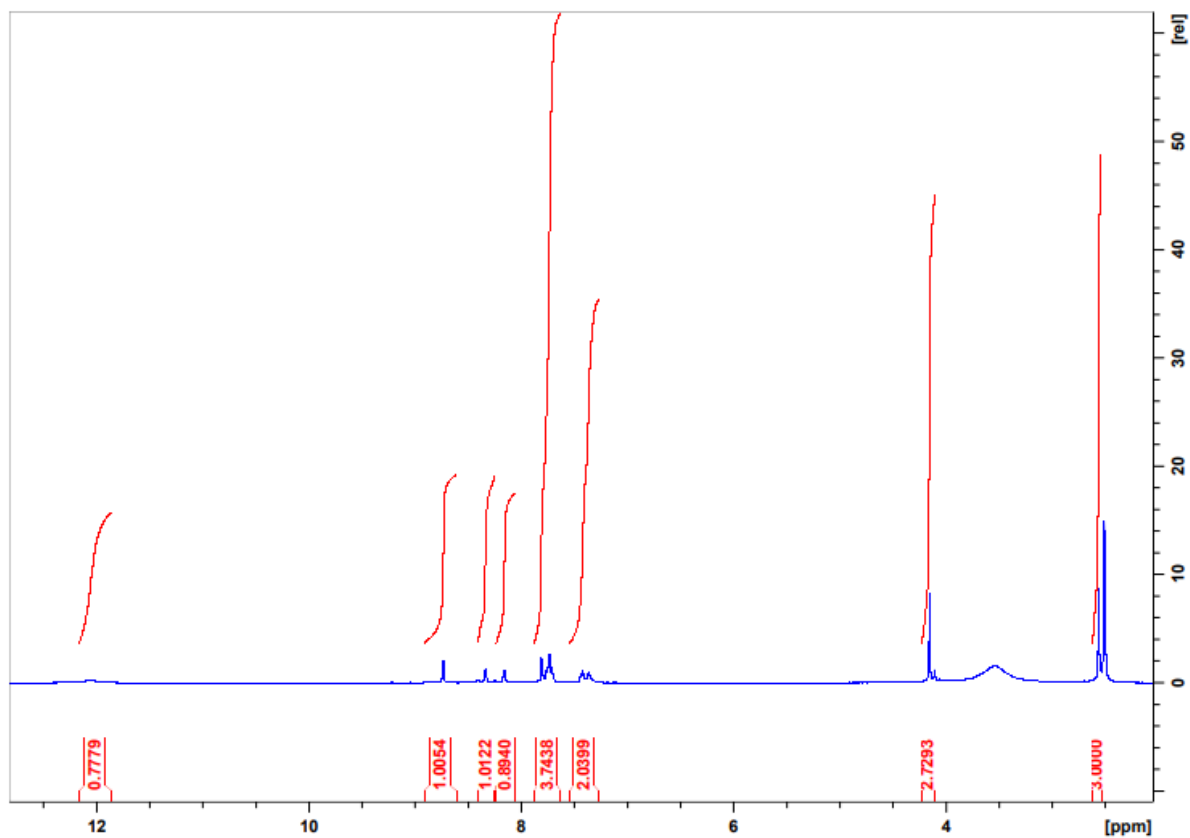

Figure S1-17.  $^1\text{H}$ -NMR spectrum of compound 6b-2

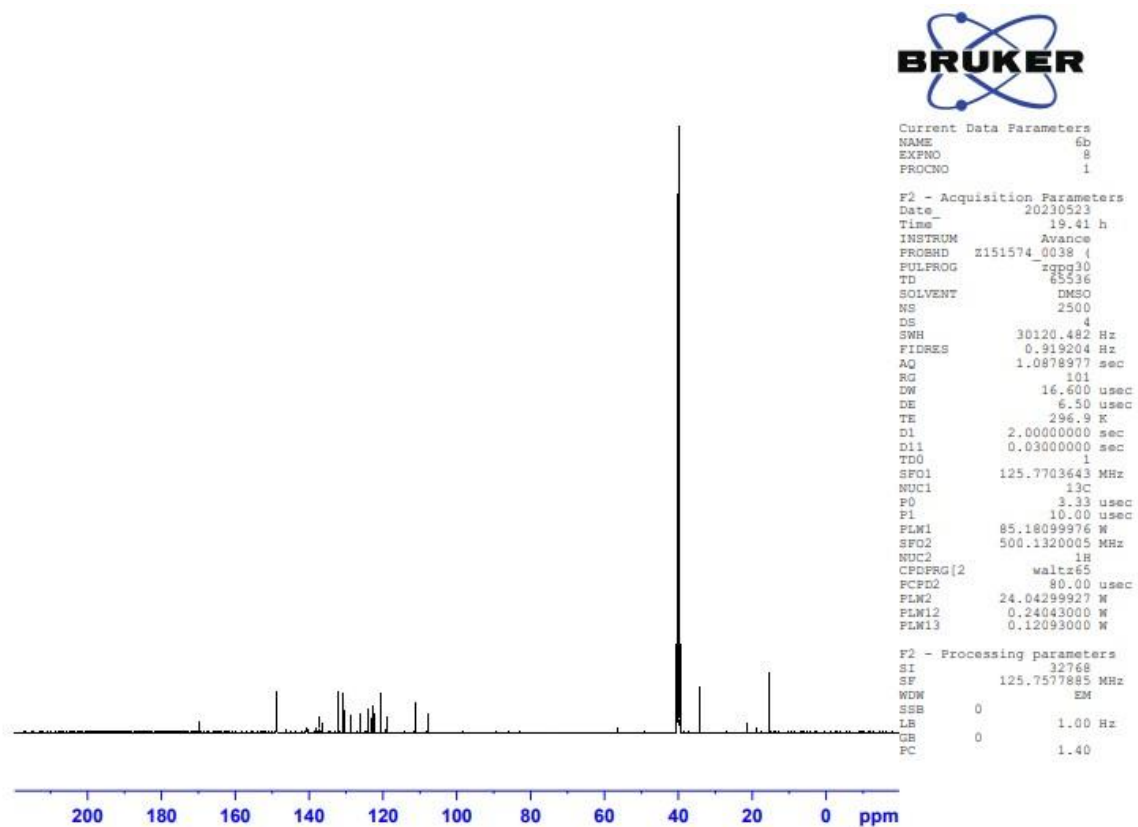

Figure S1-18.  $^{13}\text{C}$ -NMR spectrum of compound 6b

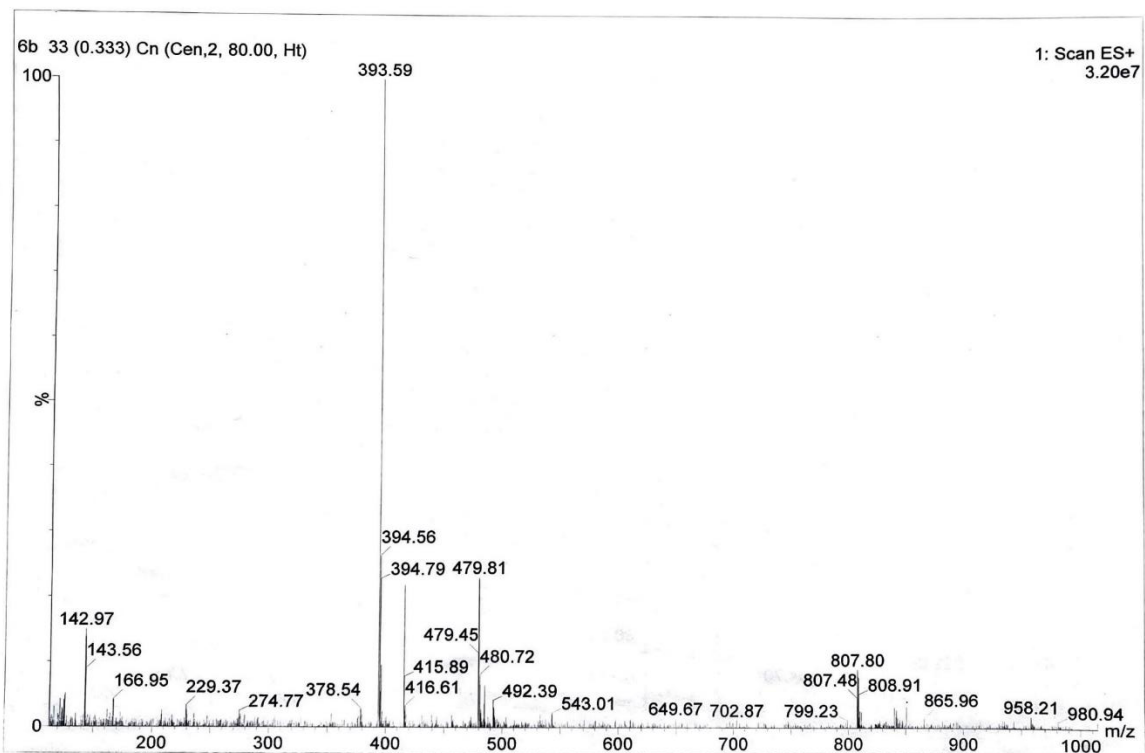

Figure S1-19. Mass spectrum of compound 6b

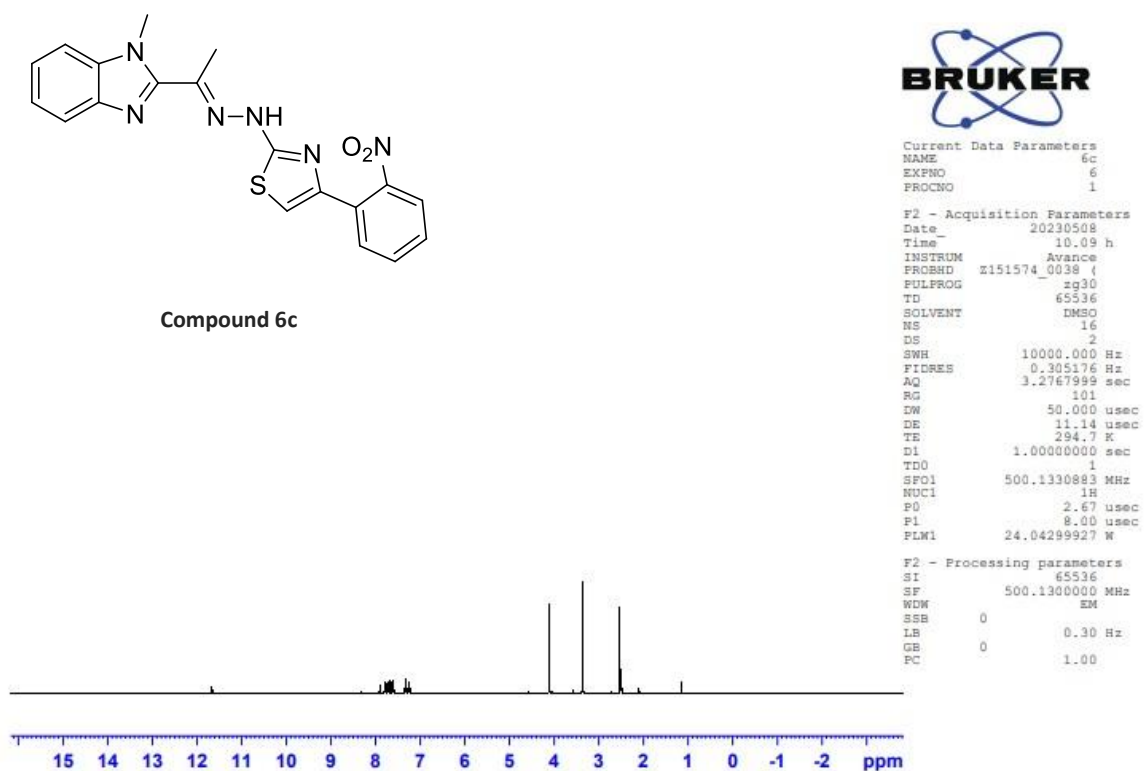

Figure S1-20. <sup>1</sup>H-NMR spectrum of compound 6c-1

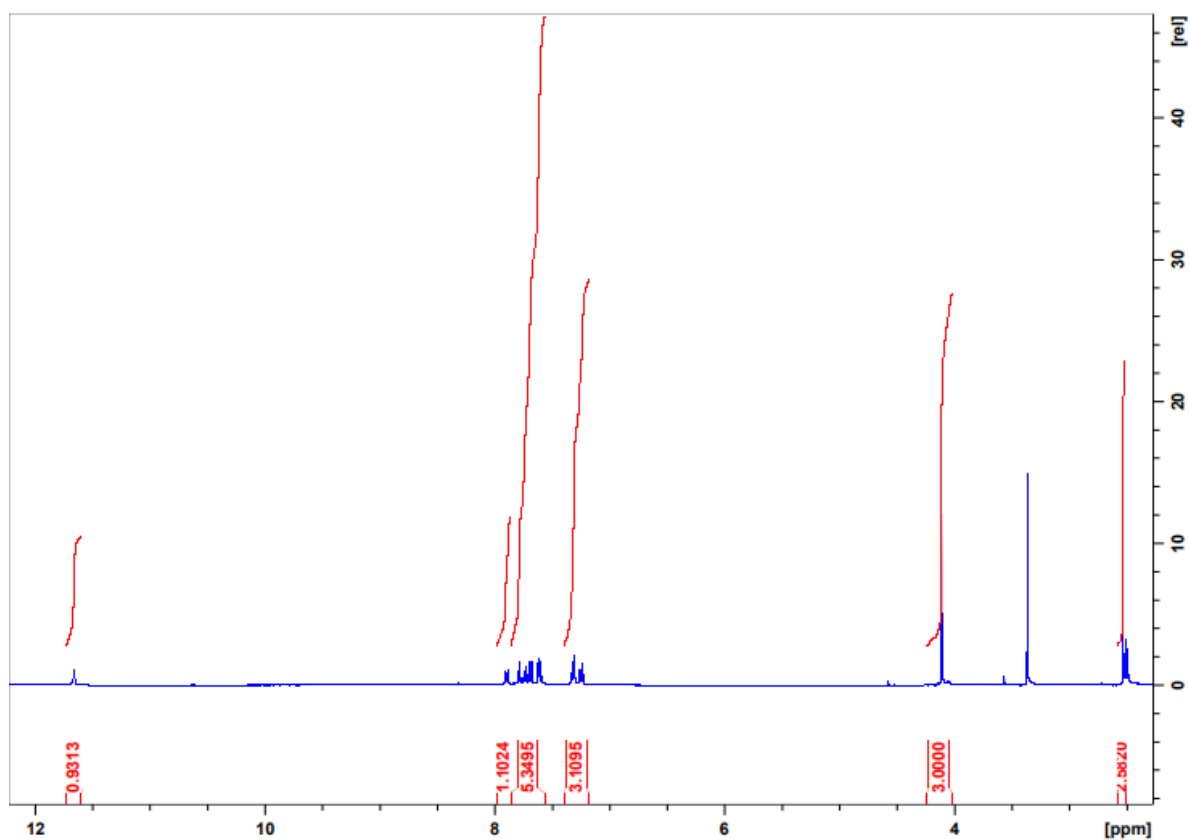

Figure S1-21. <sup>1</sup>H-NMR spectrum of compound 6c-2

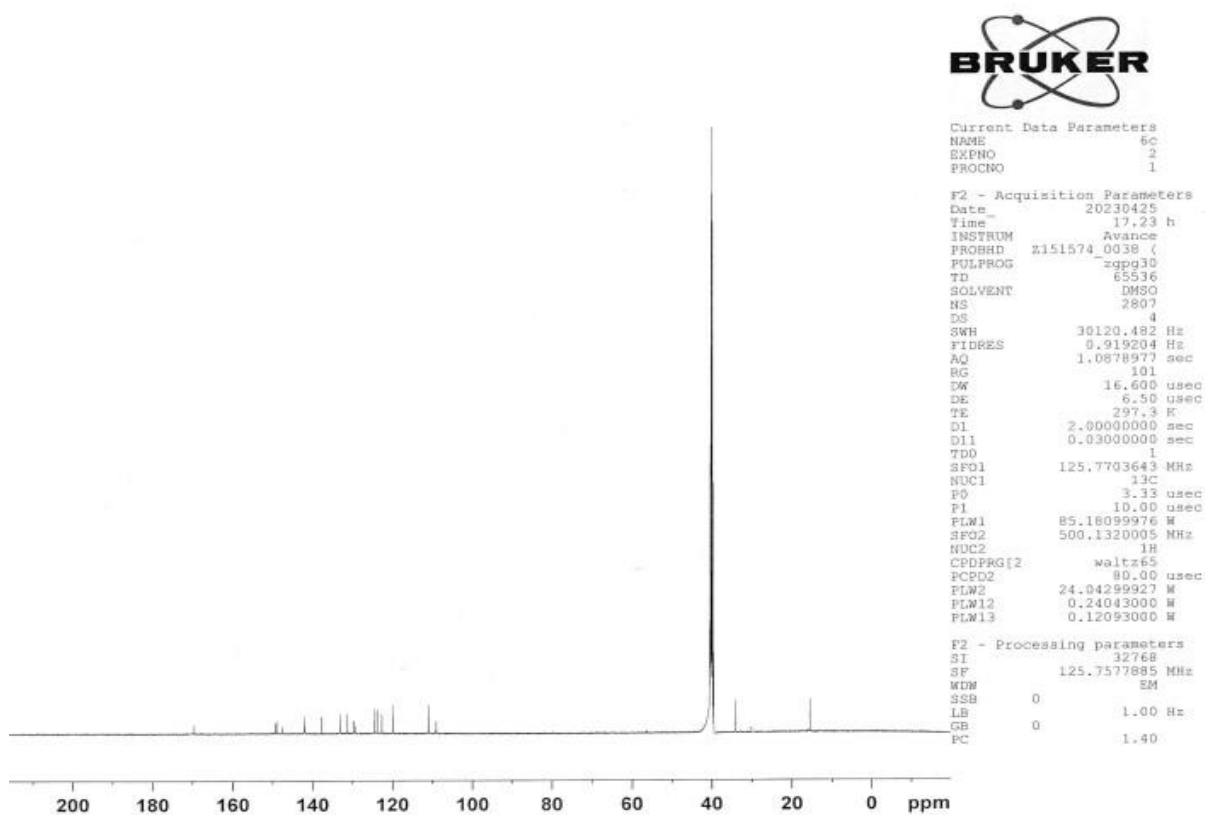

Figure S1-22. <sup>13</sup>C-NMR spectrum of compound 6c

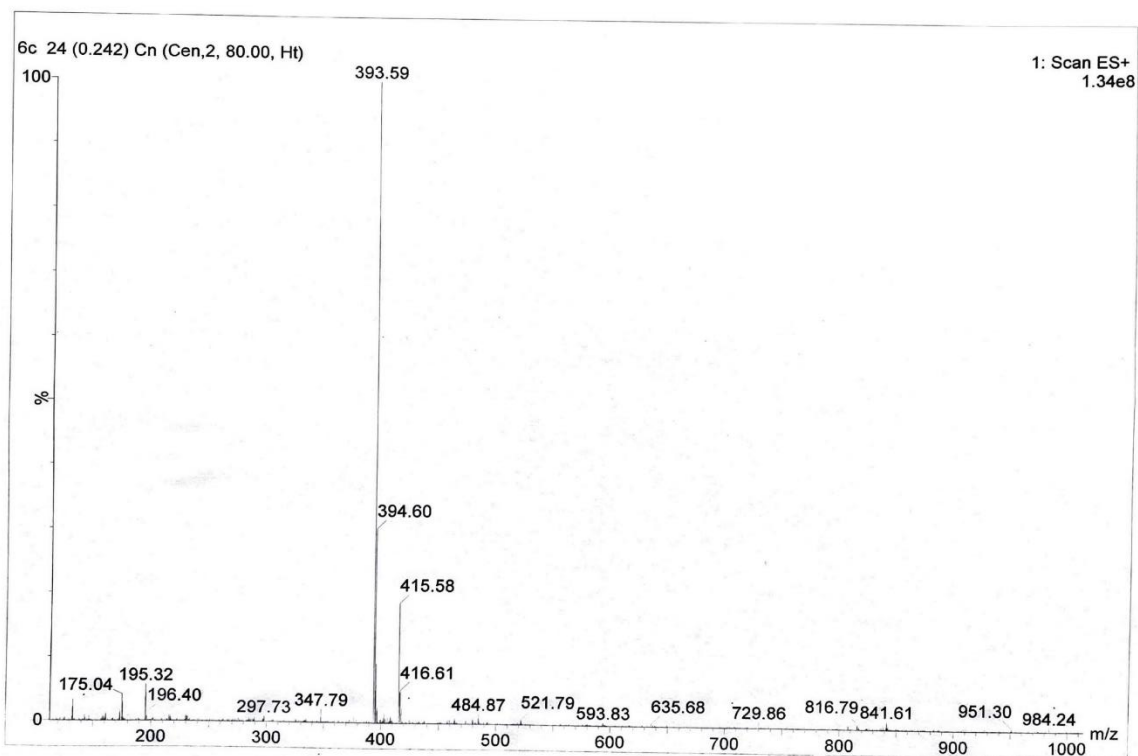

Figure S1-23. Mass spectrum of compound 6c

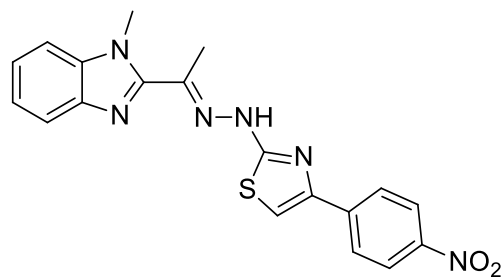

Compound 6d

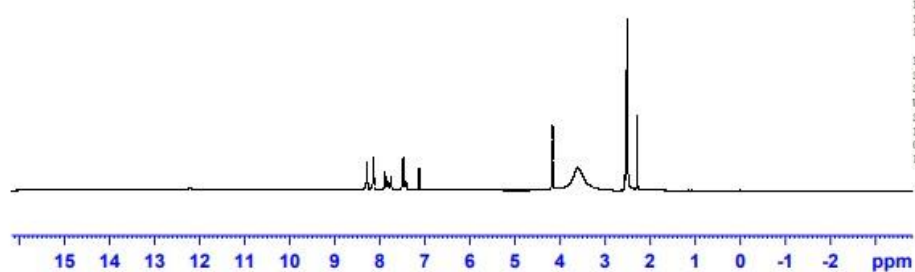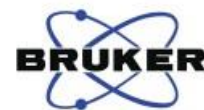

Current Data Parameters  
NAME 6d  
EXPNO 1  
PROCNO 1

F2 - Acquisition Parameters  
Date 20230508  
Time 15.11 h  
INSTRUM Avance  
PROBHD Z151574\_0038 (4  
PULPROG zg30  
TD 65536  
SOLVENT DMSO  
NS 16  
DS 2  
SWH 10000.000 Hz  
FIDRES 0.305176 Hz  
AQ 3.2767999 sec  
RG 101  
DW 50.000 usec  
DE 11.14 usec  
TE 294.9 K  
D1 1.0000000 sec  
TD0 1  
SFO1 500.1330883 MHz  
NUC1 1H  
P0 2.67 usec  
P1 8.00 usec  
PLW1 24.04299927 W

F2 - Processing parameters  
SI 65536  
SF 500.1330000 MHz  
WDW EM  
SSB 0  
LB 0.30 Hz  
GB 0  
PC 1.00

Figure S1-24. <sup>1</sup>H-NMR spectrum of compound 6d-1



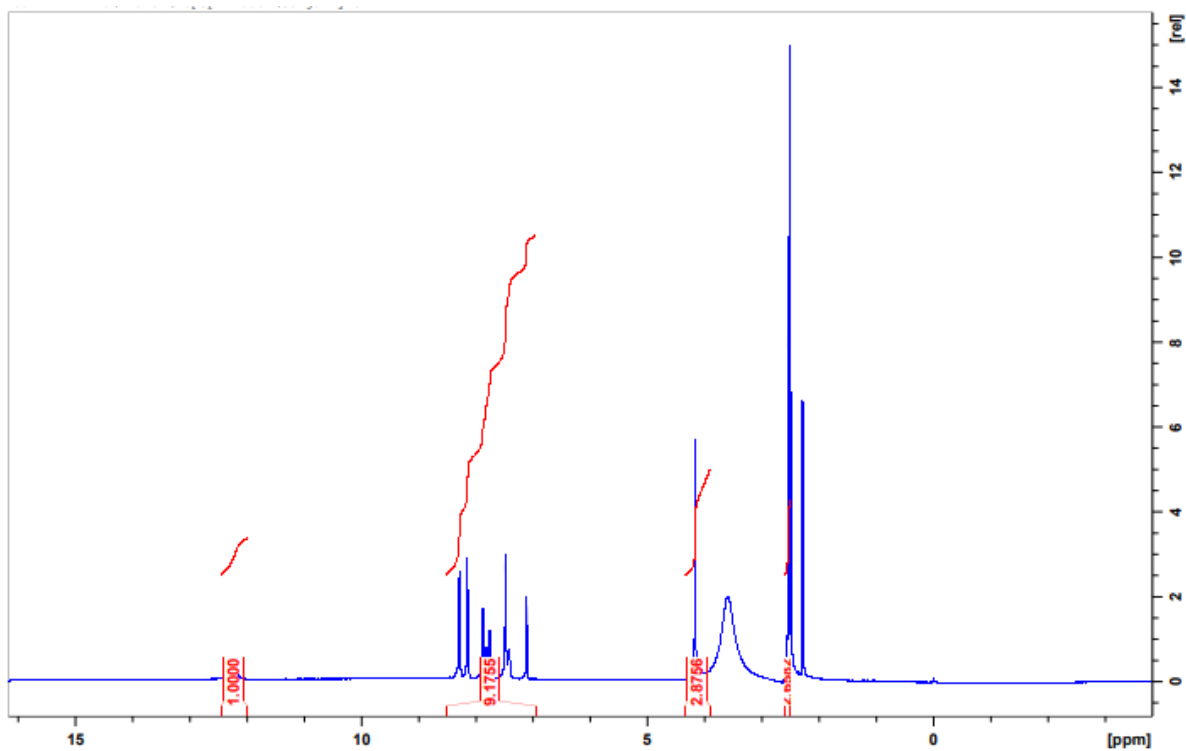

Figure S1-25.  $^1\text{H-NMR}$  spectrum of compound **6d-2**

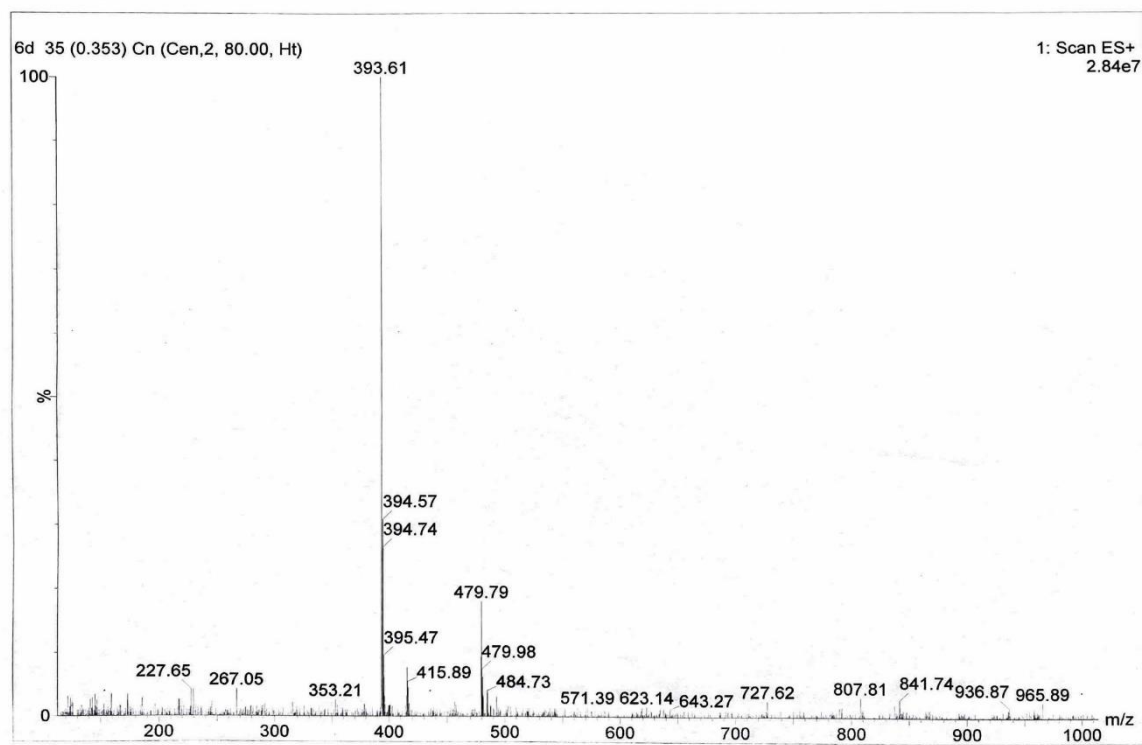

Figure S1-26. Mass spectrum of compound **6d**

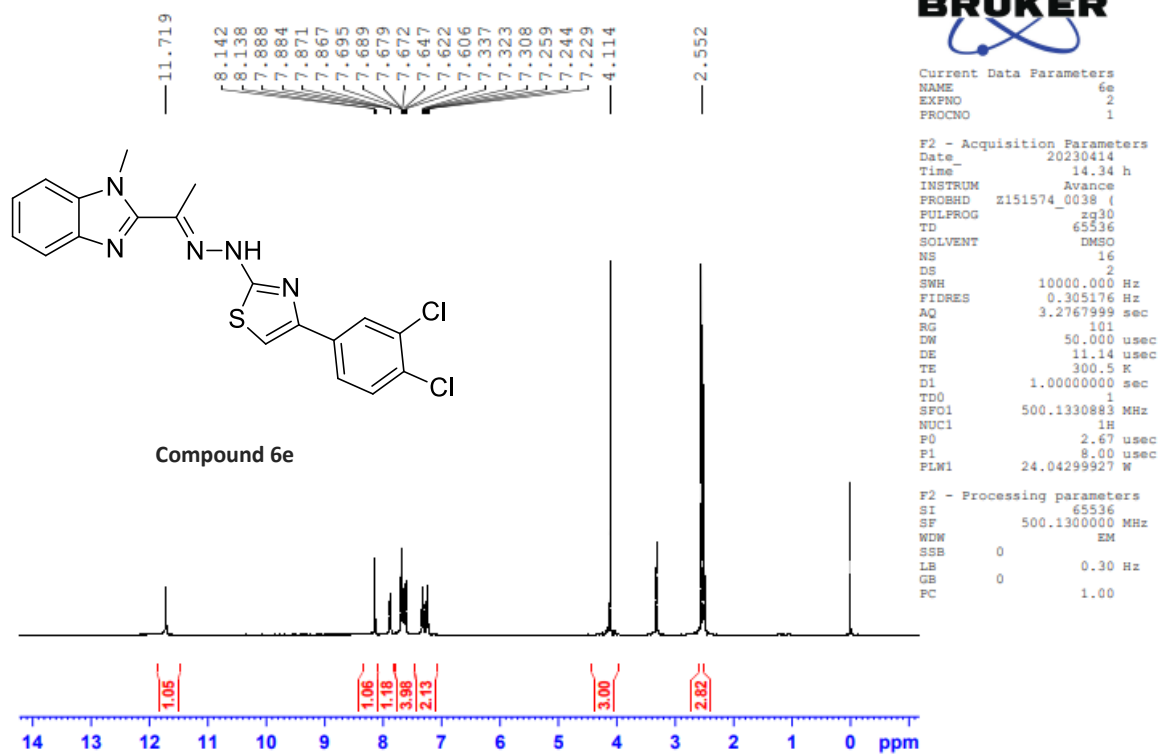

Figure S1-27. <sup>1</sup>H-NMR spectrum of compound 6e

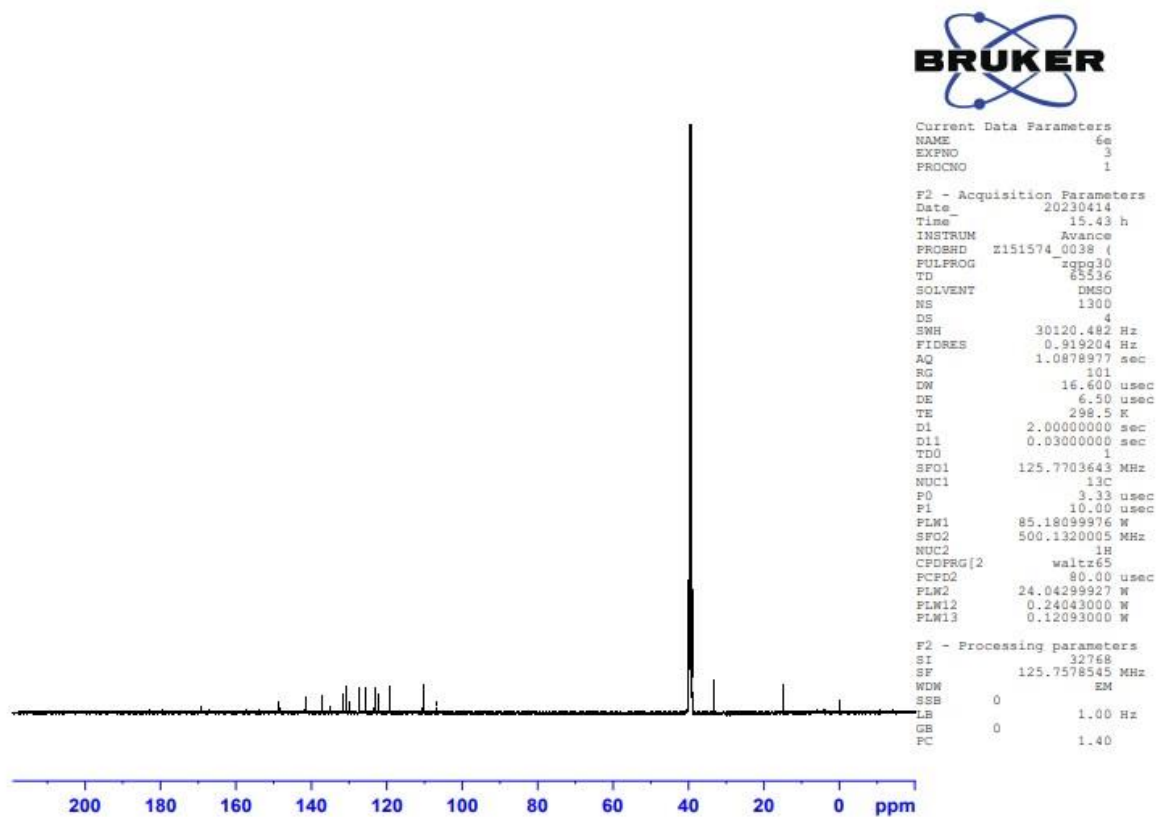

Figure S1-28. <sup>13</sup>C-NMR spectrum of compound 6e

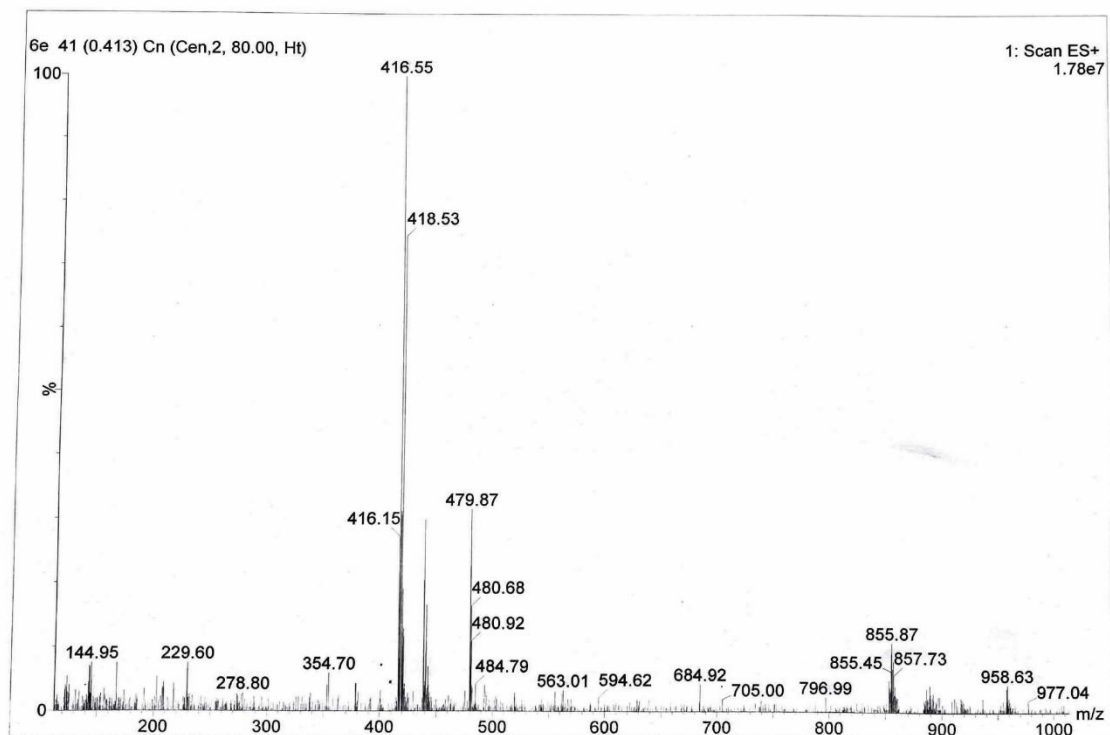

Figure S1-29. Mass spectrum of compound 6e

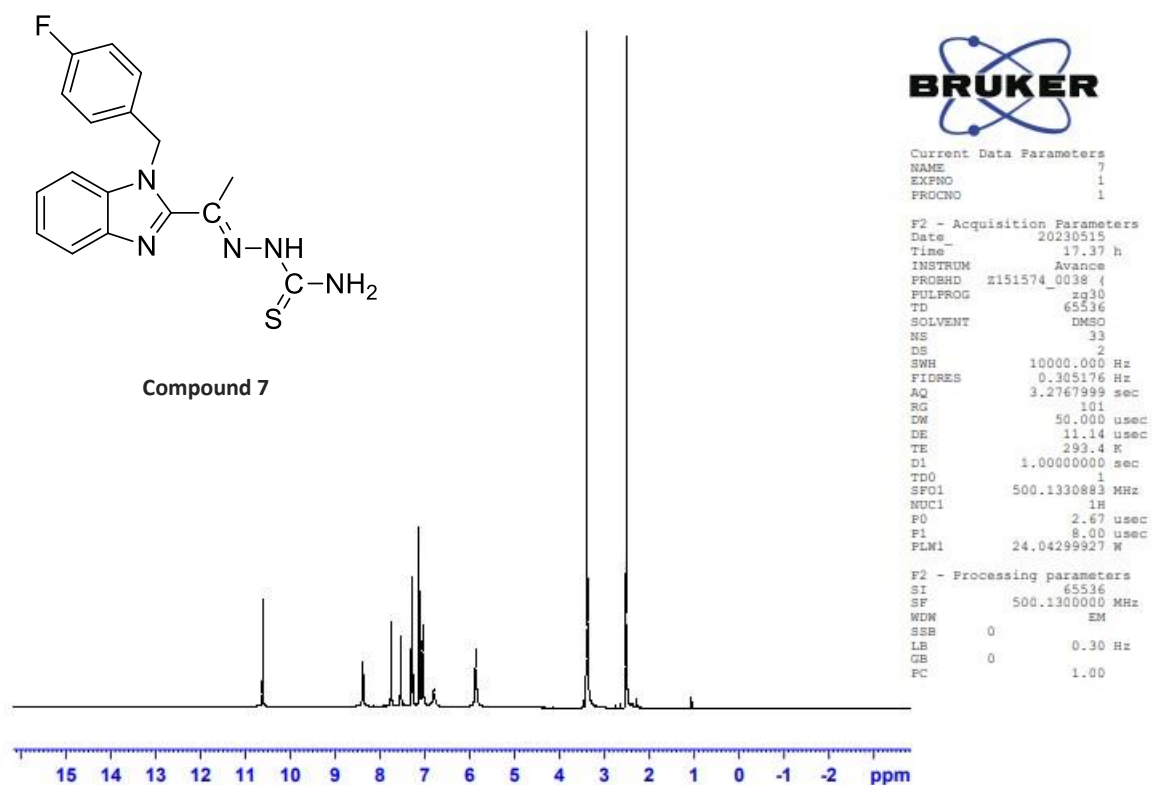

Figure S1-30. <sup>1</sup>H-NMR spectrum of compound 7-1

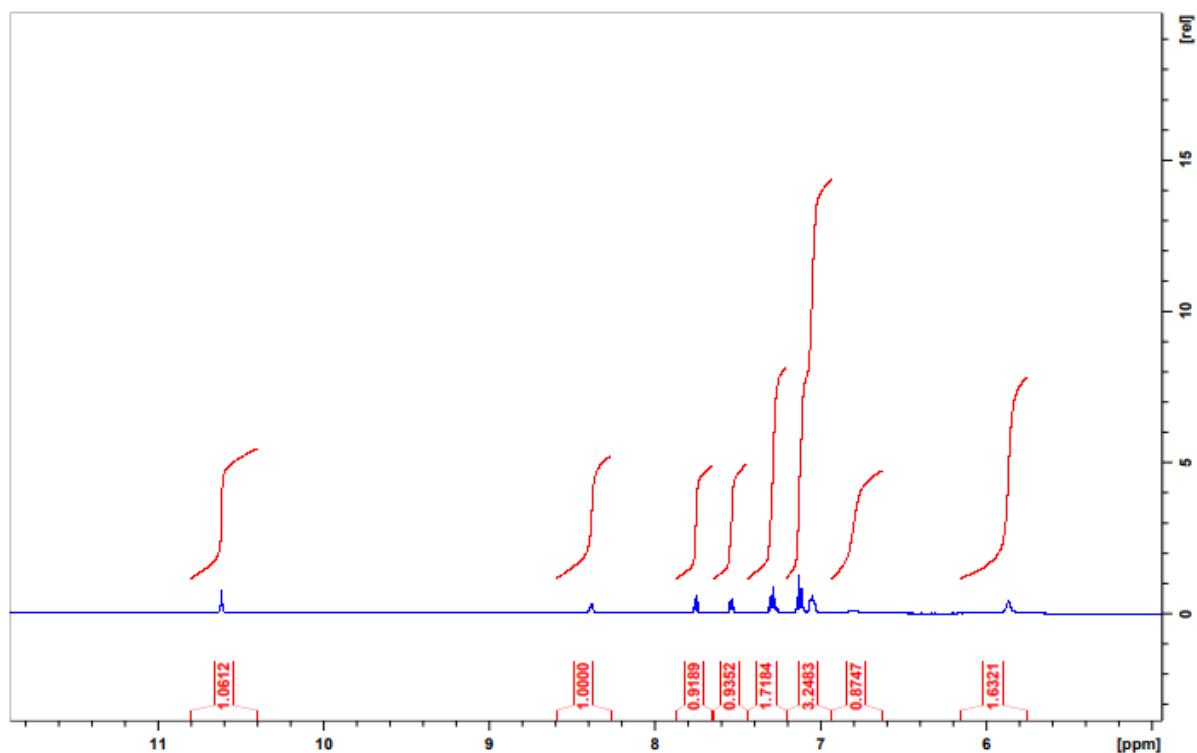

Figure S1-31. <sup>1</sup>H-NMR spectrum of compound 7-2

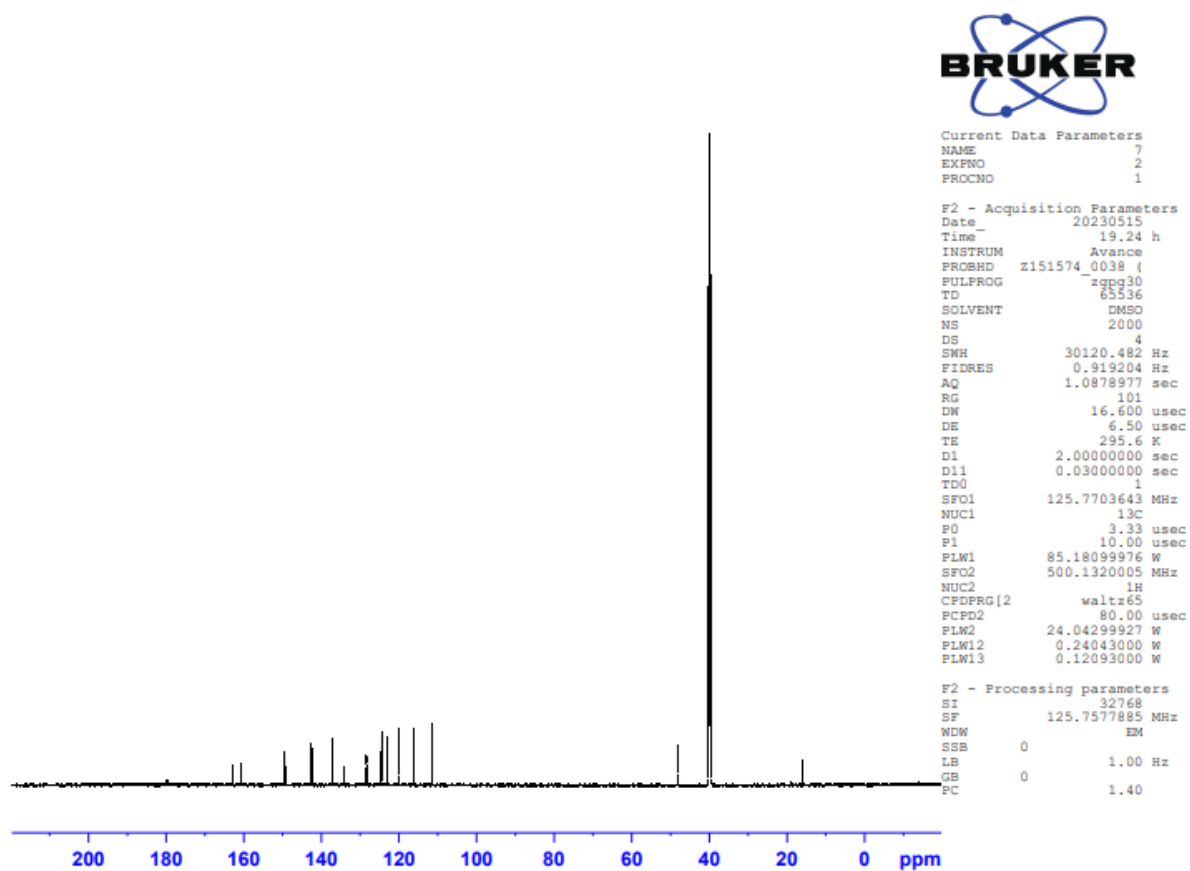

Figure S1-32. <sup>13</sup>C-NMR spectrum of compound 7

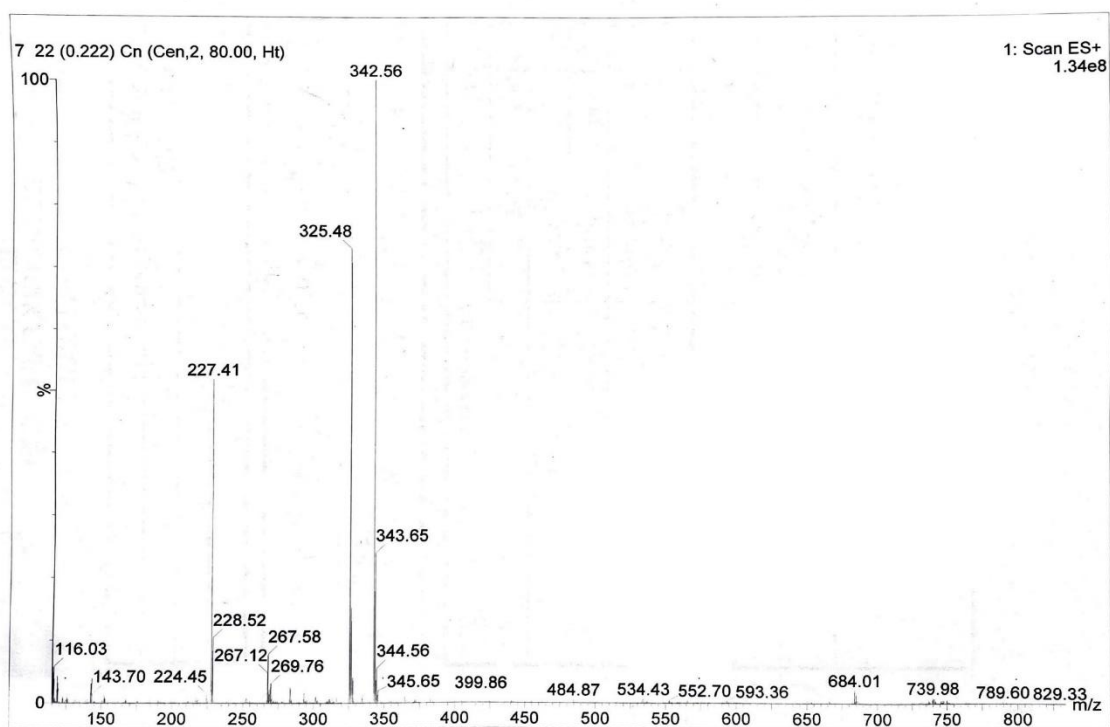

Figure S1-33. Mass spectrum of compound 7

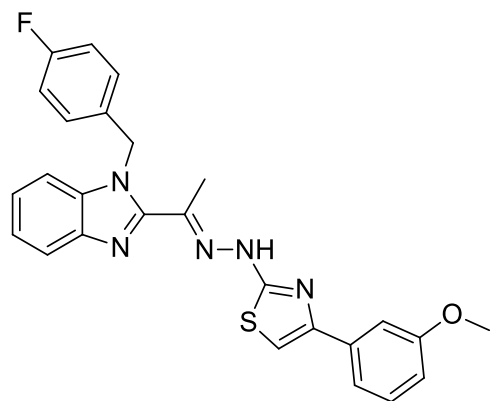

Compound 7a

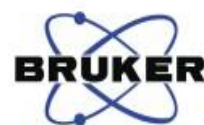

```

Current Data Parameters
NAME          7a
EXPNO         3
PROCNO        1

F2 - Acquisition Parameters
Date_         20230502
Time_        10.36 h
INSTRUM      Avance
PROBHD       Z151574_0038 (
PULPROG      zg30
TD           65536
SOLVENT      DMSO
NS           16
DS           2
SWH          10000.000 Hz
FIDRES       0.305176 Hz
AQ           3.2767999 sec
RG           101
DW           50.000 usec
DE           11.14 usec
TE           291.8 K
D1           1.00000000 sec
TD0          1
SFO1         500.1330883 MHz
NUC1         1H
P0           2.67 usec
P1           8.00 usec
PLW1         24.04299927 W

F2 - Processing parameters
SI           65536
SF           500.1330000 MHz
WDW          EM
SSB          0
LB           0.30 Hz
GB           0
PC           1.00
  
```

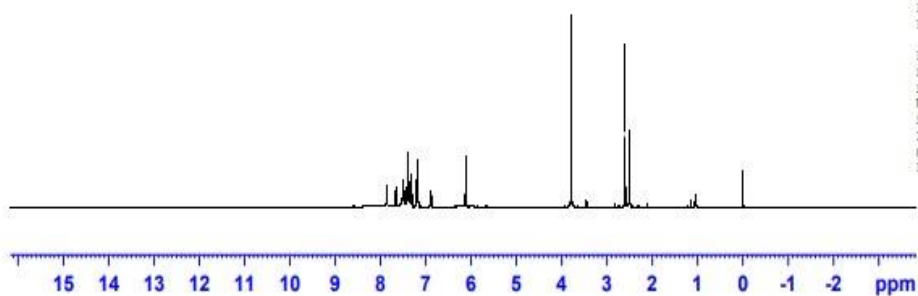

Figure S1-34. <sup>1</sup>H-NMR spectrum of compound 7a-1

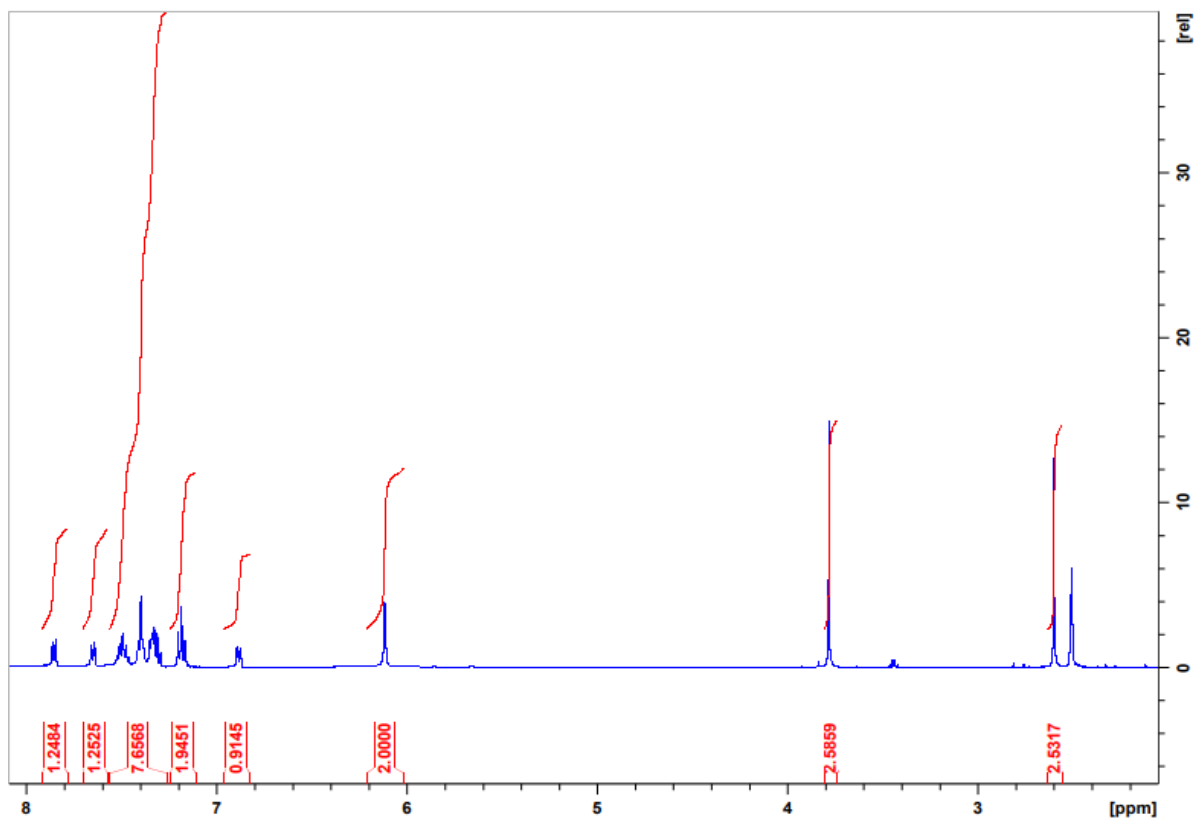

Figure S1-35. <sup>1</sup>H-NMR spectrum of compound 7a-2

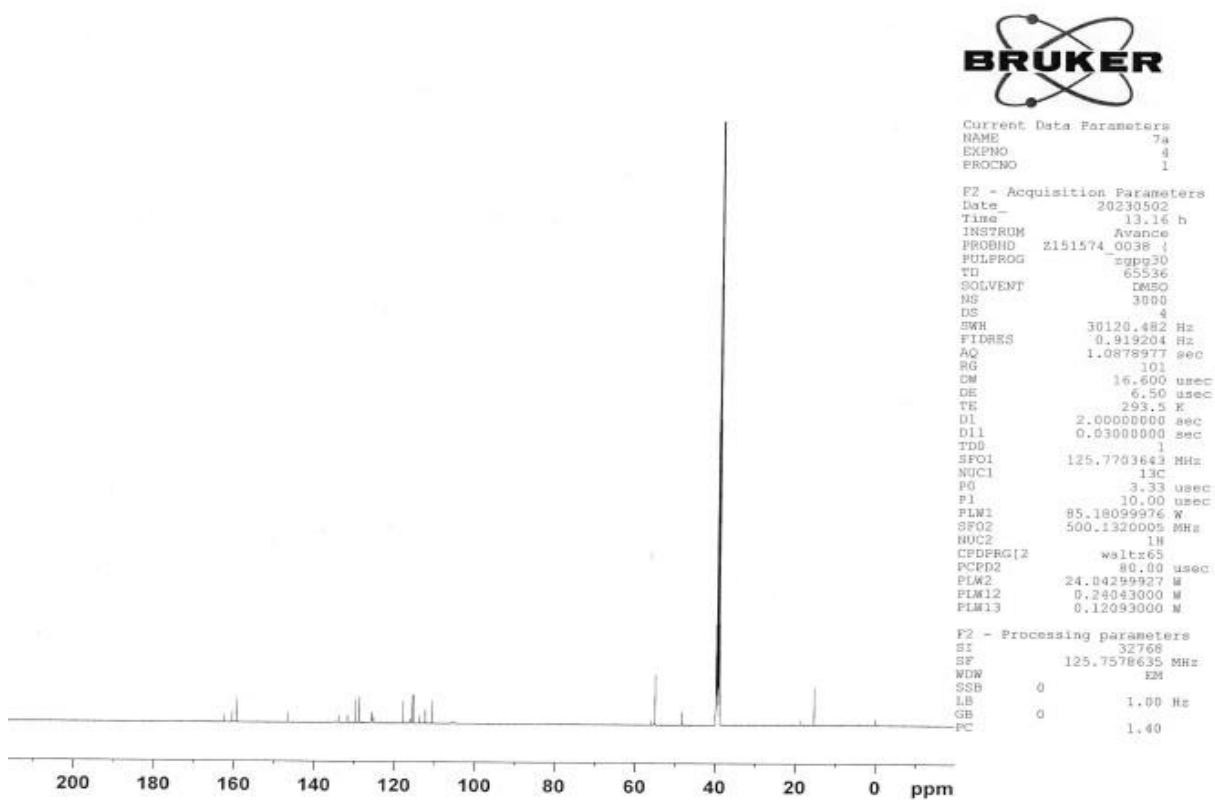

Figure S1-36. <sup>13</sup>C-NMR spectrum of compound 7a

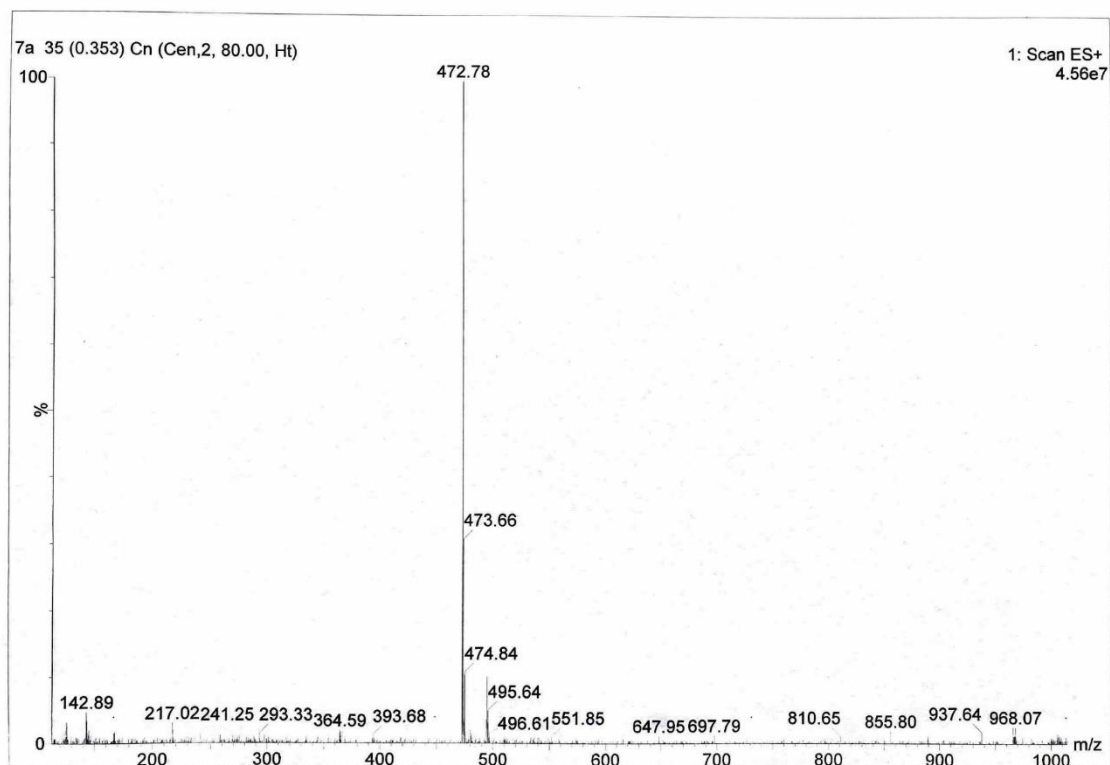

Figure S1-37. Mass spectrum of compound 7a

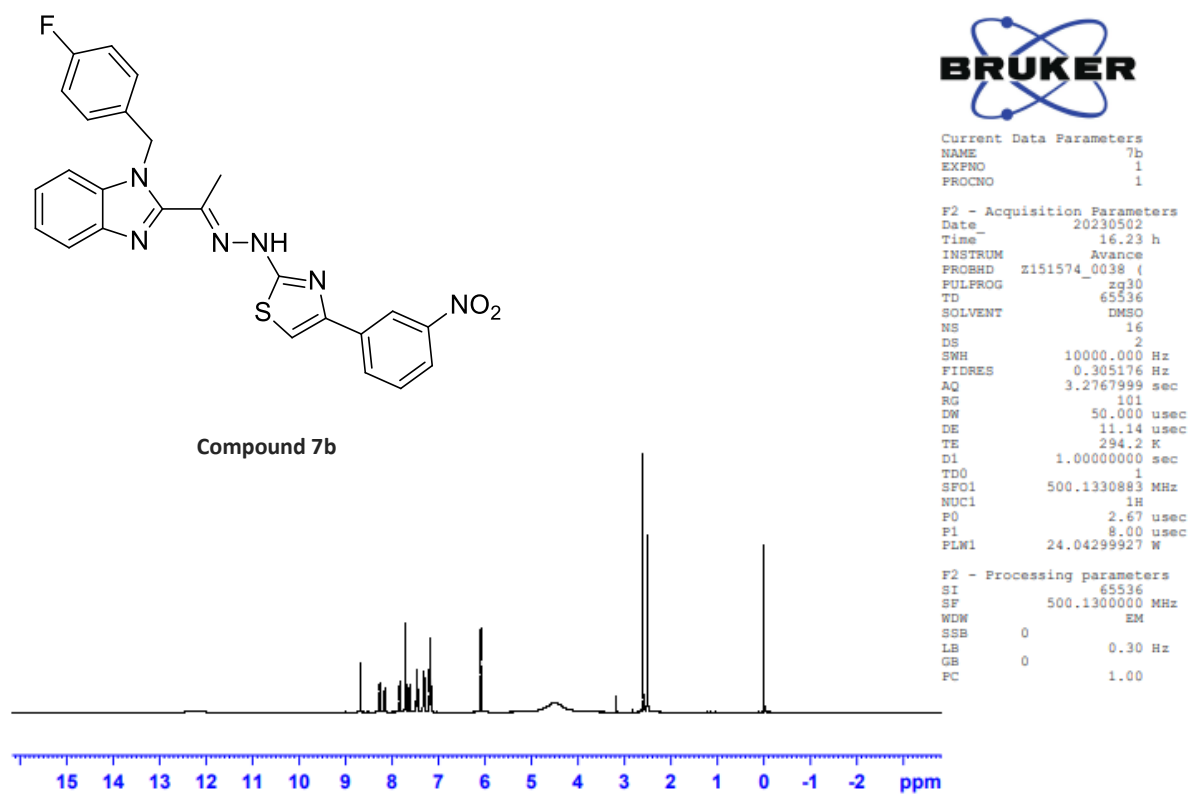

Figure S1-38.  $^1\text{H-NMR}$  spectrum of compound 7b-1

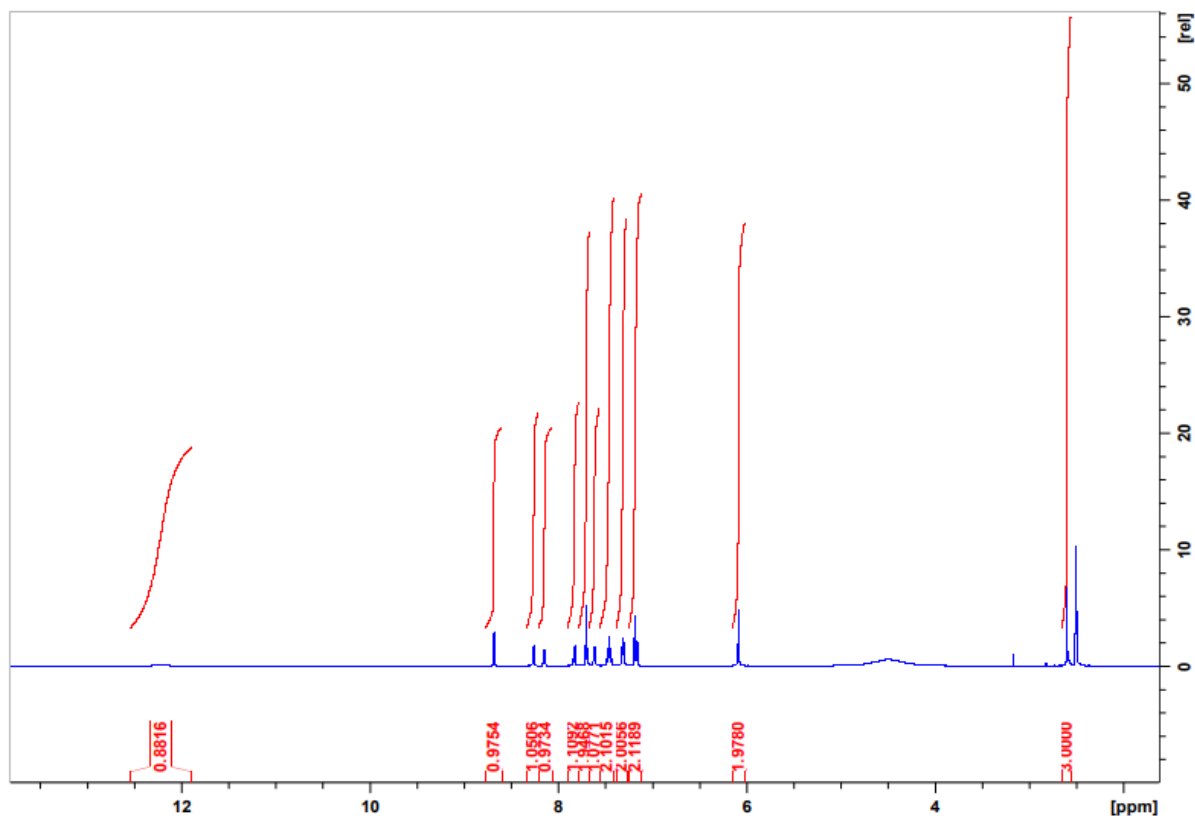

Figure S1-39.  $^1\text{H}$ -NMR spectrum of compound **7b-2**

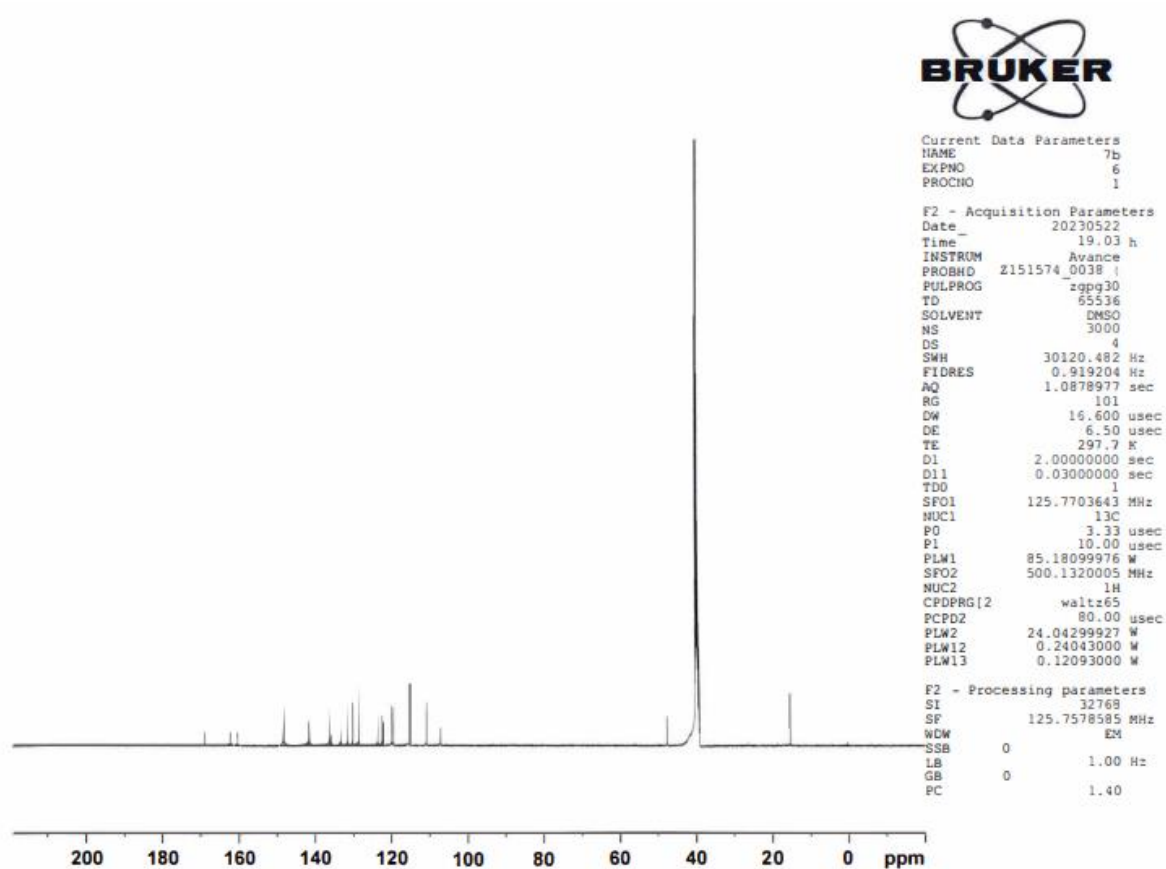

Figure S1-40.  $^{13}\text{C}$ -NMR spectrum of compound **7b**



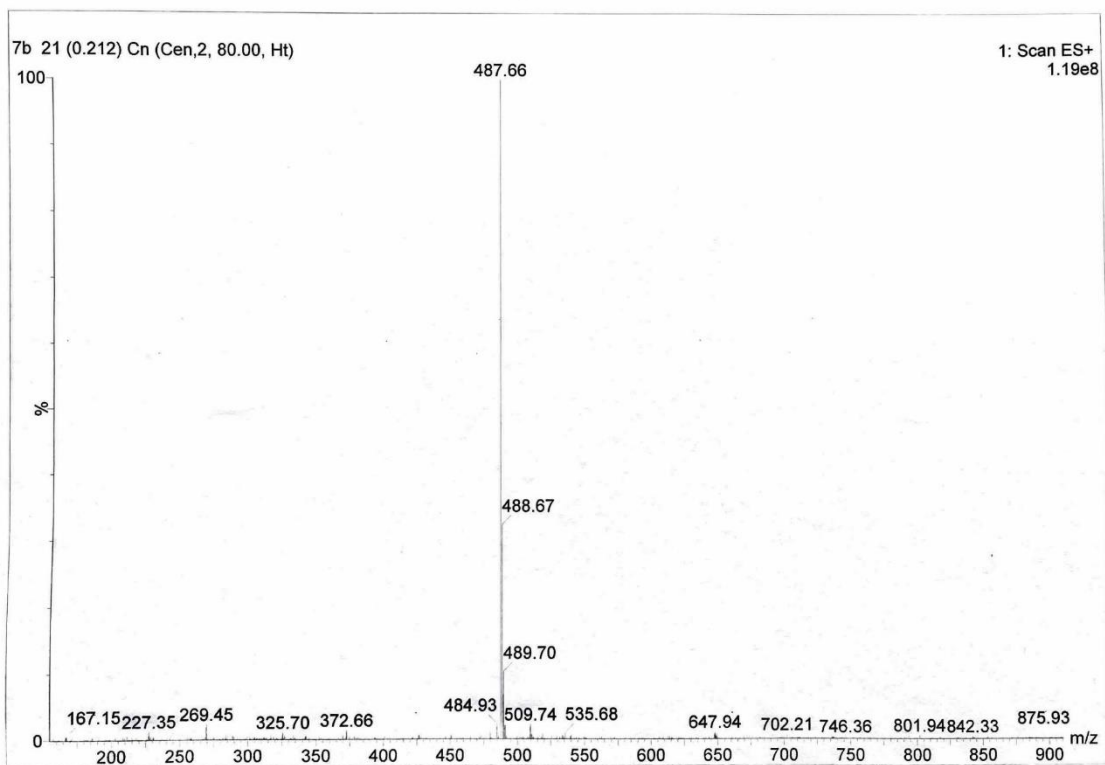

Figure S1-41. Mass spectrum of compound 7b

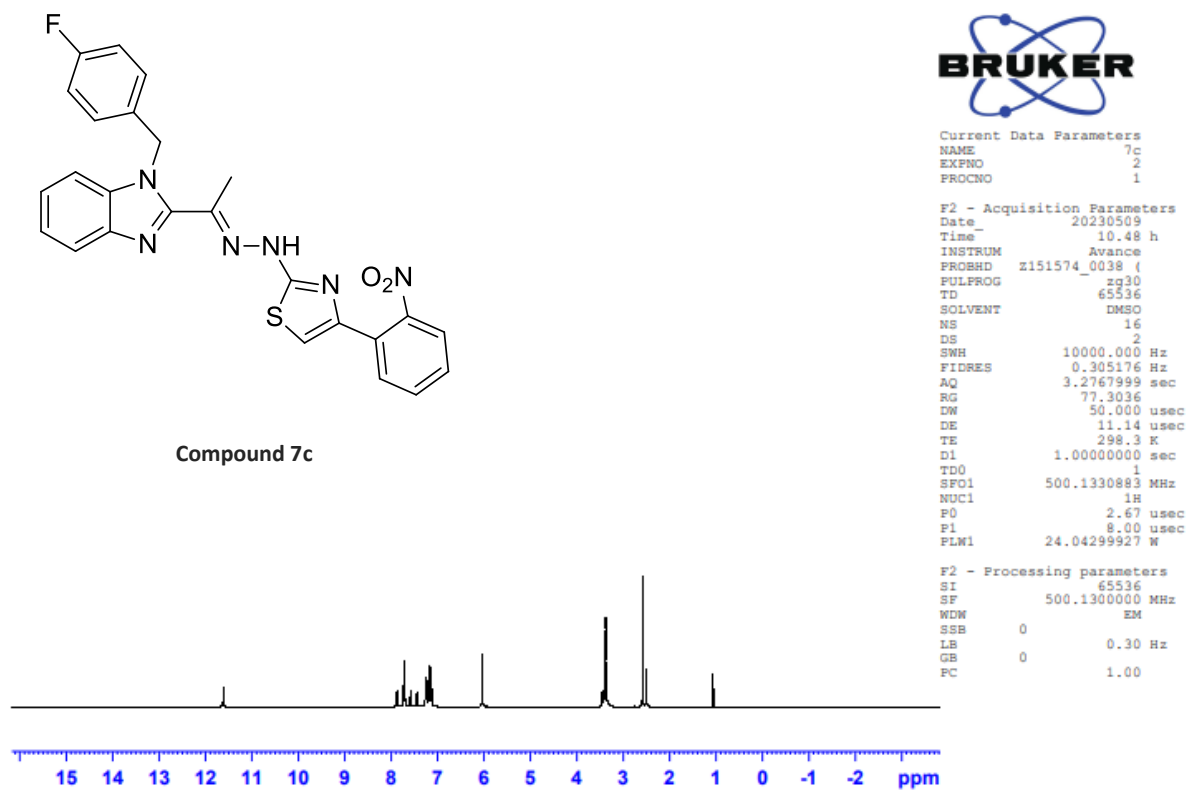

Figure S1-42. <sup>1</sup>H-NMR spectrum of compound 7c-1

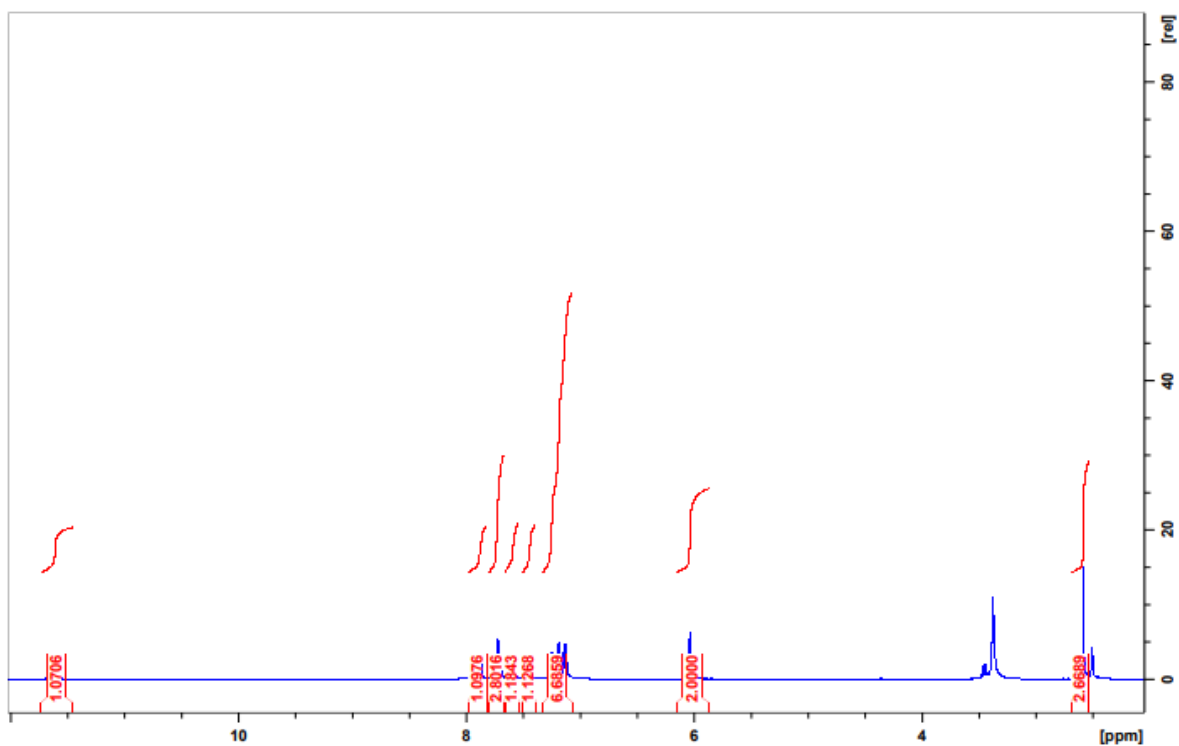

Figure S1-43. <sup>1</sup>H-NMR spectrum of compound 7c-2

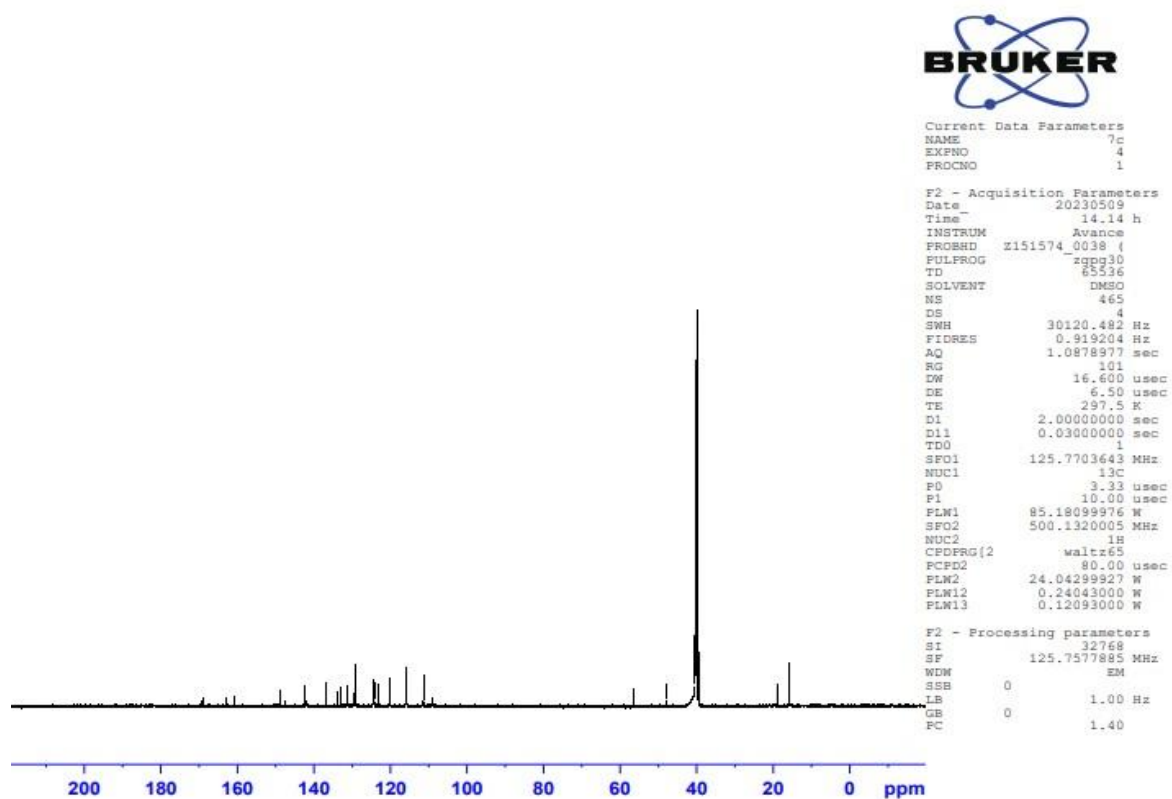

Figure S1-44. <sup>13</sup>C-NMR spectrum of compound 7c

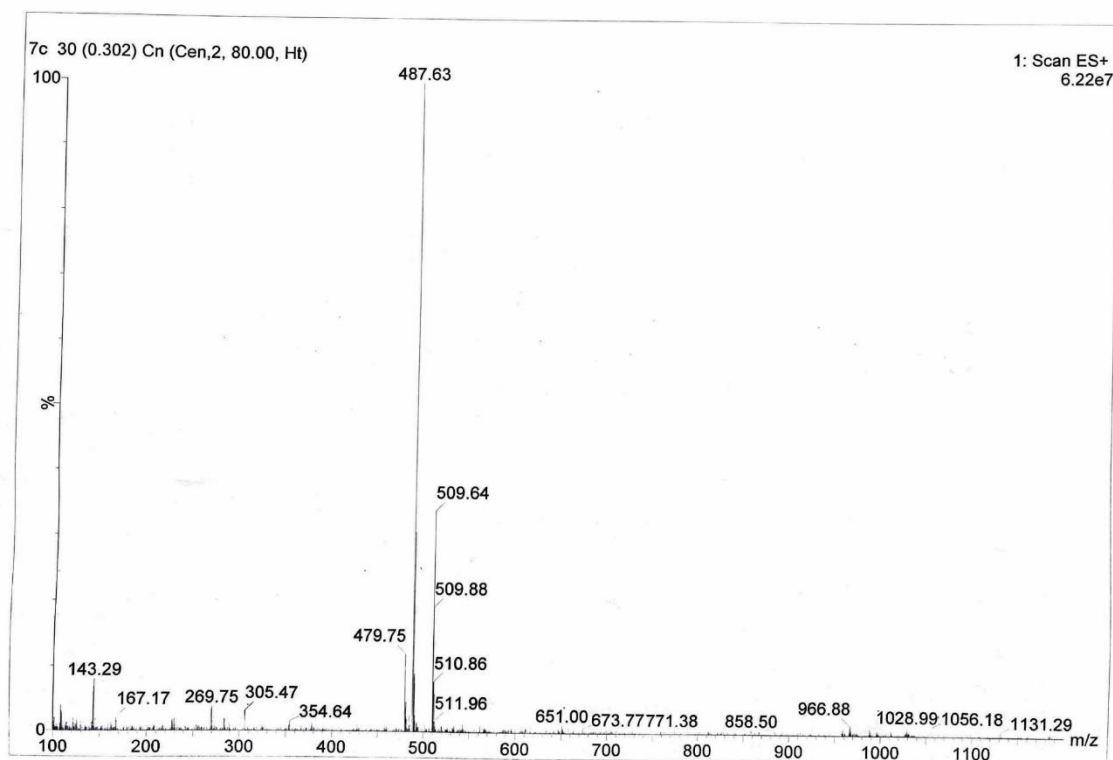

Figure S1-45. Mass spectrum of compound 7c

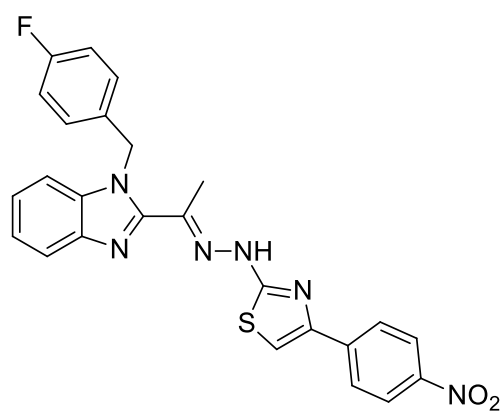

Compound 7d

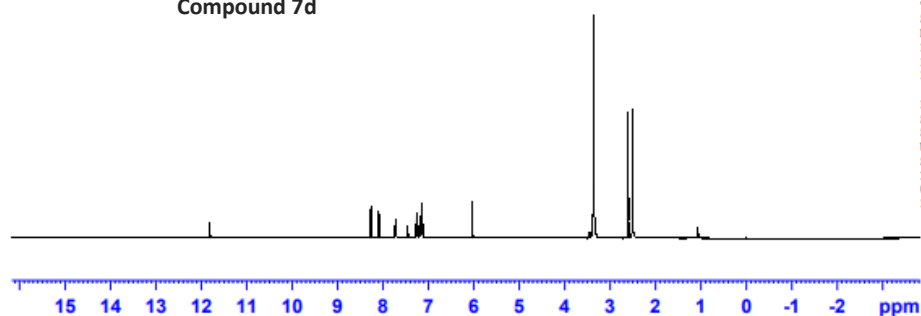

Figure S1-46. <sup>1</sup>H-NMR spectrum of compound 7d-1

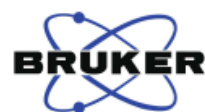

Current Data Parameters  
NAME 7d  
EXPNO 1  
PROCNO 1

F2 - Acquisition Parameters  
Date\_ 20230508  
Time 10.24 h  
INSTRUM Avance  
PROBHD z151574\_0038 (zq30)  
PULPROG zg30  
TD 65536  
SOLVENT DMSO  
NS 16  
DS 2  
SWH 10000.000 Hz  
FIDRES 0.305176 Hz  
AQ 3.2767999 sec  
RG 101  
DW 50.000 usec  
DE 11.14 usec  
TE 294.9 K  
D1 1.00000000 sec  
TDO 1  
SFO1 500.1330893 MHz  
NUC1 1H  
P0 2.67 usec  
P1 8.00 usec  
PLM1 24.04299927 W

F2 - Processing parameters  
SI 65536  
SF 500.1300000 MHz  
WDW EM  
SSB 0  
LB 0.30 Hz  
GB 0  
FC 1.00

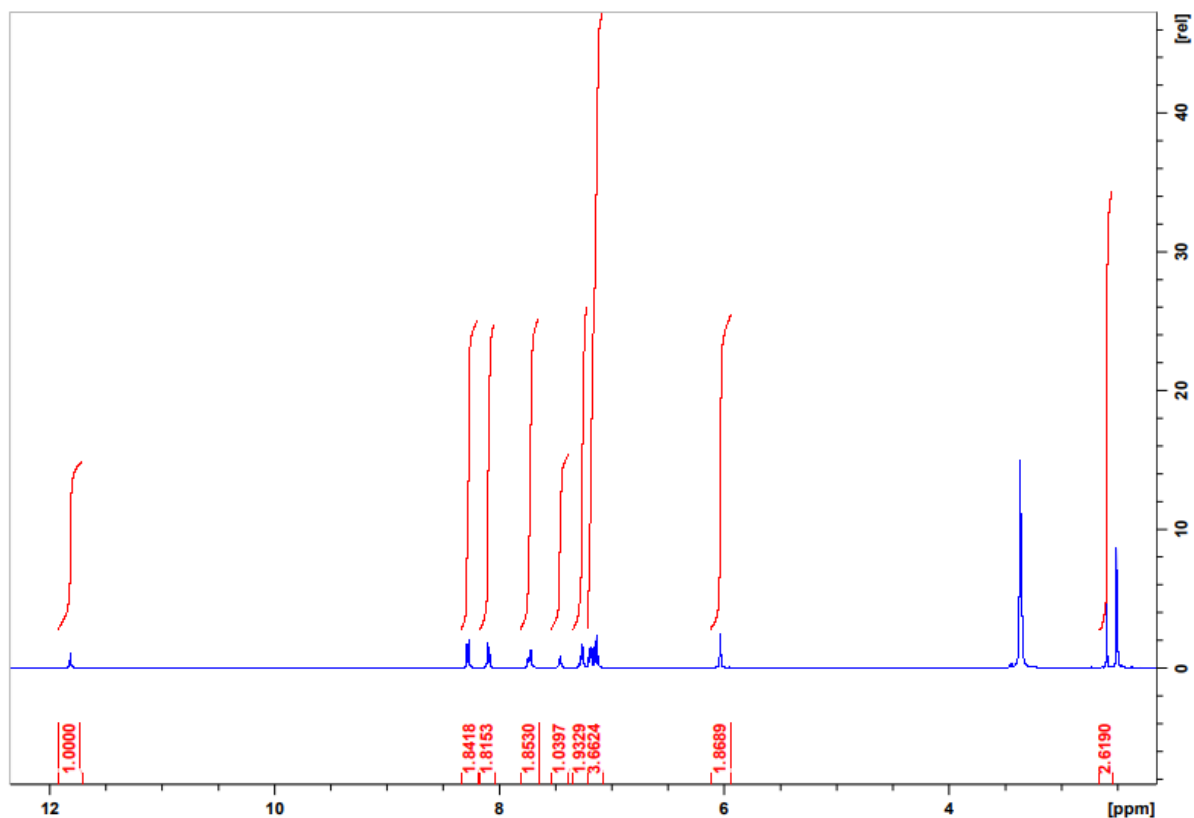

Figure S1-47. <sup>1</sup>H-NMR spectrum of compound 7d-2

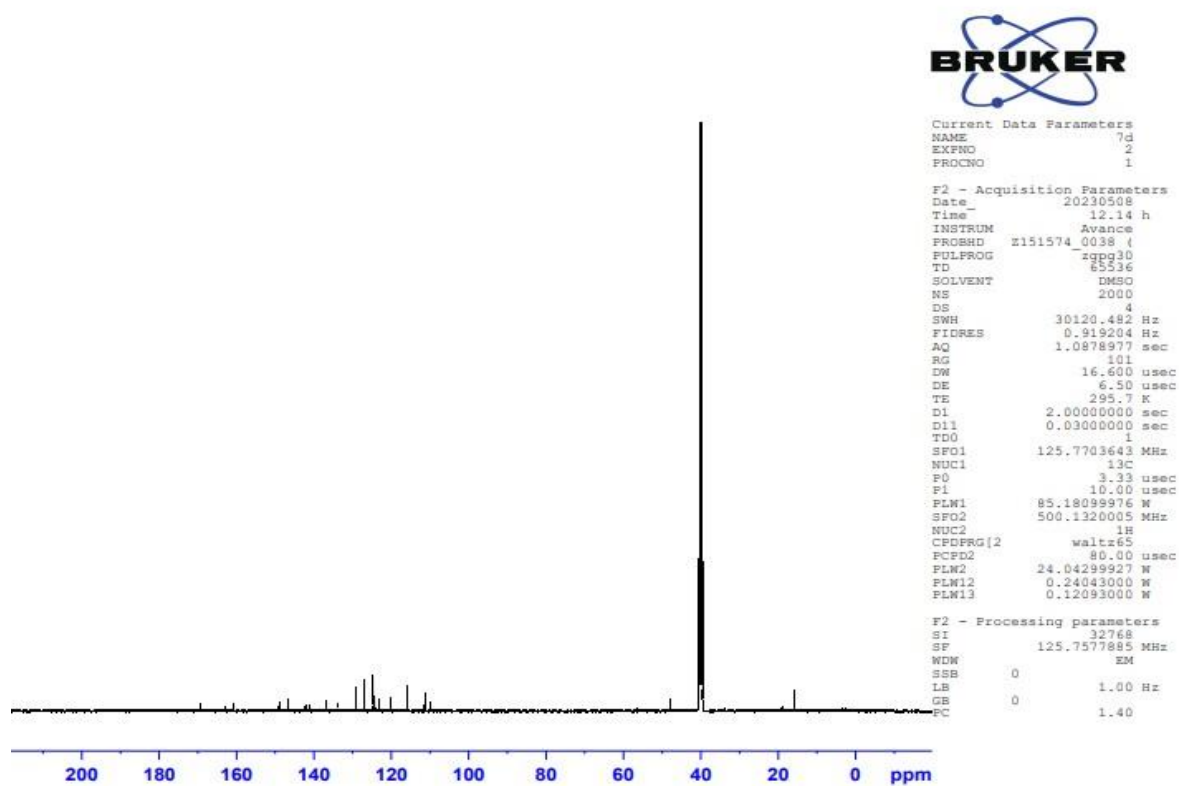

Figure S1-48. <sup>13</sup>C-NMR spectrum of compound 7d

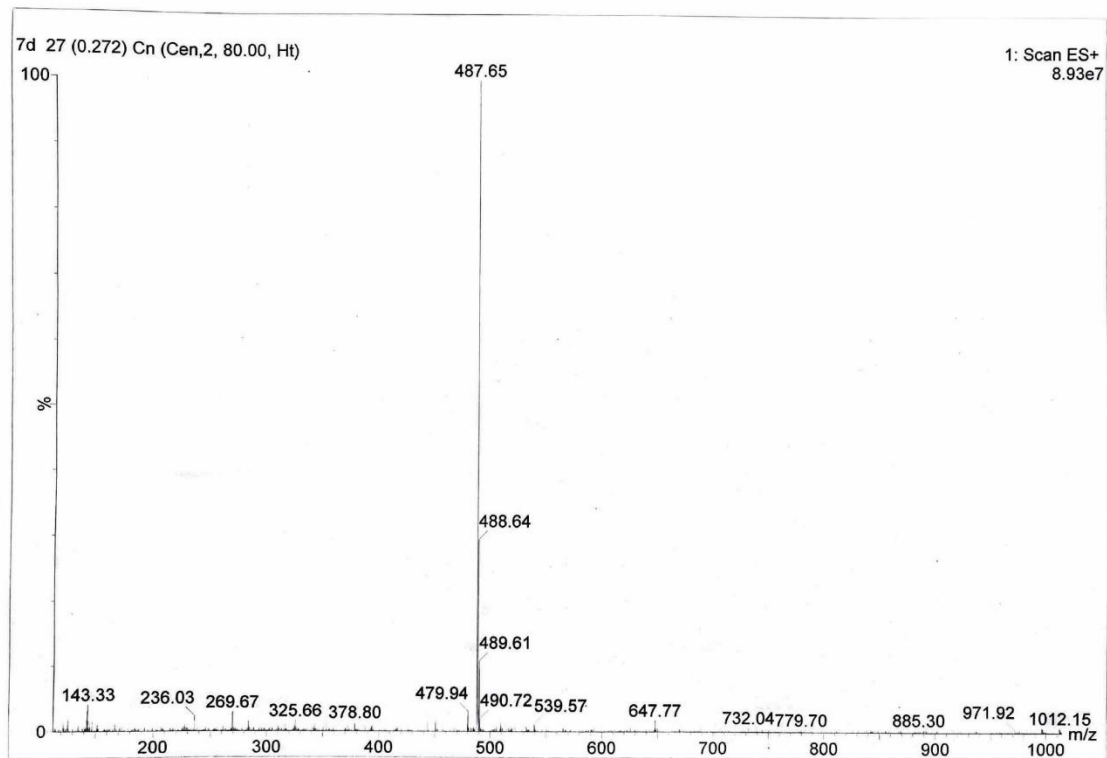

Figure S1-49. Mass spectrum of compound 7d

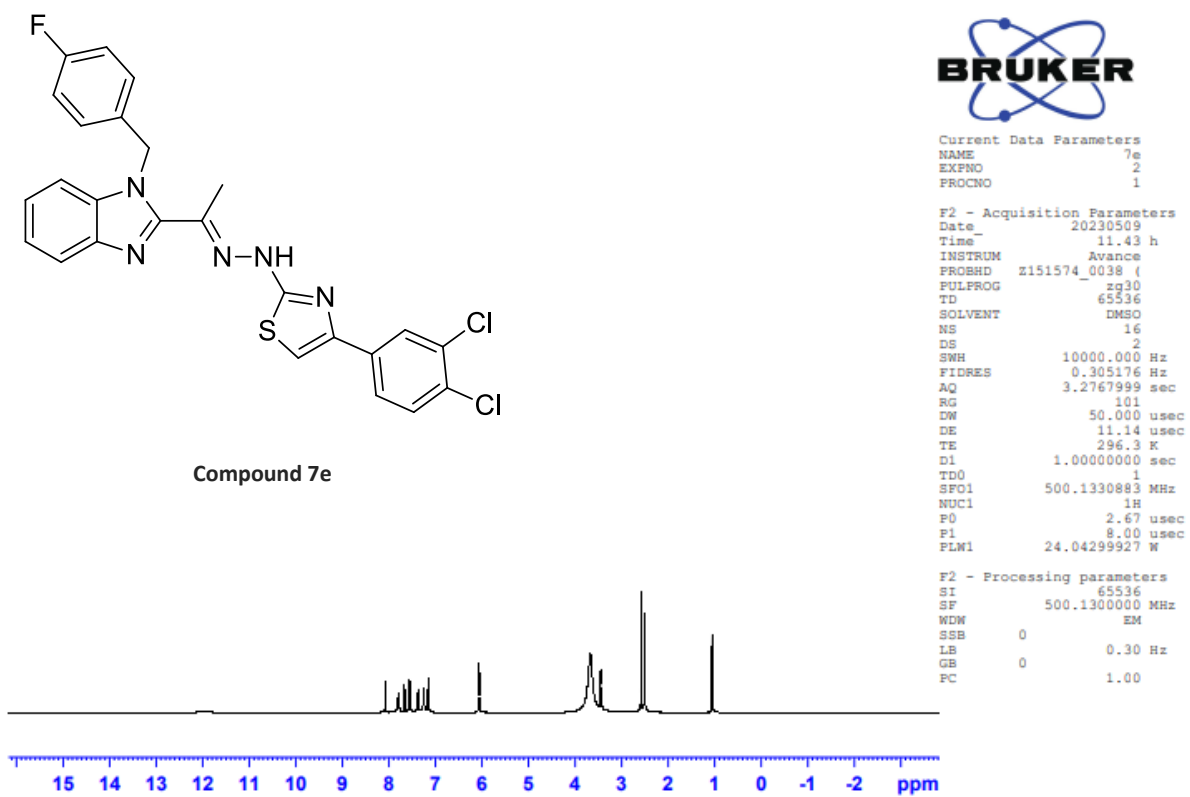

Figure S1-50. <sup>1</sup>H-NMR spectrum of compound 7e-1

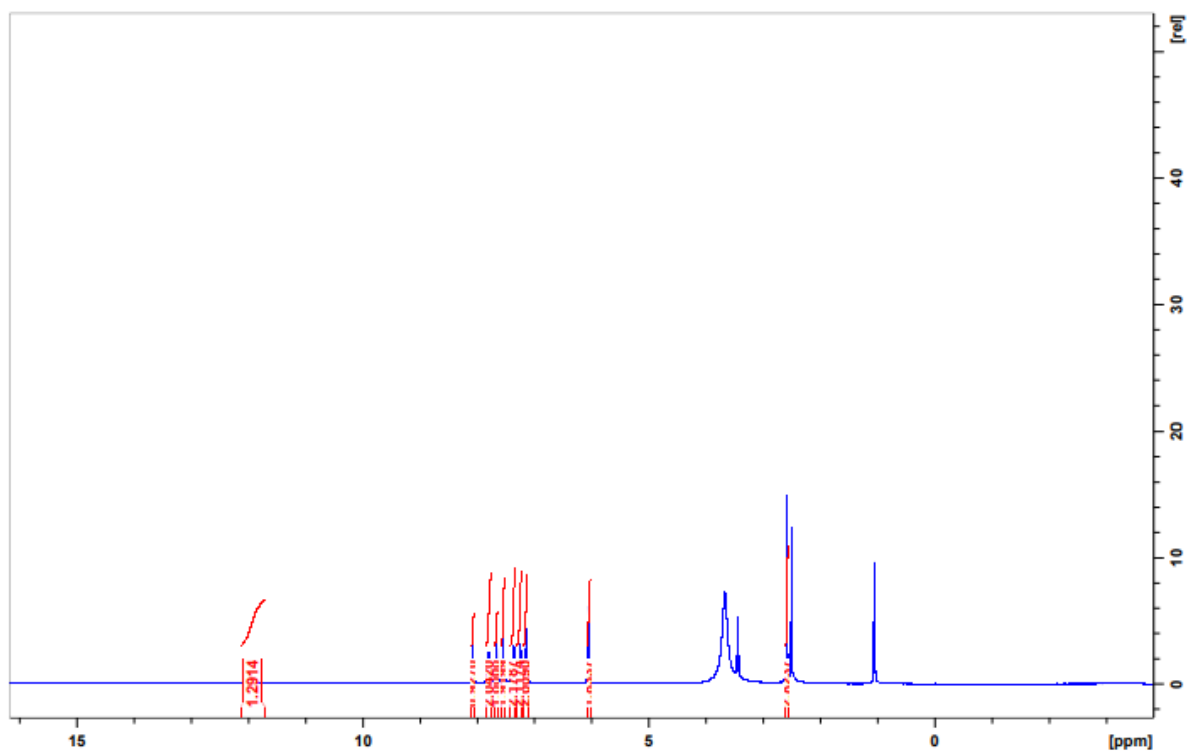

Figure S1-51. <sup>1</sup>H-NMR spectrum of compound 7e-2

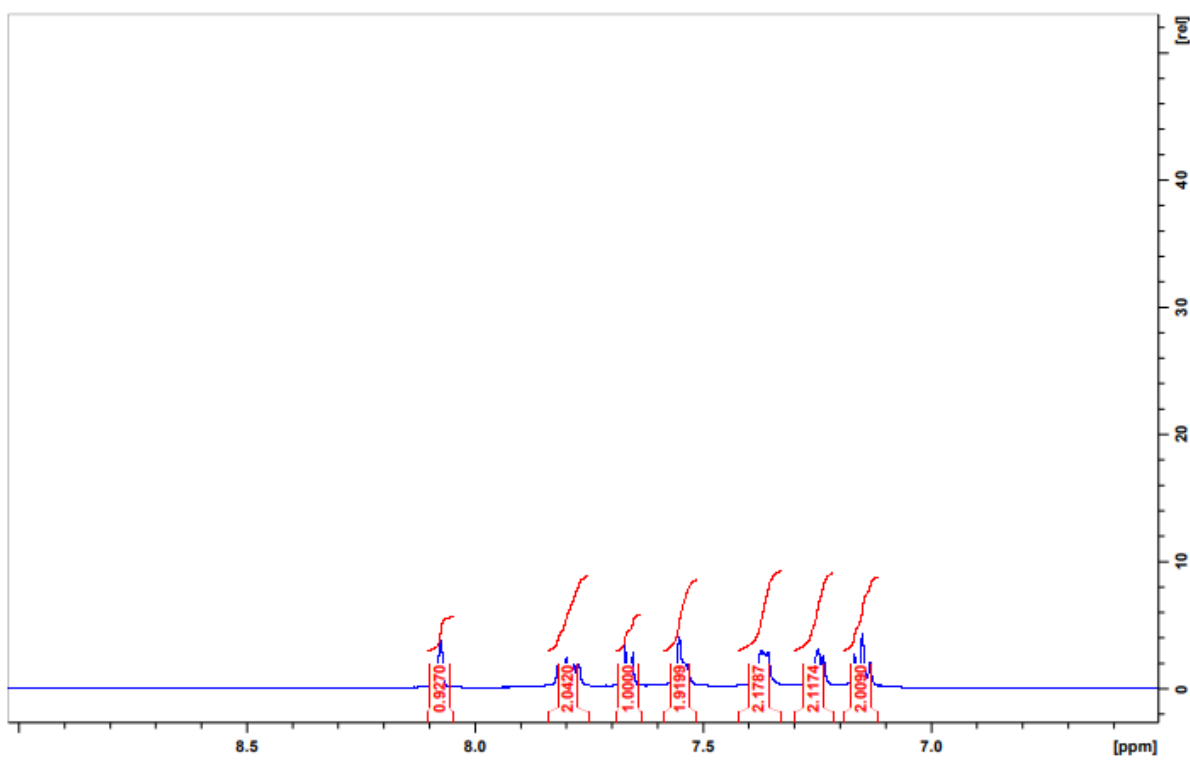

Figure S1-52. <sup>1</sup>H-NMR spectrum of compound 7e-3

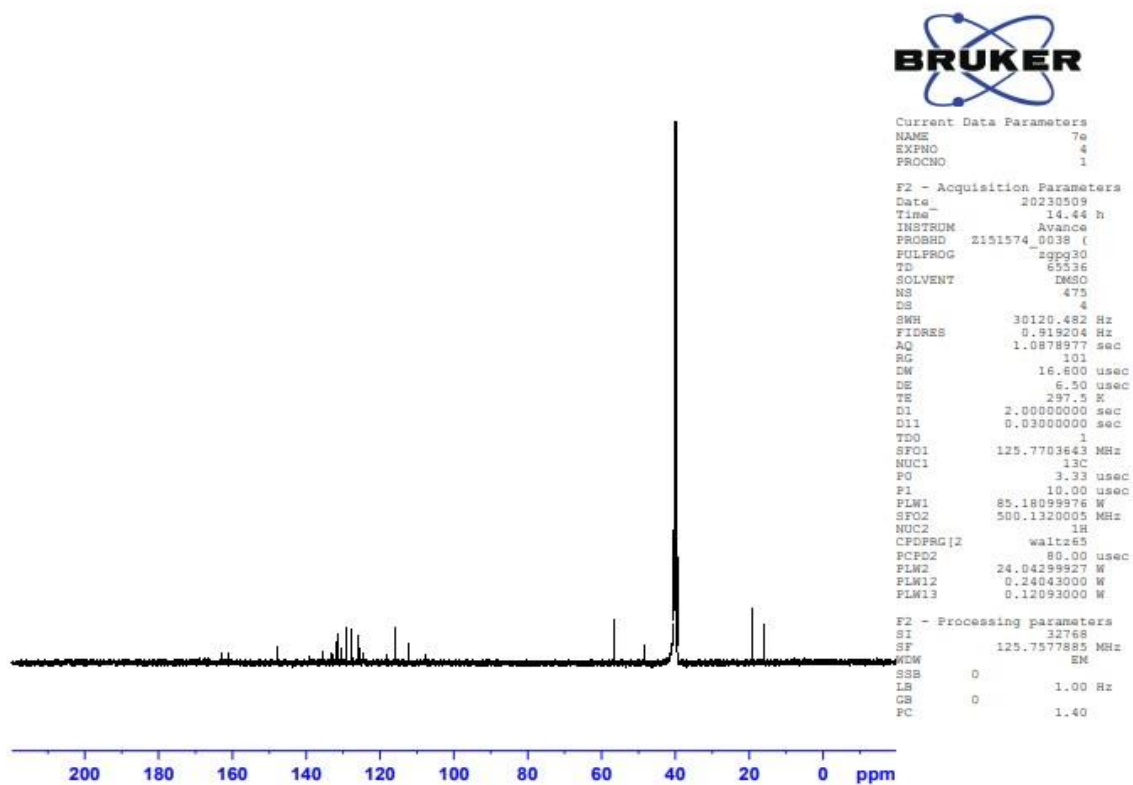

Figure S1-53.  $^{13}\text{C}$ -NMR spectrum of compound 7e

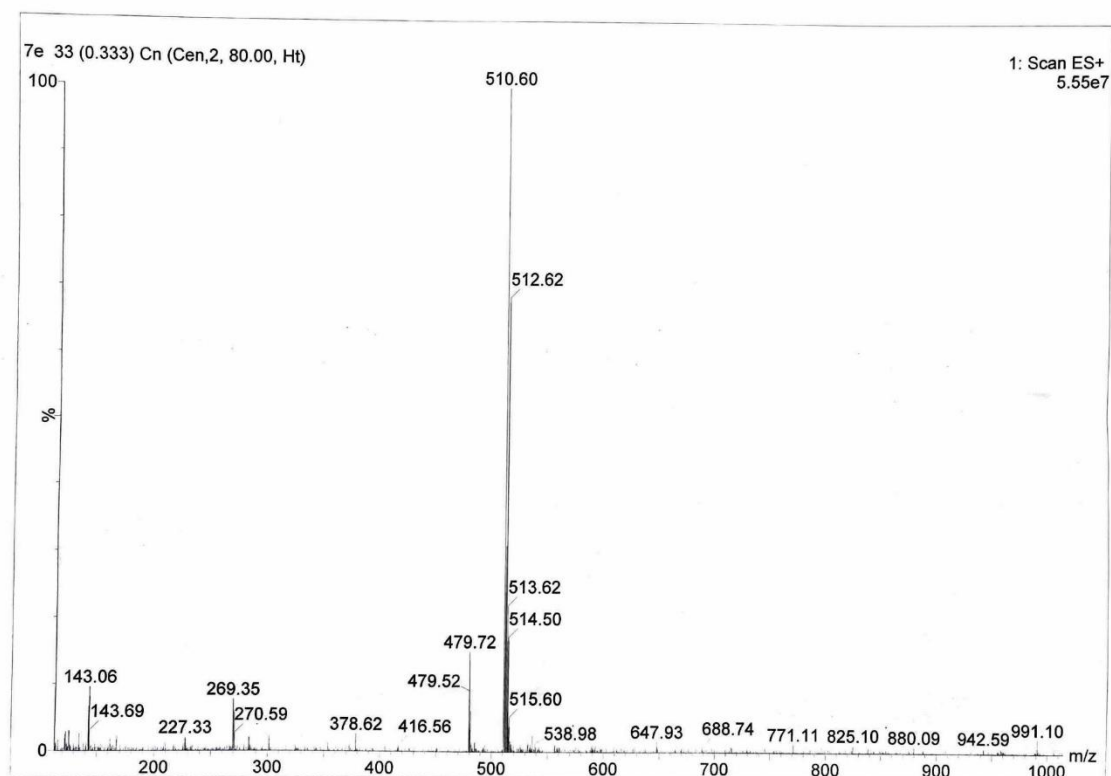

Figure S1-54. Mass spectrum of compound 7e

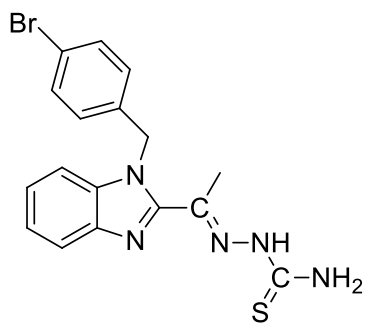

Compound 8

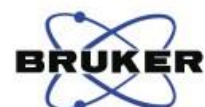

```

Current Data Parameters
NAME          8
EXPNO        4
PROCNO       1

F2 - Acquisition Parameters
Date_         20230517
Time_        14.14 h
INSTRUM      Avance
PROBHD       Z151574_0038 (
PULPROG      zg30
TD           65536
SOLVENT      DMSO
NS           16
DS           2
SWH          10000.000 Hz
FIDRES       0.305176 Hz
AQ           3.2767999 sec
RG           101
DW           50.000 usec
DE           11.14 usec
TE           295.4 K
D1           1.0000000 sec
TDO          1
SF01         500.1330883 MHz
NUC1         1H
P0           2.67 usec
P1           8.00 usec
PLW1         24.04299927 W

F2 - Processing parameters
SI           65536
SF           500.1300000 MHz
WDW          EM
SSB          0
LB           0.30 Hz
GB           0
PC           1.00
  
```

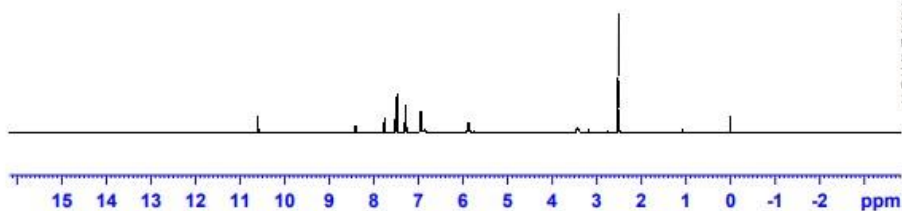

Figure S1-55. <sup>1</sup>H-NMR spectrum of compound 8-1

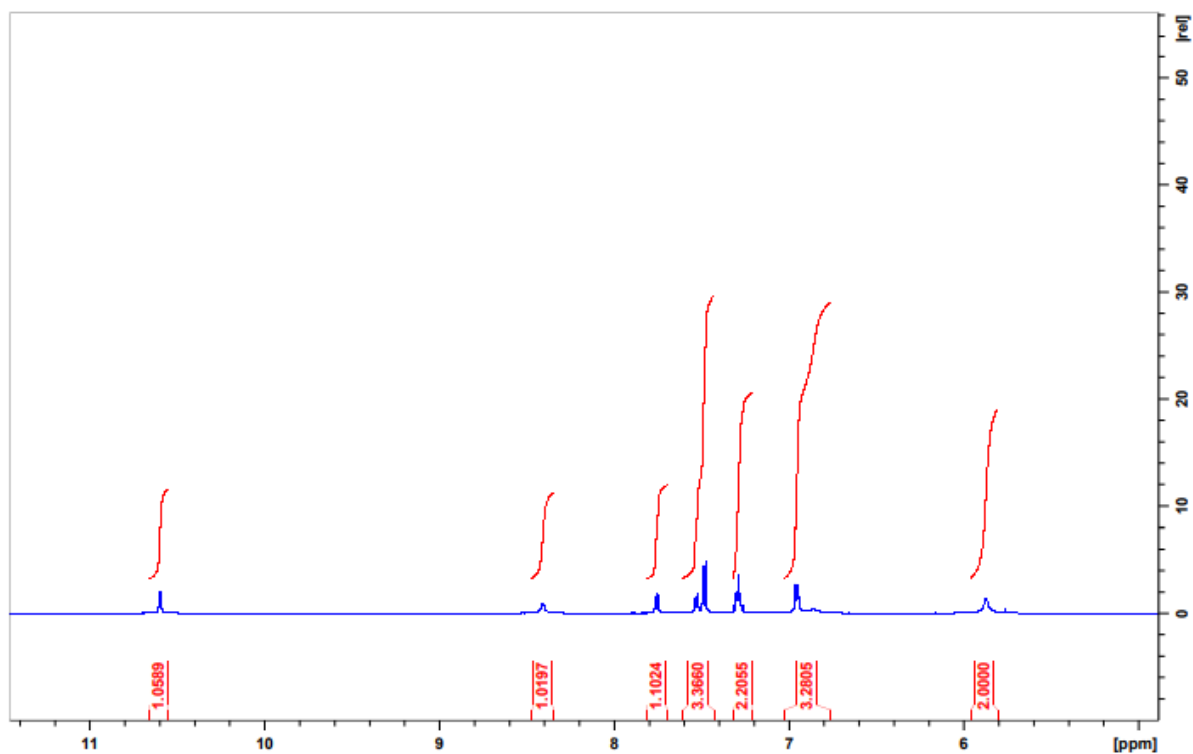

Figure S1-56. <sup>1</sup>H-NMR spectrum of compound 8-2



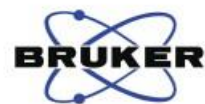

Current Data Parameters  
NAME 8  
EXPNO 1  
PROCNO 1

F2 - Acquisition Parameters  
Date\_ 20230517  
Time 13.38 h  
INSTRUM Avance  
PROBHD z151574\_0038 (4  
PULPROG zgpg30  
TD 65536  
SOLVENT DMSO  
NS 1225  
DS 4  
SWH 30120.482 Hz  
FIDRES 0.919204 Hz  
AQ 1.0878977 sec  
RG 101  
DW 16.600 usec  
DE 6.50 usec  
TE 297.0 K  
D1 2.00000000 sec  
D11 0.03000000 sec  
TD0 1  
SFO1 125.7703643 MHz  
NUC1 13C  
FO 3.33 usec  
P1 10.00 usec  
PLW1 85.18099976 W  
SFO2 500.1320005 MHz  
NUC2 1H  
CPDPRG[2] waltz65  
PCPD2 80.00 usec  
PLW2 24.04299927 W  
PLW12 0.24043000 W  
PLW13 0.12093000 W

F2 - Processing parameters  
SI 32768  
SF 125.7577885 MHz  
WDW EM  
SSB 0  
LB 1.00 Hz  
GB 0  
PC 1.40

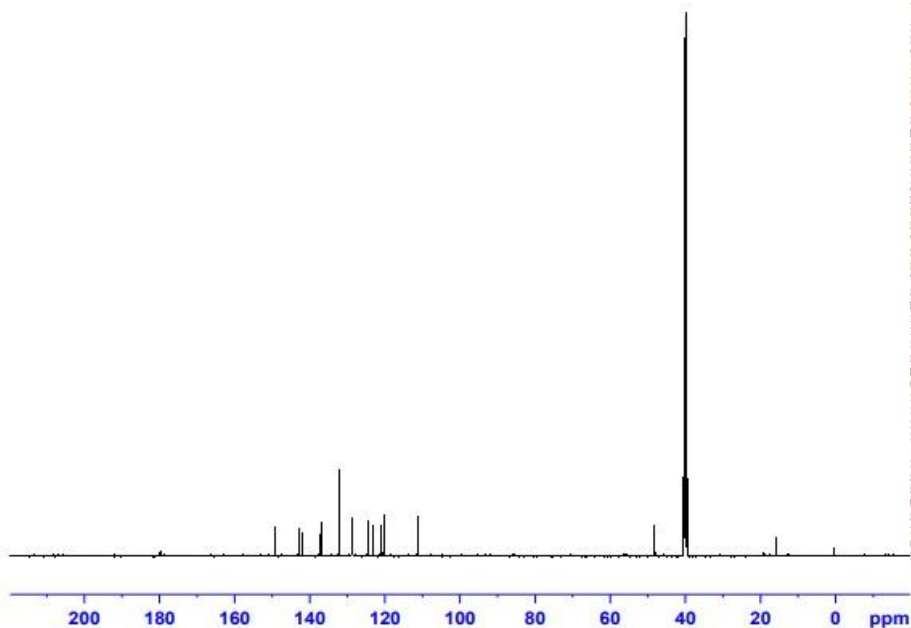

Figure S1-57. <sup>13</sup>C-NMR spectrum of compound 8

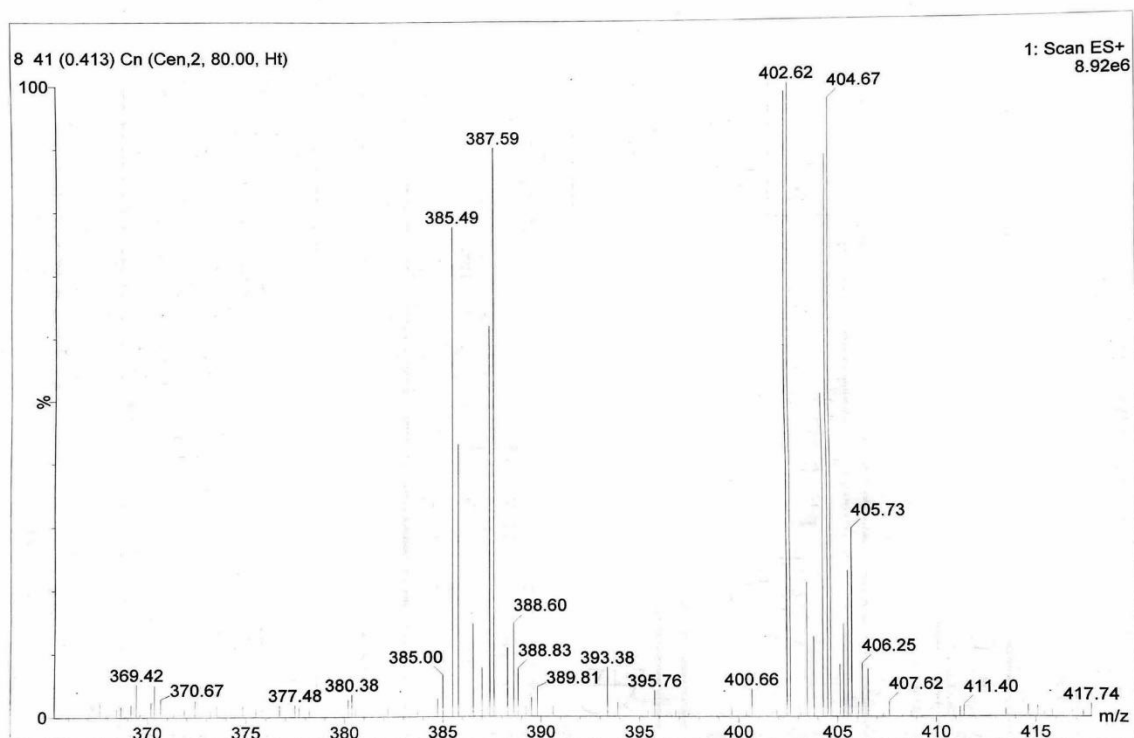

Figure S1-58. Mass spectrum of compound 8

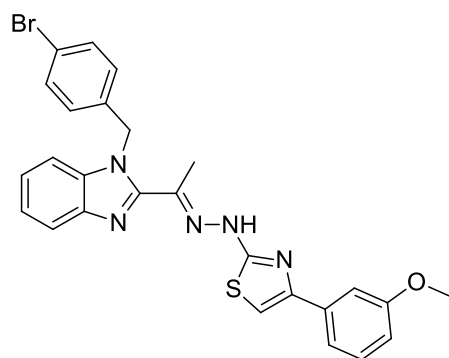

Compound 8a

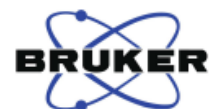

```

Current Data Parameters
NAME          8a
EXPNO        2
PROCNO       1

F2 - Acquisition Parameters
Date_        20230508
Time         16.21 h
INSTRUM      Avance
PROBHD       z151574_0038 (
FULPROG      zg30
TD           65536
SOLVENT      DMSO
NS           16
DS           2
SWH          10000.000 Hz
FIDRES       0.305176 Hz
AQ           3.2767999 sec
RG           101
DM           50.000 usec
DE           11.14 usec
TE           295.4 K
D1           1.0000000 sec
TD0          1
SFO1         500.1330883 MHz
NUC1         1H
P0           2.67 usec
F1           8.00 usec
FLM1         24.04299927 W

F2 - Processing parameters
SI           65536
SF           500.1300000 MHz
WDW          EM
SSB          0
LB           0.30 Hz
GB           0
FC           1.00
  
```

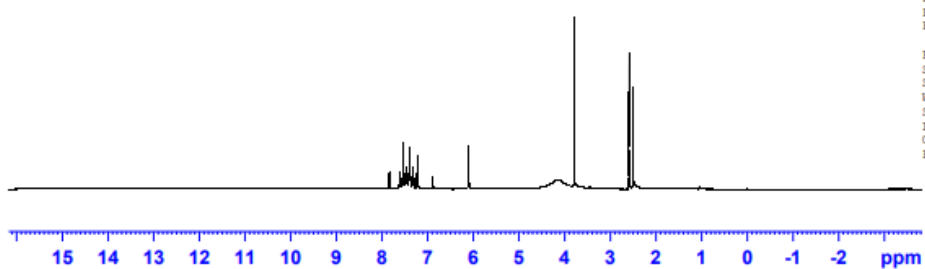

Figure S1-59. <sup>1</sup>H-NMR spectrum of compound 8a-1

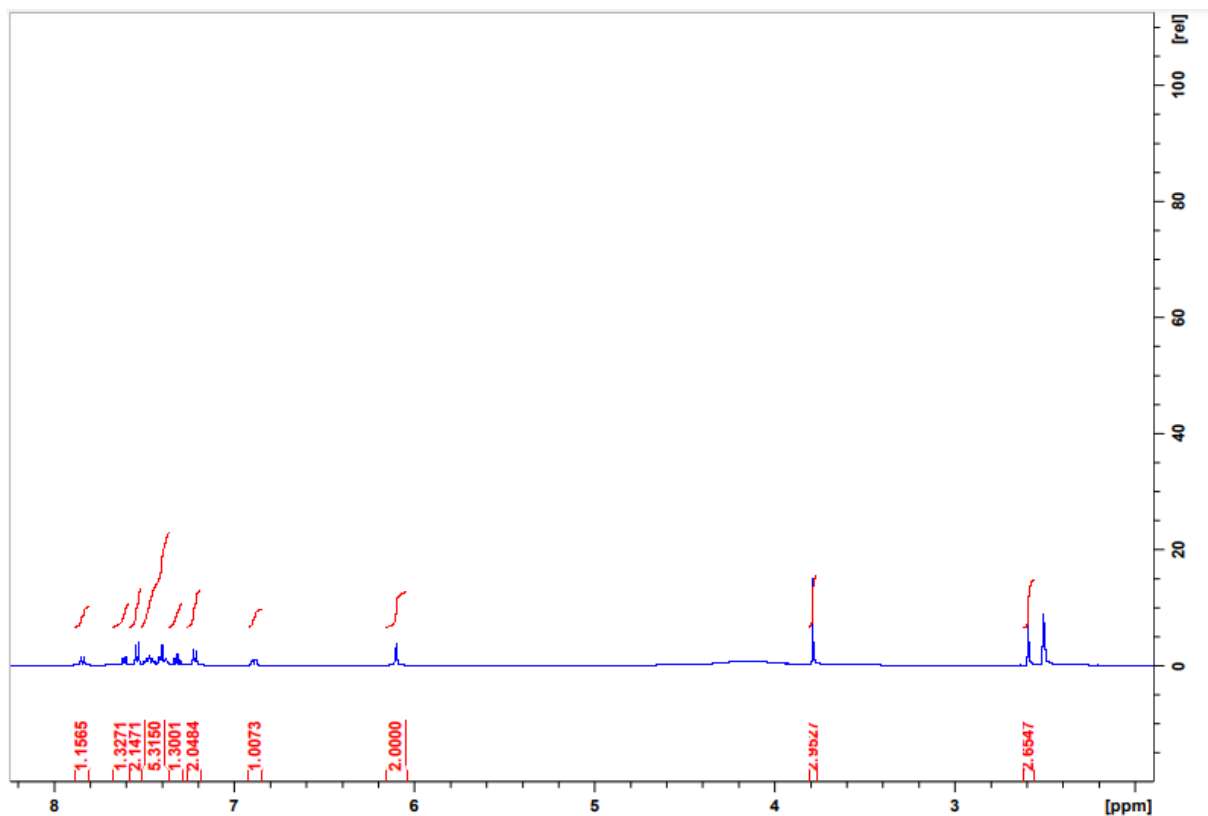

Figure S1-60. <sup>1</sup>H-NMR spectrum of compound 8a-2

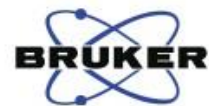

Current Data Parameters  
NAME 8a  
EXPNO 5  
PROCNO 1

F2 - Acquisition Parameters  
Date\_ 20230508  
Time\_ 18.45 h  
INSTRUM Avance  
PROBHD Z151574\_0038 (   
PULPROG zgpg30  
TD 65536  
SOLVENT DMSO  
NS 2500  
DS 4  
SWH 30120.482 Hz  
FIDRES 0.919204 Hz  
AQ 1.0878977 sec  
RG 101  
DW 16.600 usec  
DE 6.50 usec  
TE 303.5 K  
D1 2.0000000 sec  
D11 0.0300000 sec  
TD0 1  
SFO1 125.7703643 MHz  
NUC1 13C  
PO 3.33 usec  
P1 10.00 usec  
PLW1 85.18099976 W  
SFO2 500.1320005 MHz  
NUC2 1H  
CPDPRG[2] waltz65  
PCPD2 80.00 usec  
PLW2 24.04299927 W  
PLW12 0.24043000 W  
PLW13 0.12093000 W

F2 - Processing parameters  
SI 32768  
SF 125.7577885 MHz  
WDW EM  
SBB 0  
LB 1.00 Hz  
GB 0  
PC 1.40

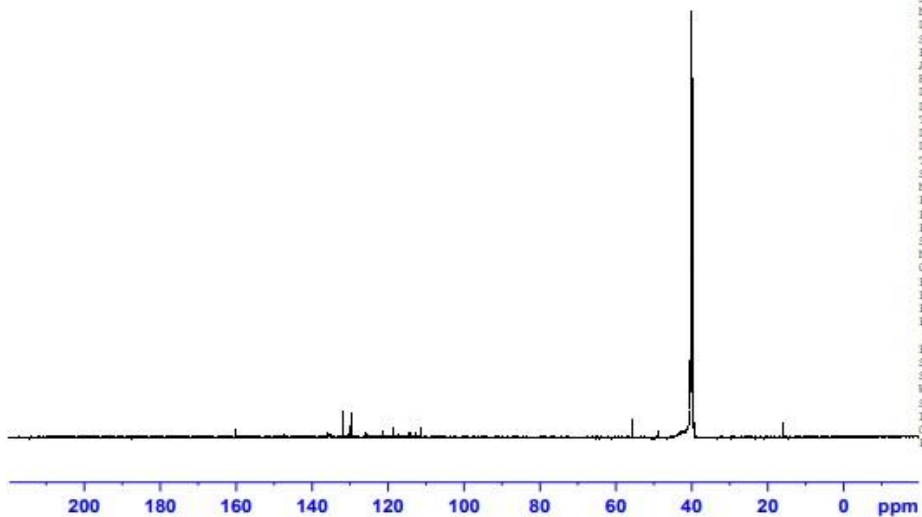

Figure S1-61. <sup>13</sup>C-NMR spectrum of compound 8a

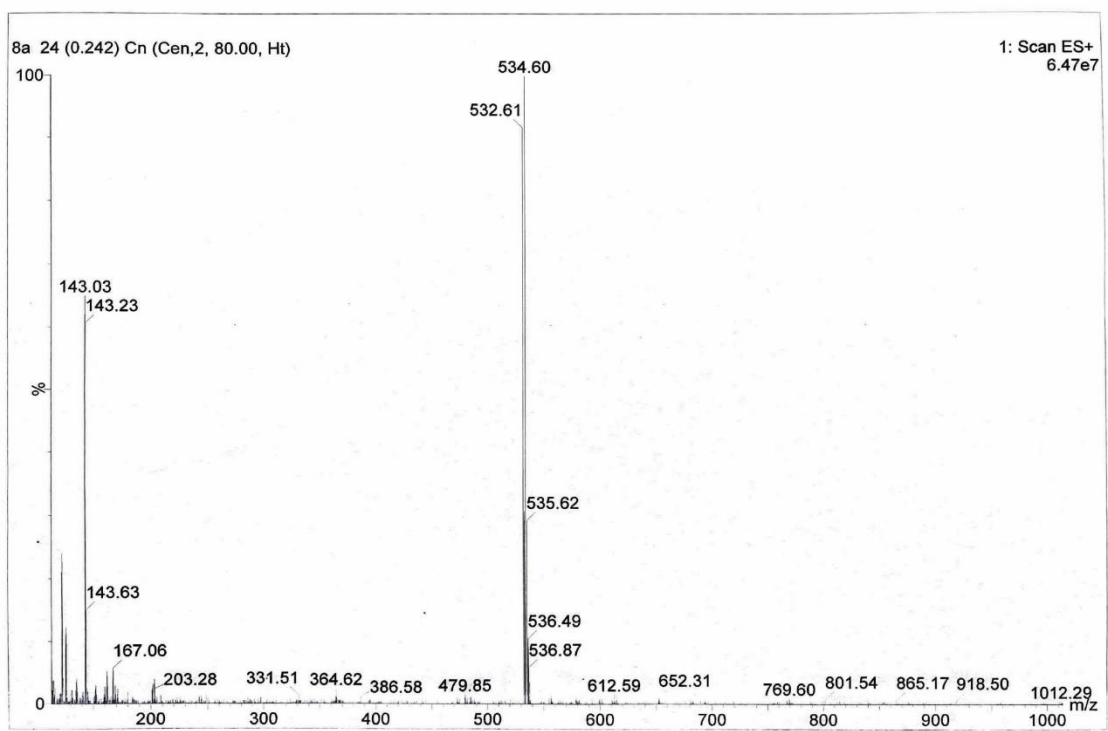

Figure S1-62. Mass spectrum of compound 8a

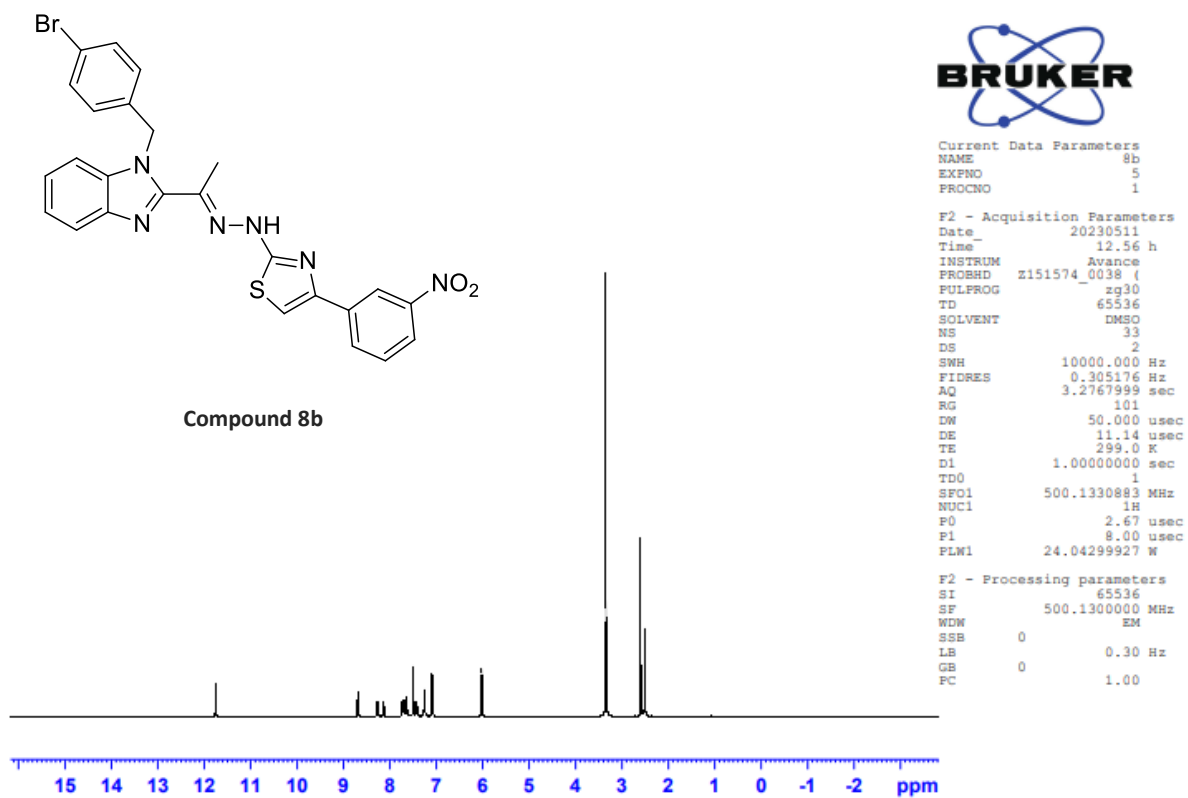

Figure S1-63. <sup>1</sup>H-NMR spectrum of compound 8b-1

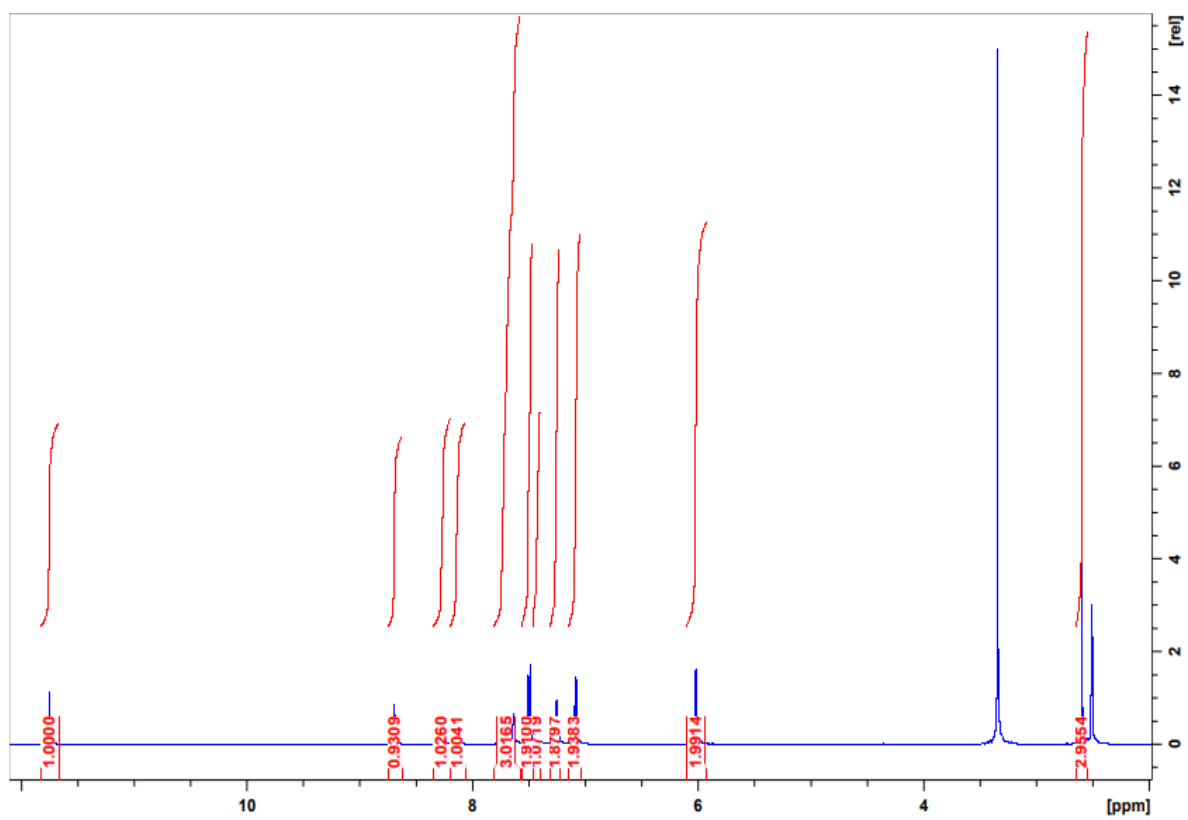

Figure S1-64. <sup>1</sup>H-NMR spectrum of compound 8b-2

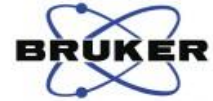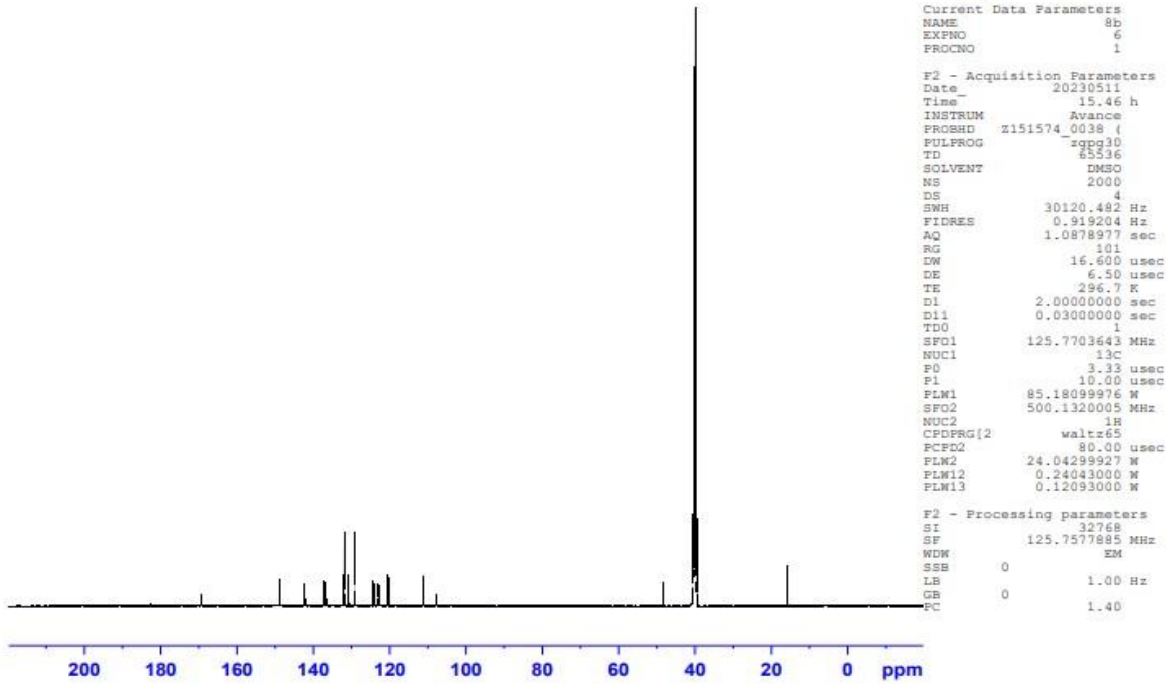

Figure S1-65. <sup>13</sup>C-NMR spectrum of compound 8b

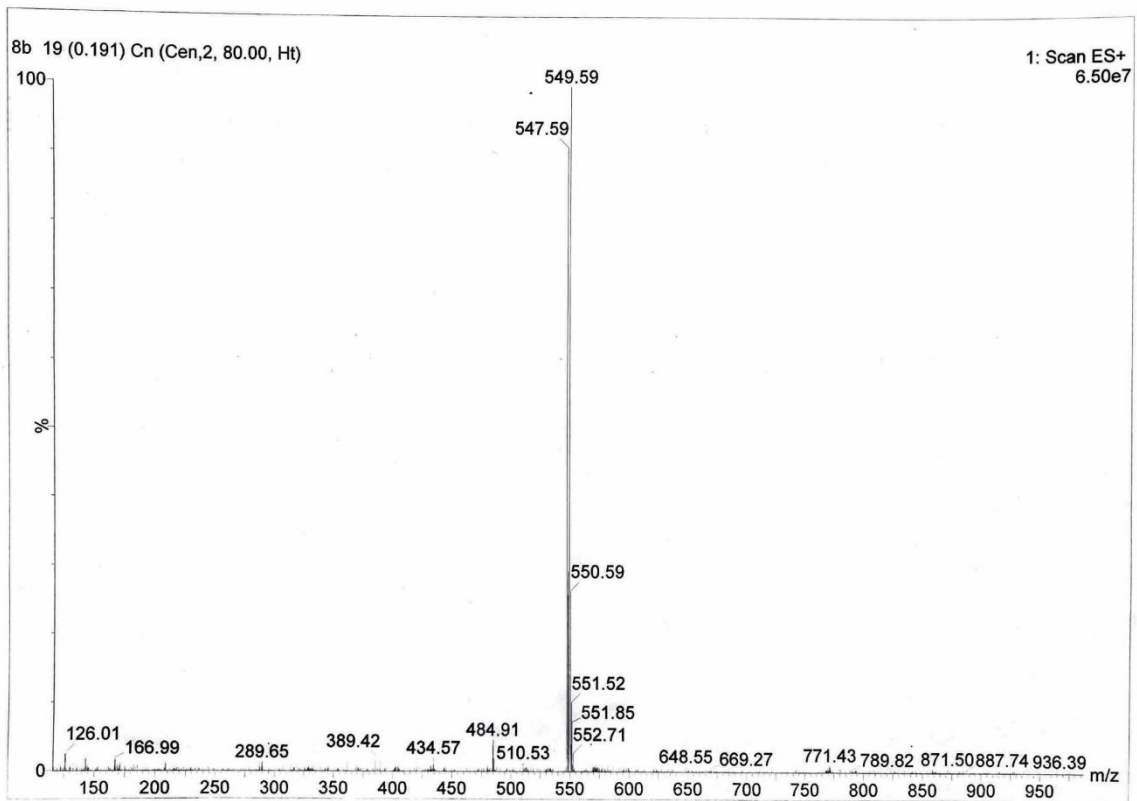

Figure S1-66. Mass spectrum of compound 8b

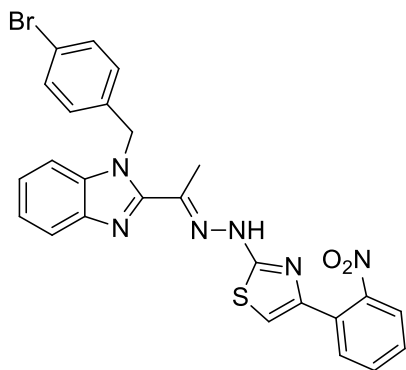

Compound 8c

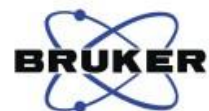

```

Current Data Parameters
NAME      8c
EXPNO    1
PROCNO   1

F2 - Acquisition Parameters
Date_    20230511
Time     15.53 h
INSTRUM  Avance
PROBHD   z151574_0038 (
PULPROG  zg30
TD       65536
SOLVENT  DMSO
NS       16
DS       2
SWH      10000.000 Hz
FIDRES   0.305176 Hz
AQ       3.2767999 sec
RG       101
MW       50.000 usec
DE       11.14 usec
TE       295.7 K
D1       1.00000000 sec
TD0      1
SFO1     500.1330883 MHz
NUC1     1H
P0       2.67 usec
P1       8.00 usec
PLW1     24.04299927 W

F2 - Processing parameters
SI       65536
SF       500.1300000 MHz
WDW      EM
SSB      0
LB       0.30 Hz
GB       0
PC       1.00
  
```

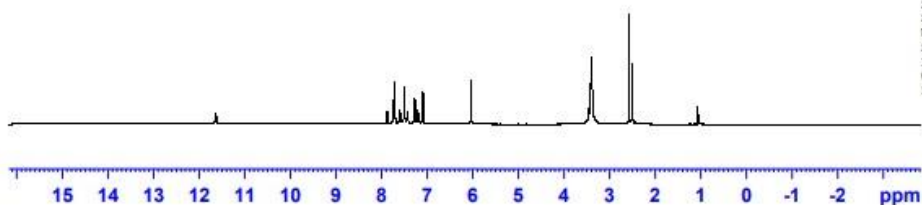

Figure S1-67. <sup>1</sup>H-NMR spectrum of compound 8c-1

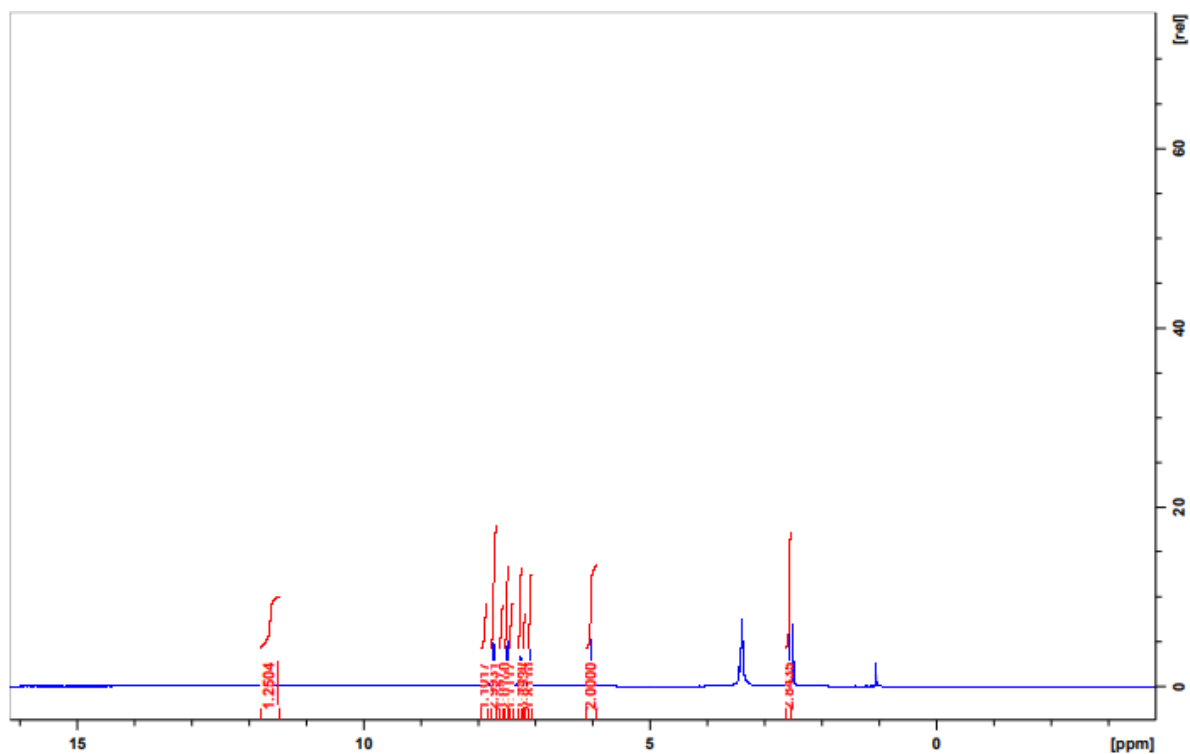

Figure S1-68. <sup>1</sup>H-NMR spectrum of compound 8c-2

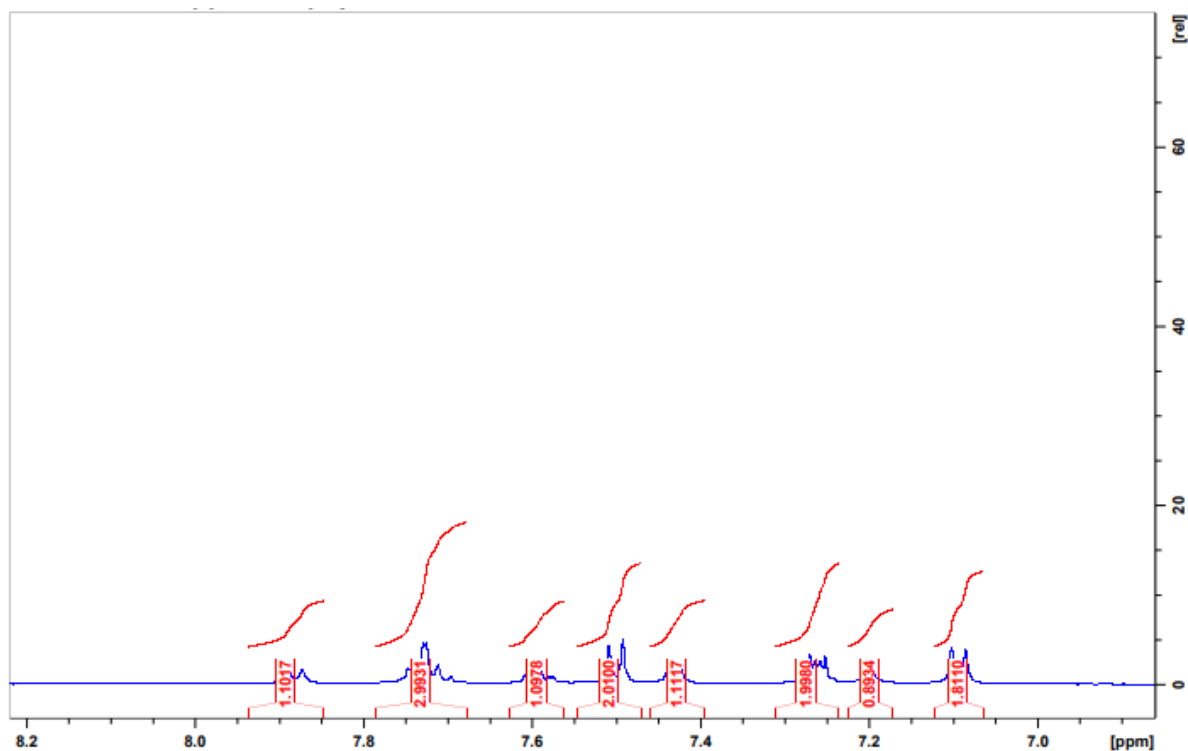

Figure S1-69.  $^1\text{H}$ -NMR spectrum of compound **8c-3**

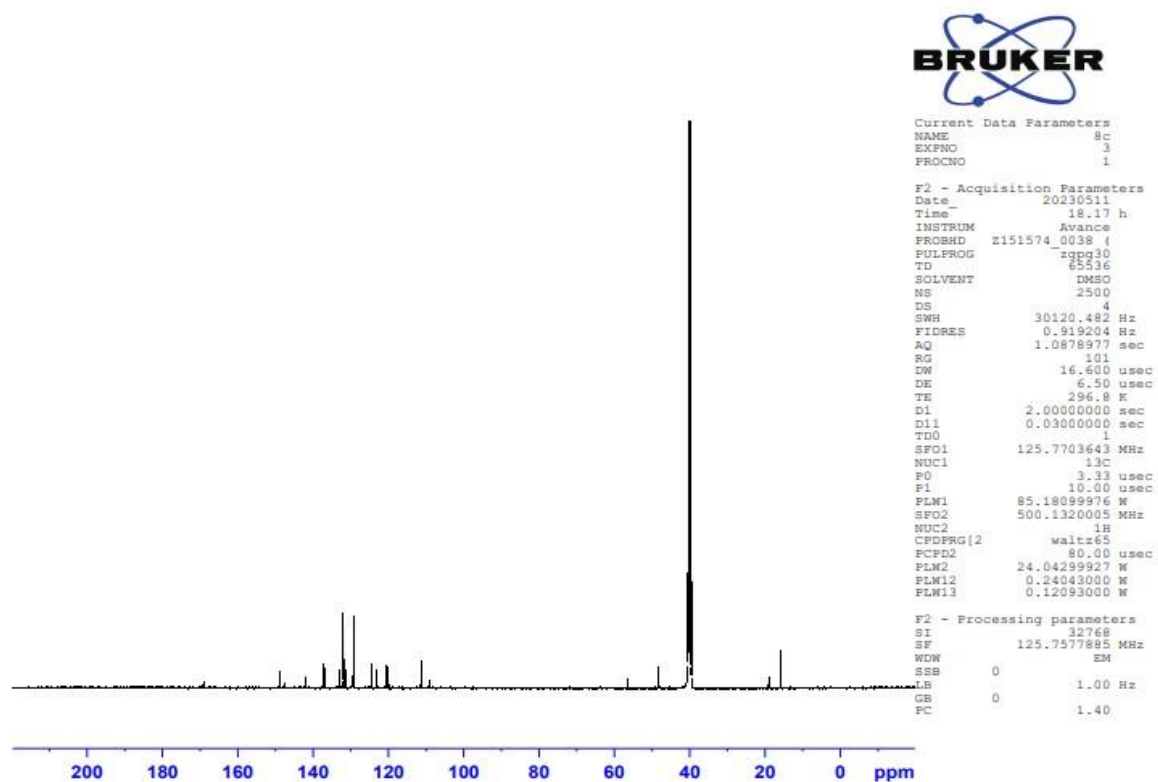

Figure S1-70.  $^{13}\text{C}$ -NMR spectrum of compound **8c**

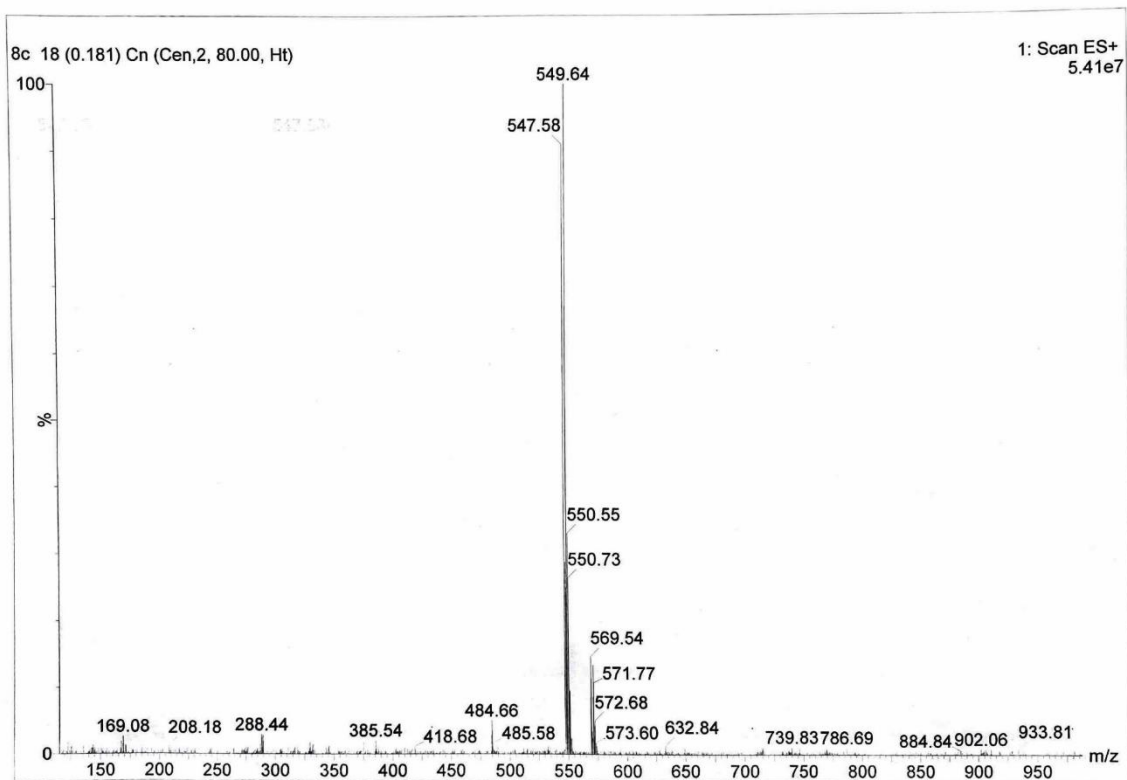

Figure S1-71. Mass spectrum of compound 8c

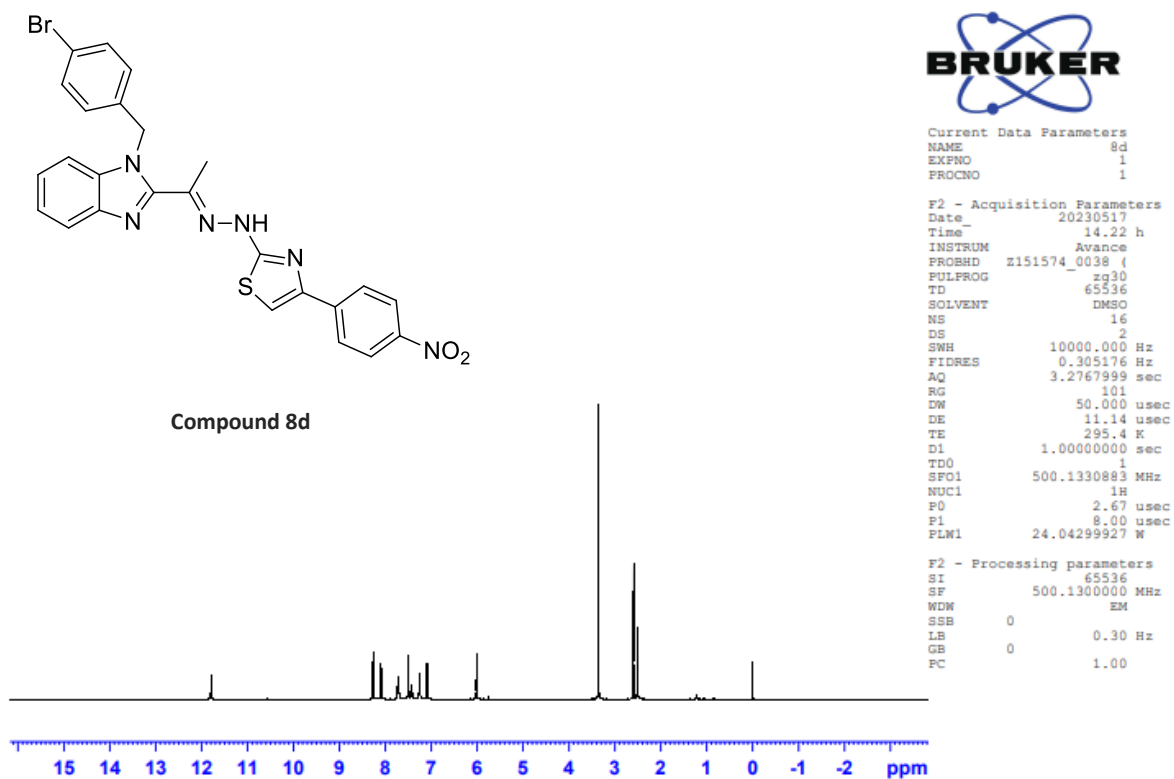

Figure S1-72.  $^1\text{H-NMR}$  spectrum of compound 8d-1



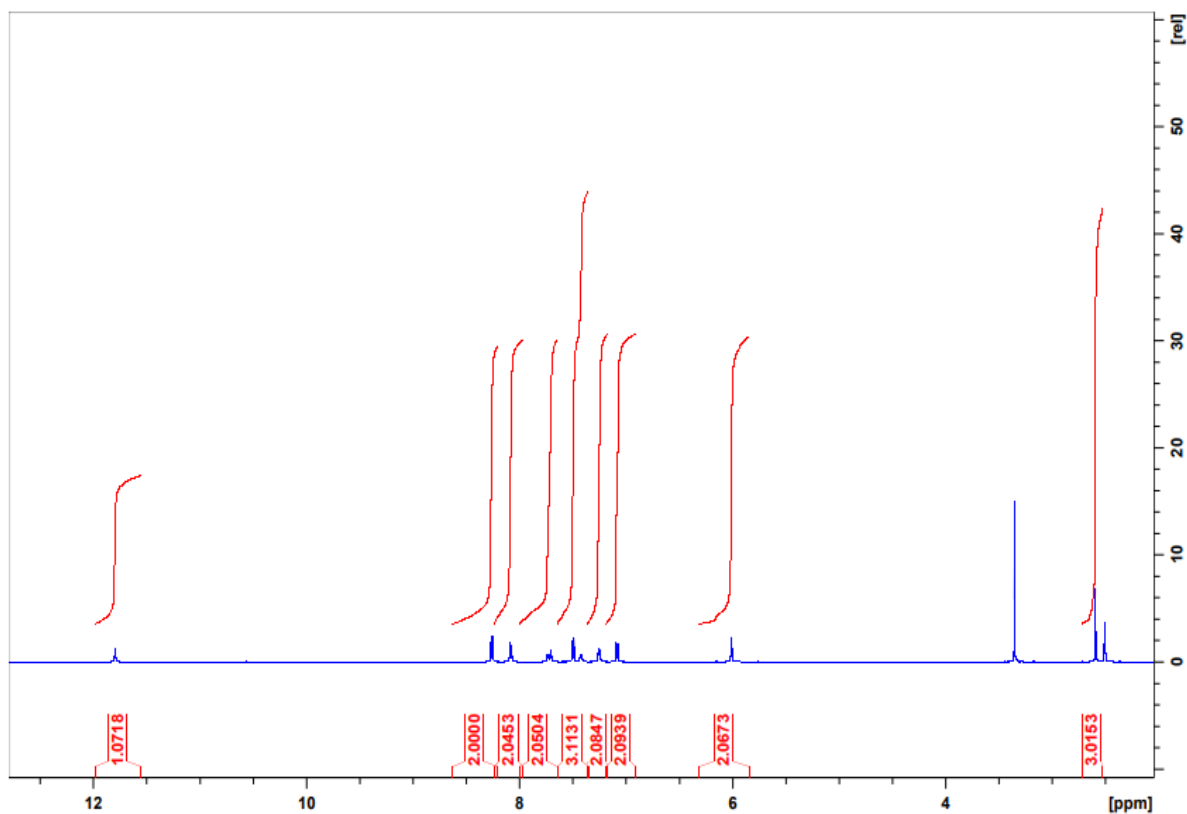

Figure S1-73. <sup>1</sup>H-NMR spectrum of compound 8d-2

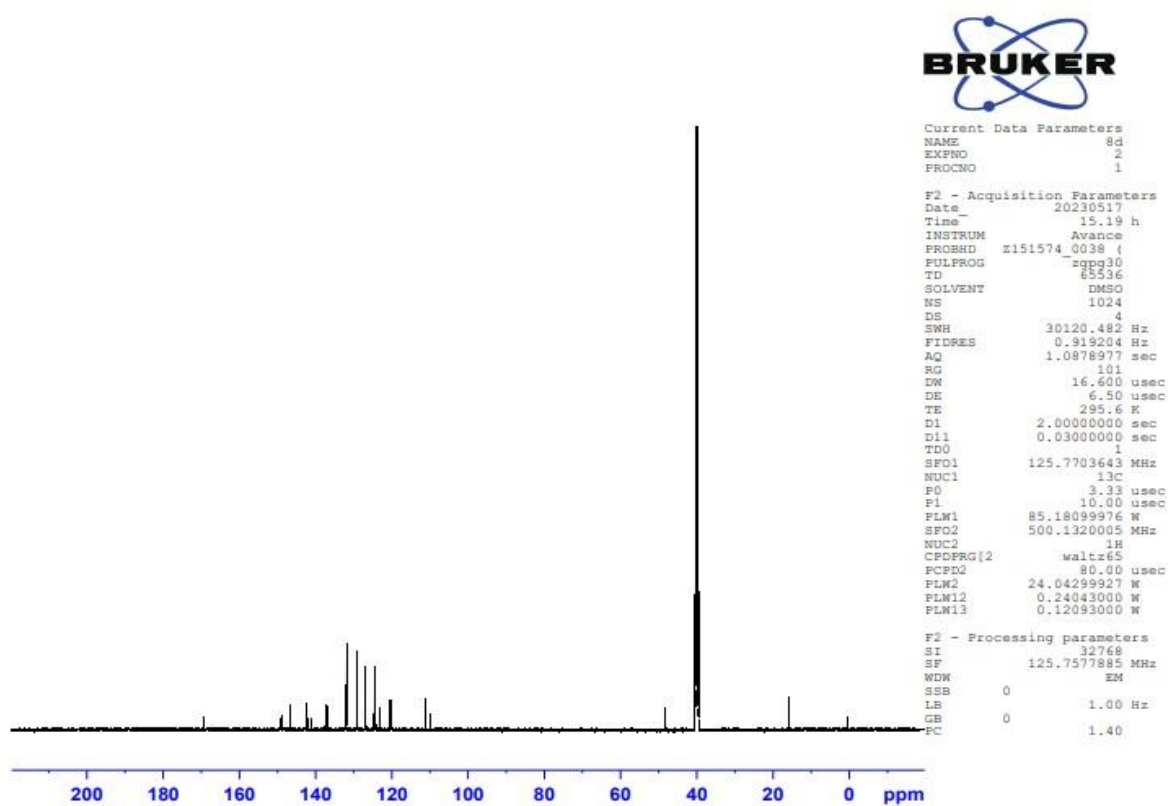

Figure S1-74. <sup>13</sup>C-NMR spectrum of compound 8d

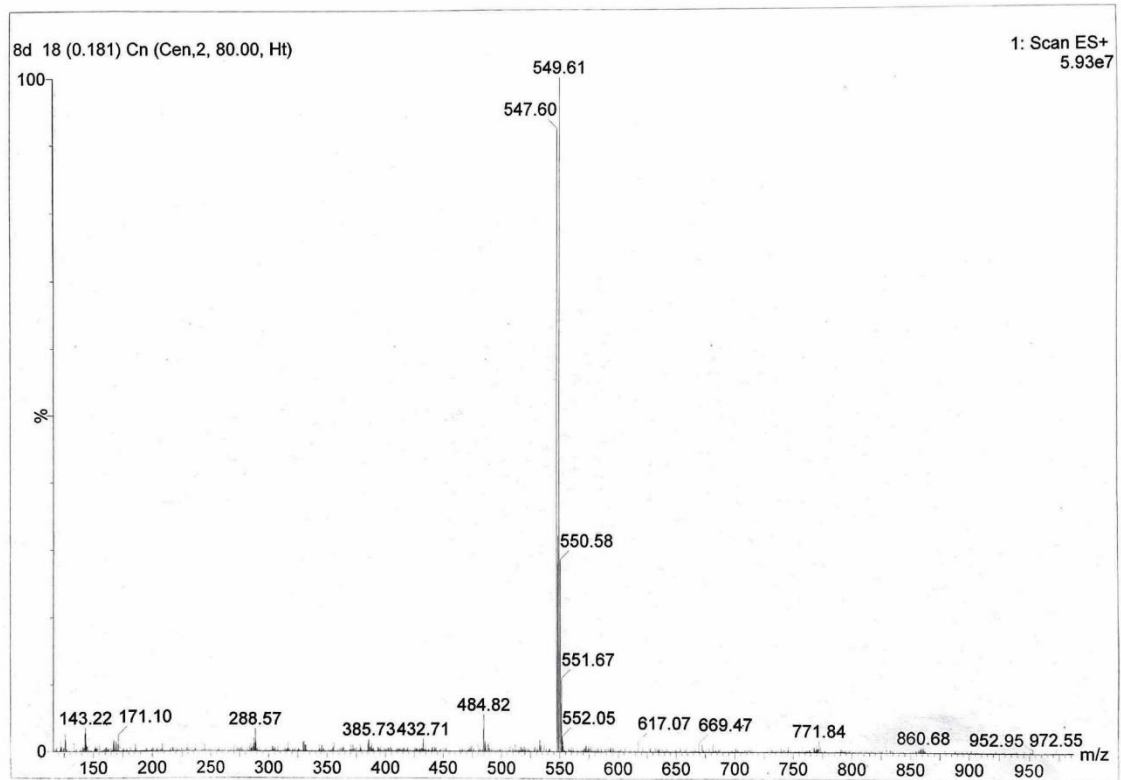

Figure S1-75. Mass spectrum of compound **8d**

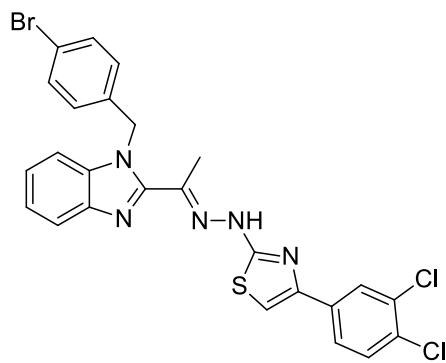

Compound **8e**

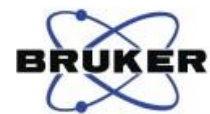

Current Data Parameters  
NAME 8e  
EXPNO 5  
PROCNO 1

F2 - Acquisition Parameters  
Date\_ 20230508  
Time 12.29 h  
INSTRUM Avance  
PROBHD z151574\_0038 (4  
PULPROG zg30  
TD 65536  
SOLVENT DMSO  
NS 16  
DS 2  
SWH 10000.000 Hz  
FIDRES 0.305176 Hz  
AQ 3.2767999 sec  
RG 101  
DW 50.000 usec  
DE 11.14 usec  
TE 295.5 K  
D1 1.00000000 sec  
TDO 1  
SFO1 500.1330883 MHz  
NUC1 1H  
P0 2.67 usec  
F1 0.00 usec  
PLM1 24.04299927 W

F2 - Processing parameters  
SI 65536  
SF 500.1330000 MHz  
WDW EM  
SSB 0  
LB 0.30 Hz  
GB 0  
FC 1.00

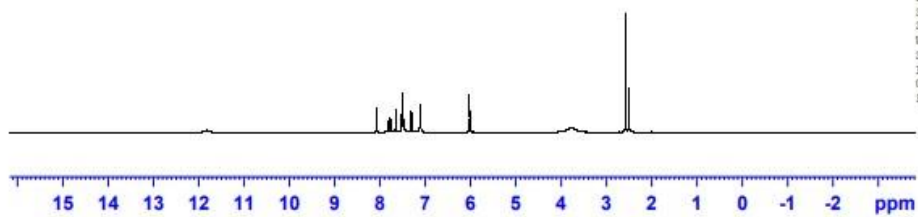

Figure S1-76. <sup>1</sup>H-NMR spectrum of compound **8e-1**

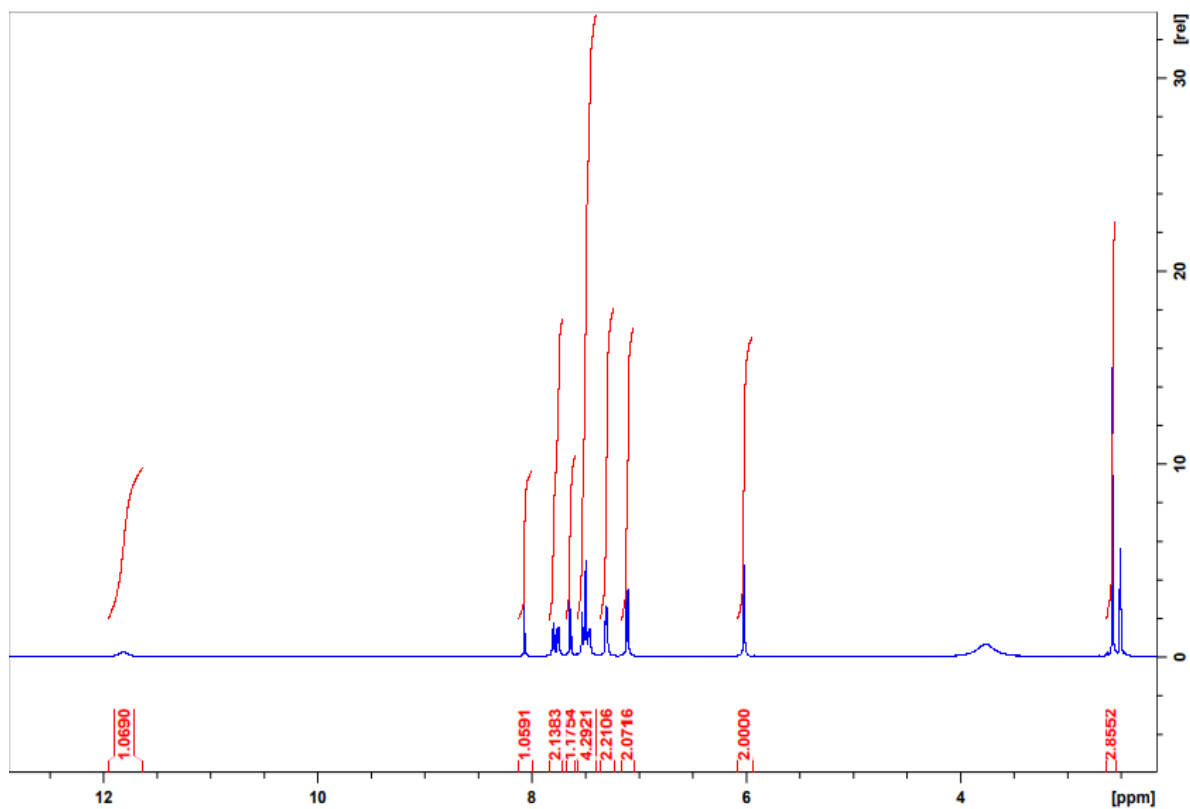

Figure S1-77.  $^1\text{H}$ -NMR spectrum of compound **8e-2**

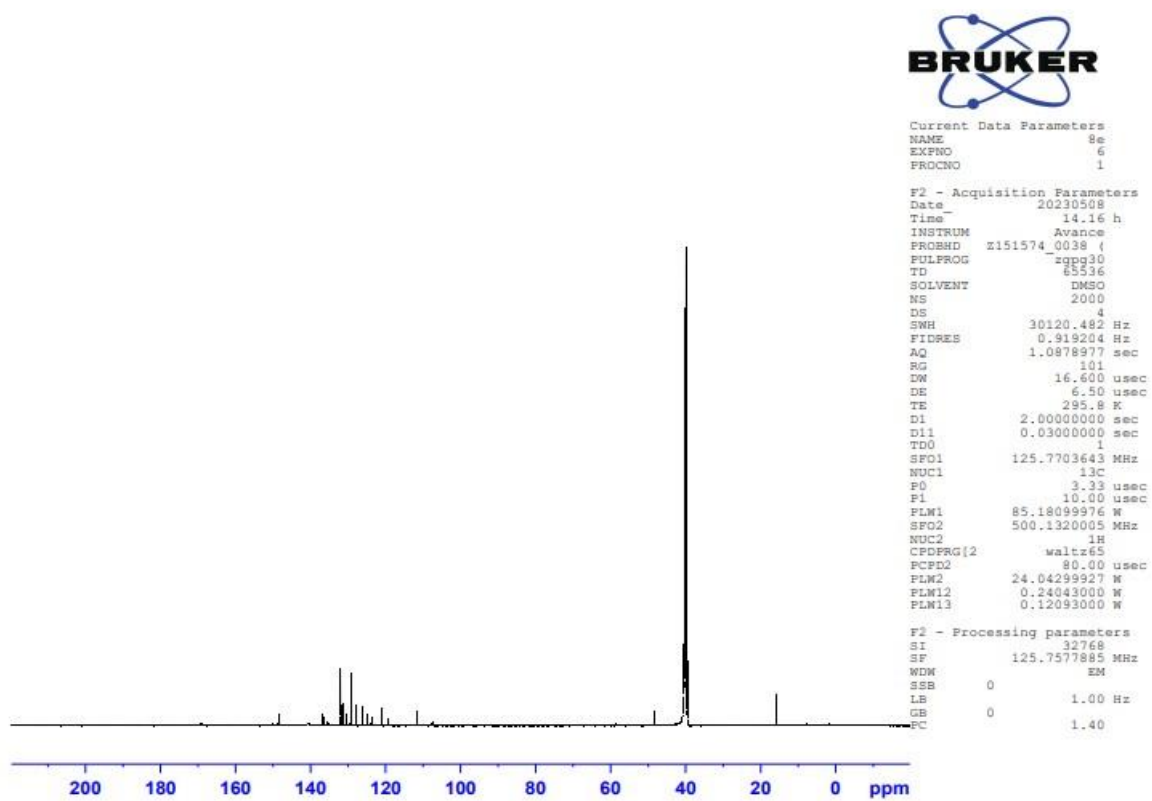

Figure S1-78.  $^{13}\text{C}$ -NMR spectrum of compound **8e**

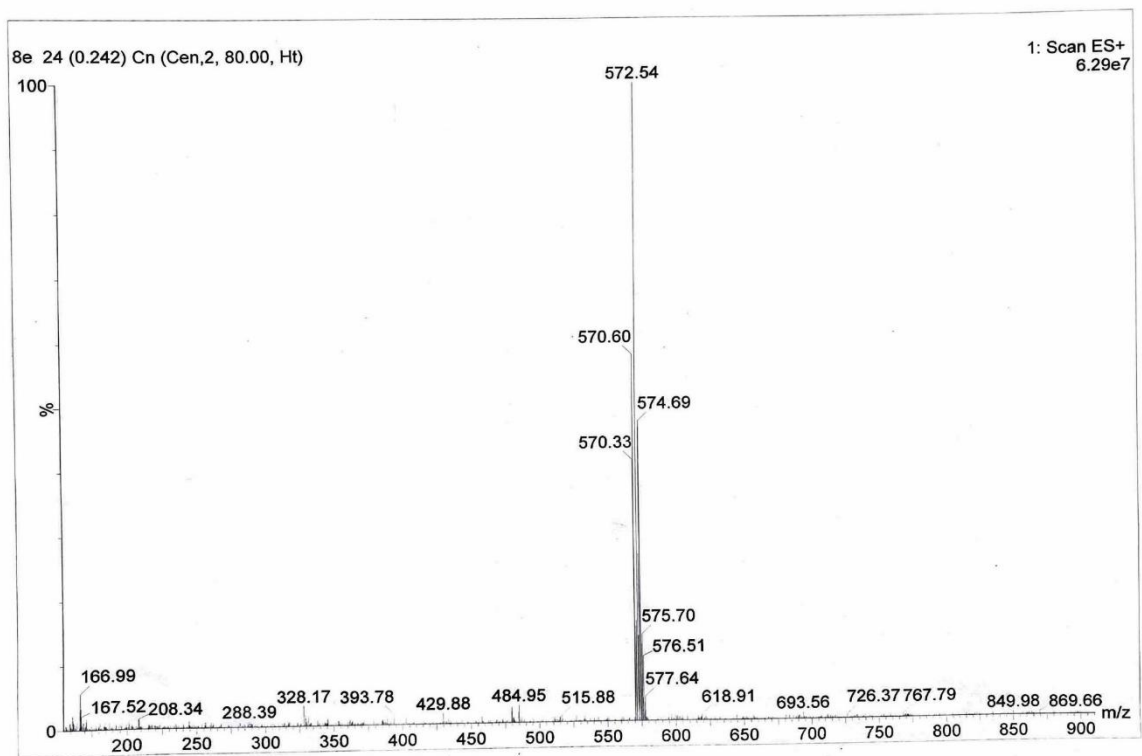

**Figure S1-79.** Mass spectrum of compound **8e**
